# Supplementary material for: Petasis adducts of tryptanthrin – synthesis, biological activity evaluation and druglikeness assessment
Source: Royal Society of Chemistry journal article supplement (doi:10.1039/d1nj02079j), 2021-01-01
Supplement: d1nj02079j1.pdf [file d1nj02079j1.pdf]

***New Journal of Chemistry***

**Petasis adducts of tryptanthrin – synthesis, biological activity evaluation  
and druglikeness assessment**

Pedro Brandão, Carolina Marques, Eugénia Pinto, Marta Pineiro, Anthony  
J. Burke

**Table of contents**

|                                                                          | <b>Pages</b> |
|--------------------------------------------------------------------------|--------------|
| <b>1. Synthesis of tryptanthrin derivatives (1a-d)</b>                   | <b>S1</b>    |
| <b>2. Synthesis of boronate-tryptanthrin derivatives (2a-d)</b>          | <b>S3</b>    |
| <b>3. Petasis 3-MCR</b>                                                  | <b>S5</b>    |
| <b>3.1. Library generation via Petasis 3-MCR</b>                         | <b>S5</b>    |
| <b>3.2. Asymmetric version</b>                                           | <b>S13</b>   |
| <b>4. References</b>                                                     | <b>S16</b>   |
| <b>5. NMR Spectra</b>                                                    | <b>S17</b>   |
| <b>6. Antimicrobial activity evaluation</b>                              | <b>S45</b>   |
| <b>7. SwissADME evaluation of the tryptanthrin-based Petasis adducts</b> | <b>S47</b>   |

## Experimental Section:

**General Remarks:** Reagents were obtained from Sigma–Aldrich, Acros, Strem and Alfa Aesar and were used as received. The solvents used were dried using current laboratory techniques.<sup>1</sup> Borylation reactions and Petasis reactions were conducted in a Radley's® 12-position carousel reactor under a nitrogen atmosphere or in round-bottom flasks. The 4Å molecular sieves (1-2 mm, 0.04-0.08 in) were obtained from Alfa Aesar (used as received). Column chromatography was carried out on silica flash (Carlo Erba, 40–63 µm, 60Å). Thin-layer chromatography (TLC) was carried out on aluminum-backed Kieselgel 60 F254 plates (Merck and Machery Nagel). Plates were visualized either by UV light or with phosphomolybdic acid in ethanol. Melting points (m.p.) were determined with a Barnstead Electrothermal 9100 apparatus and are uncorrected. NMR spectra were recorded with a Bruker Avance III instrument (400 MHz). The chemical shifts (δ) were quoted in parts per million (ppm) with respect to the solvent (CDCl<sub>3</sub>, <sup>1</sup>H: δ = 7.26 ppm, <sup>13</sup>C: δ = 77.2 ppm; [d<sub>6</sub>]DMSO, <sup>1</sup>H: δ = 2.50 ppm, <sup>13</sup>C: δ = 39.5 ppm). Coupling constants (J) are reported in Hz and refer to apparent peak multiplicities. Splitting patterns are reported as s, singlet; d, doublet; dd, doublet of doublets; t, triplet; q, quadruplet; m, multiplet; br, broad. Mass spectra (MS) were recorded with a quadrupole mass spectrometer Waters ZQ4000. The ionization was performed by ESI and the samples were infused in methanol. High-performance liquid chromatographic (HPLC) analysis was carried out with a Hitachi Primaide instrument, equipped with a 1410 series UV detector. Daicel Chiralpak IA column was used as stationary phase, n-hexane/ethanol as mobile phase and 254 nm was used as wavelength in the UV light detector.

B<sub>2</sub>NPG<sub>2</sub> = bis(neopentyl glycolato)diboron.

### 1. Synthesis of tryptanthrin derivatives (1a-d):

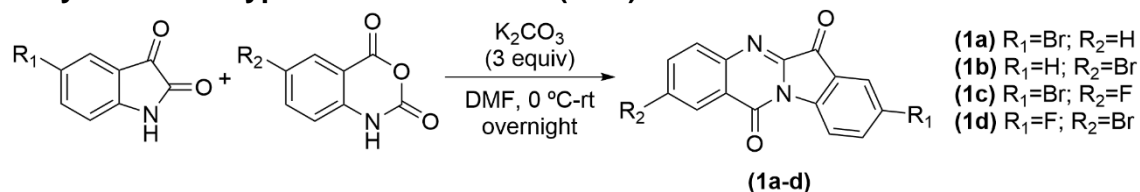

**Scheme S1.** Synthesis of tryptanthrin derivatives.

**General procedure:** In a round-bottomed flask placed in an ice bath, (un)substituted isatin (1 equiv.) was dissolved in DMF (20 mL). Potassium carbonate (3 equiv.) was slowly added, and allowed to stir, leading to a colour change and hydrogen release.

Once gas production ceased, the suspension was kept at room temperature and (un)substituted isatoic anhydride (1.2 equiv.) was added. The reaction was allowed to proceed overnight, with stirring at room temperature and monitored by TLC. When the reaction was complete, the formed solid was washed with water (3 x 50 mL) and ethanol (2 x 20 mL) and the corresponding tryptanthrin used in the next step without further purification.

*8-Bromo-tryptanthrin (8-bromoindolo[2,1-b]quinazoline-6,12-dione) (1a)*<sup>[2]</sup>: 5-bromo-isatin (1.0 g, 1 equiv.), isatoic anhydride (0.866 g, 1.2 equiv.), K<sub>2</sub>CO<sub>3</sub> (1.830 g, 3 equiv.) and DMF (20 mL) were used. The corresponding **1a** was obtained as a yellow solid (1.23 g, 85% yield).

*2-Bromo-tryptanthrin (2-bromoindolo[2,1-b]quinazoline-6,12-dione) (1b)*<sup>[2]</sup>: isatin (0.75 g, 1 equiv.), 5-bromoisatoic anhydride (1.48 g, 1.2 equiv.), K<sub>2</sub>CO<sub>3</sub> (2.11 g, 3 equiv.) and DMF (20 mL) were used. The corresponding **1b** was obtained as a yellow solid (1.59 g, 95% yield).

*8-Bromo-2-fluoro-tryptanthrin (8-bromo-2-fluoroindolo[2,1-b]quinazoline-6,12-dione) (1c)*: 5-bromoisatin (1.50 g, 1 equiv.), 5-fluoroisatoic anhydride (1.44 g, 1.2 equiv.), K<sub>2</sub>CO<sub>3</sub> (2.75 g, 3 equiv.) and DMF (20 mL) were used. The corresponding **1c** was obtained as a yellow solid (1.69 g, 74% yield).

*2-Bromo-8-fluoro-tryptanthrin (2-bromo-8-fluoroindolo[2,1-b]quinazoline-6,12-dione) (1d)*: 5-fluoroisatin (1.0 g, 1 equiv.), 5-bromoisatoic anhydride (1.76 g, 1.2 equiv.), K<sub>2</sub>CO<sub>3</sub> (2.75 g, 3 equiv.) and DMF (20 mL) were used. The corresponding **1d** was obtained as a yellow solid (1.70 g, 81% yield).

## 2. Synthesis of boronate-tryptanthrin derivatives (2a-d)

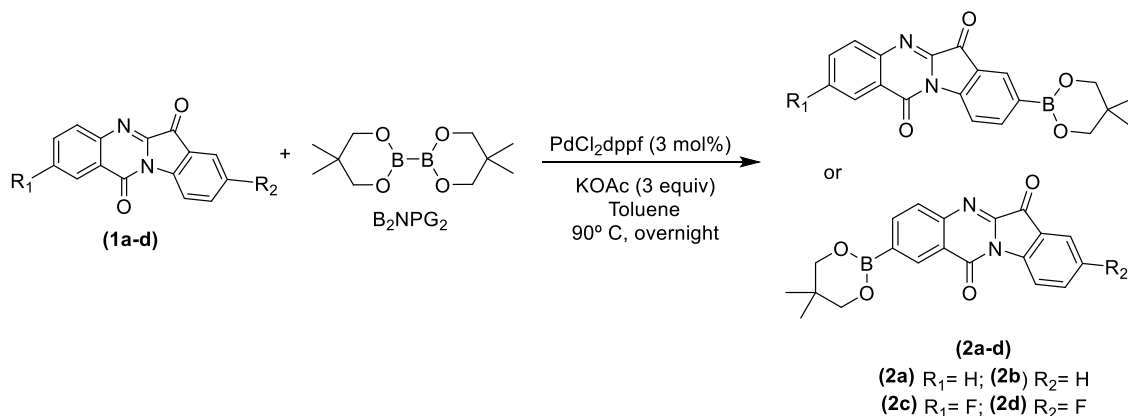

**Scheme S2.** Synthesis boronate-tryptanthrin derivatives (2a-d).

**General procedure**<sup>[3]</sup>: In a round-bottom flask or in a Radley's® 12 position carousel reactor tube under nitrogen atmosphere was added the halide derivatives (**1**),  $B_2NPG_2$  (1.1 equiv.),  $PdCl_2(dppf)$  (3 mol%), KOAc (3 equiv.) and toluene. The reaction was stirred at 90°C (in an oil bath when a round-bottom flask was used) overnight and monitored by TLC. The reaction was quenched with brine (30 mL) followed by extraction with  $CHCl_3$  (3 x 30 mL). The combined organic phases were dried with  $MgSO_4$ , filtered and the solvent evaporated on the rotative evaporator. The crude mixture was filtered over a porous plate glass filter funnel packed with a layer of celite and a layer of  $SiO_2$  and eluted with  $CHCl_3$  until the washings became colourless. After evaporation of the solvent the corresponding product (**2**) was obtained and used in the next steps.

*8-(5,5-dimethyl-1,3,2-dioxaborinan-2-yl)indolo[2,1-b]quinazoline-6,12-dione* (**2a**): 8-bromoindolo[2,1-b]quinazoline-6,12-dione (**1a**) (301.7 mg, 0.92 mmol),  $B_2NPG_2$  (228 mg, 1.0 mmol, 1.1 equiv.),  $PdCl_2(dppf)$  (20.1 mg, 0.028 mmol, 3 mol%), KOAc (270 mg, 2.8 mmol, 3 equiv.) and toluene (4 mL) were used. The corresponding **2a** was obtained as a yellow-green solid (275.2 mg, 87% yield). m.p.= >220°C.  $^1H$  NMR ( $CDCl_3$ , 400 MHz):  $\delta$  1.04 (s,  $CH_3$ , 6H), 3.79 (s,  $CH_2$ , 4H), 7.63-7.67 (t,  $J = 8$  Hz, Ar, 1H), 7.81-7.85 (t,  $J = 8$  Hz, Ar, 1H), 8.00-8.02 (d,  $J = 8$  Hz, Ar, 1H), 8.18-8.20 (d,  $J = 8$  Hz, Ar, 1H), 8.34 (s, Ar, 1H), 8.41-8.43 (d,  $J = 8$  Hz, Ar, 1H), 8.53-8.55 (d,  $J = 8$  Hz, Ar, 1H).  $^{13}C\{^1H\}$  APT NMR ( $CDCl_3$ , 100 MHz):  $\delta$  22.00, 32.08, 72.57, 117.02, 121.42, 123.84, 127.67, 130.24, 130.80, 131.27, 135.21, 144.21, 146.78, 147.90, 158.25, 182.80. HRMS (ESI-TOF) m/z: calcd. for  $C_{20}H_{18}BN_2O_4$   $[M]^+$  361.1760, found 361.0960.

*2-(5,5-dimethyl-1,3,2-dioxaborinan-2-yl)indolo[2,1-b]quinazoline-6,12-dione (2b)*: 2-bromoindolo[2,1-*b*]quinazoline-6,12-dione (**1b**) (373 mg, 0.9 mmol), B<sub>2</sub>NPG<sub>2</sub> (228 mg, 1.0 mmol, 1.1 equiv.), PdCl<sub>2</sub>(dppf) (20.1 mg, 0.028 mmol, 3 mol%), KOAc (270 mg, 2.8 mmol, 3 equiv.) and toluene (4 mL) were used. The corresponding **2b** was obtained as a yellow solid (369.6 mg, >99% yield). m.p.= >220°C. <sup>1</sup>H NMR (CDCl<sub>3</sub>, 400 MHz): δ 1.05 (s, CH<sub>3</sub>, 6H), 3.83 (s, CH<sub>2</sub>, 4H), 7.39-7.43 (t, *J*= 8 Hz, Ar, 1H), 7.76-7.80 (t, *J*= 8 Hz, Ar, 1H), 7.90-7.91 (d, *J*= 8 Hz, Ar, 1H), 7.96-7.98 (d, *J*= 8 Hz, Ar, 1H), 8.22-8.24 (d, *J*= 8 Hz, Ar, 1H), 8.64-8.66 (d, *J*= 8 Hz, Ar, 1H), 8.88 (s, Ar, 1H). <sup>13</sup>C{<sup>1</sup>H} NMR (CDCl<sub>3</sub>, 100 MHz): δ 22.03, 32.11, 72.62, 118.18, 122.05, 122.91, 125.48, 127.20, 129.76, 133.75, 138.39, 140.28, 144.80, 146.60, 148.24, 158.44, 182.87. HRMS (ESI-TOF) *m/z*: calcd. for C<sub>20</sub>H<sub>18</sub>BN<sub>2</sub>O<sub>4</sub> [M]<sup>+</sup> 361.1760, found 361.0957.

*8-(5,5-dimethyl-1,3,2-dioxaborinan-2-yl)-2-fluoroindolo[2,1-b]quinazoline-6,12-dione (2c)*: 8-bromo-2-fluoroindolo[2,1-*b*]quinazoline-6,12-dione (**1c**) (332 mg, 0.8 mmol), B<sub>2</sub>NPG<sub>2</sub> (216 mg, 0.9 mmol, 1.1 equiv.), PdCl<sub>2</sub>(dppf) (19.1 mg, 0.026 mmol, 3 mol%), KOAc (256 mg, 2.6 mmol, 3 equiv.) and toluene (4 mL) were used. The corresponding **2c** was obtained as a yellow solid (292.8 mg, 80% yield). m.p.= >220°C. <sup>1</sup>H NMR (CDCl<sub>3</sub>, 400 MHz): δ 1.04 (s, CH<sub>3</sub>, 6H), 3.80 (s, CH<sub>2</sub>, 4H), 7.55-7.58 (m, Ar, 1H), 8.02-8.09 (m, Ar, 2H), 8.20-8.22 (d, *J*= 8 Hz, Ar, 1H), 8.36 (s, Ar, 1H), 8.54-8.56 (d, *J*= 8 Hz, Ar, 1H). <sup>13</sup>C{<sup>1</sup>H} NMR (CDCl<sub>3</sub>, 100 MHz): δ 22.01, 32.11, 72.60, 113.27, 113.55, 117.08, 118.17, 121.50, 123.37, 123.61, 125.65, 127.61, 131.37, 133.26, 138.48, 143.43, 144.27, 147.66, 157.34, 182.31. HRMS (ESI-TOF) *m/z*: calcd. for C<sub>20</sub>H<sub>17</sub>BFN<sub>2</sub>O<sub>4</sub> [M]<sup>+</sup> 379.1740, found 379.0864.

*2-(5,5-dimethyl-1,3,2-dioxaborinan-2-yl)-8-fluoroindolo[2,1-b]quinazoline-6,12-dione (2d)*: 2-bromo-8-fluoroindolo[2,1-*b*]quinazoline-6,12-dione (**1d**) (297 mg, 0.8 mmol), B<sub>2</sub>NPG<sub>2</sub> (216 mg, 0.9 mmol, 1.1 equiv.), PdCl<sub>2</sub>(dppf) (19.1 mg, 0.026 mmol, 3 mol%), KOAc (256 mg, 2.6 mmol, 3 equiv.) and toluene (4 mL) were used. The corresponding **2d** was obtained as a yellow solid (302 mg, 93% yield). m.p.= >220°C. <sup>1</sup>H NMR (CDCl<sub>3</sub>, 400 MHz): δ 1.05 (s, CH<sub>3</sub>, 6H), 3.83 (s, CH<sub>2</sub>, 4H), 7.46-7.50 (t, *J*= 8 Hz, Ar, 1H), 7.56-7.58 (d, *J*= 8 Hz, Ar, 1H), 7.96-7.98 (d, *J*= 8 Hz, Ar, 1H), 8.23-8.25 (d, *J*= 8 Hz, Ar, 1H), 8.65-8.66 (m, Ar, 1H), 8.87 (s, Ar, 1H). <sup>13</sup>C{<sup>1</sup>H} NMR (CDCl<sub>3</sub>, 100 MHz): δ 22.03, 32.11, 72.62, 118.18, 122.05, 122.91, 124.31, 125.48, 127.20, 129.76, 132.72, 133.75, 138.39, 140.28, 144.80, 146.60, 148.24, 158.44, 182.87. MS (ESI) *m/z*: 333.09 (M-OHNa)<sup>+</sup>.

### 3. Petasis 3-MCR

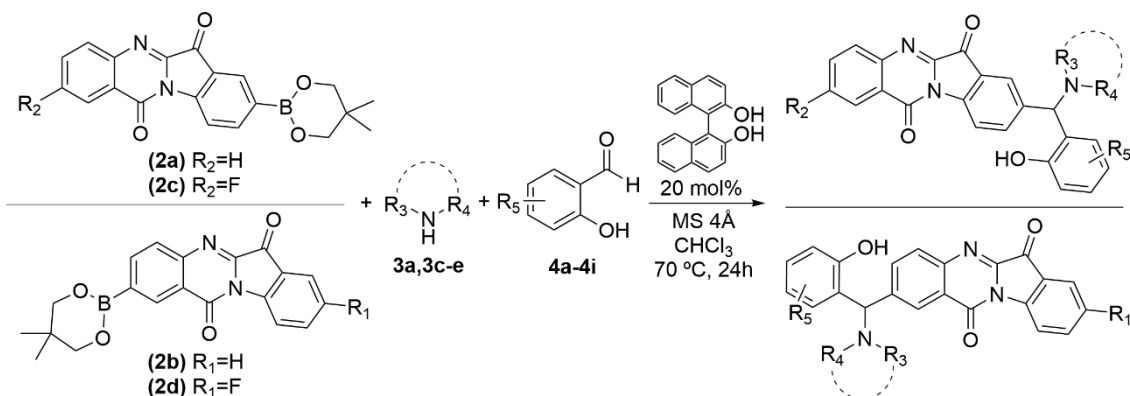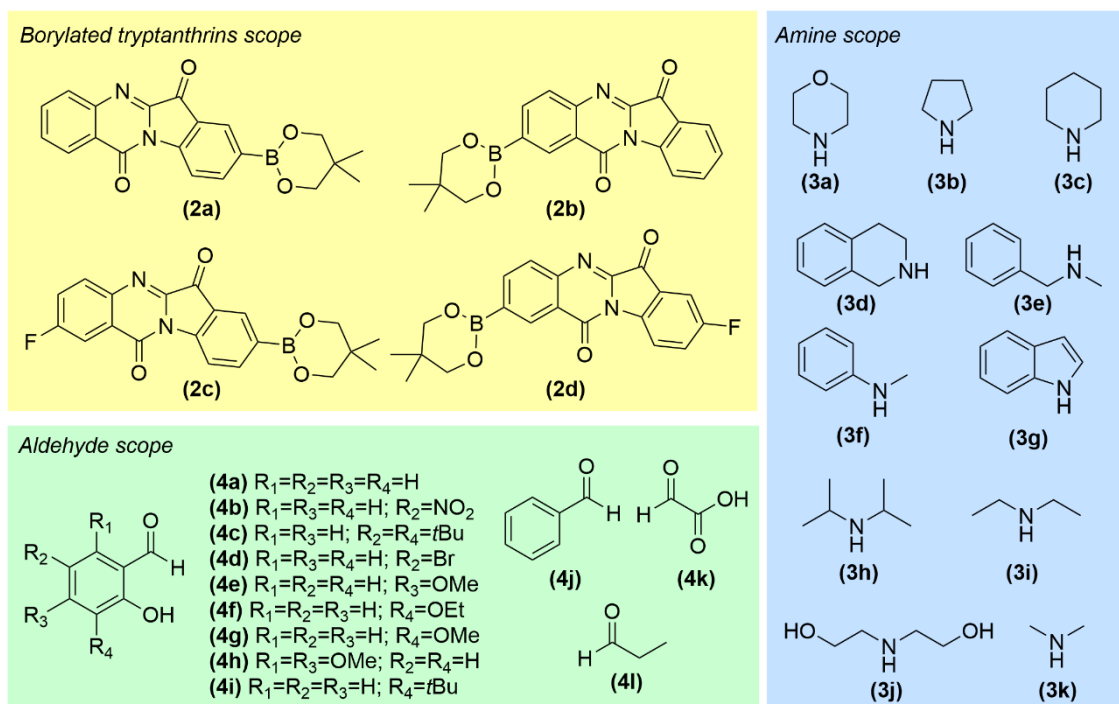

**Scheme S3.** Synthesis of new tryptanthrin derivatives *via* Petasis MCR and reaction scope.

#### 3.1. Library generation *via* Petasis 3-MCR

**General Procedure:** In a round-bottom flask or in a Radley's® 12 position carousel reactor tube was added the borylated tryptanthrin derivatives (2) (0.3 mmol, 1.0 equiv.), the amine (3.9 equiv.), the aldehyde (3.3 equiv.), BINOL (20 mol%), MS 4Å (200 mg) and CHCl<sub>3</sub> (3 mL). The reaction was stirred at 70 °C for 24 hours. After cooling down, the reaction mixture was filtered with a porous plate glass funnel packed with a celite layer and washed with CHCl<sub>3</sub>. The solvent was evaporated under reduced pressure and

the crude product purified by silica gel flash chromatography using hexane/AcOEt from (5:1) to (1:1) as eluents.

*8-((2-hydroxyphenyl)(morpholino)methyl)indolo[2,1-b]quinazoline-6,12-dione (5aaa):* **2a** (112 mg, 0.3 mmol, 1 equiv.), **3a** (0.1 mL, 1.1 mmol, 3.9 equiv.), **4a** (0.1 mL, 0.9 mmol, 3.3 equiv.), BINOL (15.9 mg, 0.06 mmol, 20 mol%), MS 4Å (200 mg) and CHCl<sub>3</sub> (3 mL) were used to obtain the corresponding **5aaa** as a yellow solid (89.9 mg, 66% yield). m.p.= >220°C. <sup>1</sup>H NMR (CDCl<sub>3</sub>, 400 MHz): δ 2.48-2.51 (m, CH<sub>2</sub>, 2H), 2.65 (s br, CH<sub>2</sub>, 2H), 3.79 (s, CH<sub>2</sub>, 4H), 4.50 (s, CH, 1H), 6.74-6.78 (t, *J*= 8 Hz, Ar, 1H), 6.88-6.90 (d, *J*= 8 Hz, Ar, 1H), 6.95-6.97 (d, *J*= 8 Hz, Ar, 1H), 7.14-7.18 (t, *J*= 8 Hz, Ar, 1H), 7.63-7.66 (t, Ar, 1H), 7.81-7.85 (t, *J*= 8 Hz, Ar, 1H), 7.87-7.89 (m, Ar, 1H), 7.96-8.00 (m, Ar, 2H), 8.38-8.40 (d, *J*= 8 Hz, Ar, 1H), 8.54-8.56 (d, *J*= 8 Hz, Ar, 1H), 11.29 (s br, OH, 1H). <sup>13</sup>C{<sup>1</sup>H} APT NMR (CDCl<sub>3</sub>, 100 MHz): δ 52.47, 66.86, 76.15, 117.12, 118.66, 120.21, 122.53, 123.70, 125.30, 127.71, 129.22, 129.52, 130.52, 130.92, 135.35, 138.36, 139.26, 144.39, 145.98, 146.63, 155.91, 157.99, 182.23. HRMS (ESI-TOF) *m/z*: calcd. for C<sub>26</sub>H<sub>22</sub>O<sub>4</sub>N<sub>3</sub> [M]<sup>+</sup> 440.16048, found 440.1597.

*8-((2-hydroxyphenyl)(piperidin-1-yl)methyl)indolo[2,1-b]quinazoline-6,12-dione (5aca):* **2a** (100 mg, 0.3 mmol, 1 equiv.), **3c** (0.1 mL, 1.1 mmol, 3.9 equiv.), **4a** (0.1 mL, 0.9 mmol, 3.3 equiv.), BINOL (15.9 mg, 0.06 mmol, 20 mol%), MS 4Å (200 mg) and CHCl<sub>3</sub> (3 mL) were used to obtain the corresponding **5aca** as a green solid (32.1 mg, 26% yield). m.p.= 216.8°C decomp. <sup>1</sup>H NMR (CDCl<sub>3</sub>, 400 MHz): δ 1.49-1.67 (m, CH<sub>2</sub>, 6H), 2.37-2.44 (m, CH<sub>2</sub>, 4H), 4.55 (s, CH, 1H), 6.70-6.73 (t, Ar, 1H), 6.86-6.89 (m, Ar, 2H), 7.11-7.15 (t, *J*= 8 Hz, Ar, 1H), 7.61-7.64 (t, Ar, 1H), 7.79-7.84 (m, Ar, 2H), 7.92 (s, Ar, 1H), 7.97-7.99 (d, *J*= 8 Hz, Ar, 1H), 8.36-8.38 (d, *J*= 8 Hz, Ar, 1H), 8.51-8.53 (d, *J*= 8 Hz, Ar, 1H), 12.06 (s br, OH, 1H). <sup>13</sup>C{<sup>1</sup>H} NMR (CDCl<sub>3</sub>, 100 MHz): δ 24.08, 26.08, 52.84, 75.85, 117.51, 118.44, 119.62, 122.33, 123.71, 124.44, 125.47, 127.66, 128.96, 129.10, 130.42, 130.86, 135.27, 138.57, 139.57, 144.48, 145.81, 146.65, 156.86, 157.96, 182.43. HRMS (ESI-TOF) *m/z*: calcd. for C<sub>27</sub>H<sub>24</sub>O<sub>3</sub>N<sub>3</sub> [M]<sup>+</sup> 438.18122, found 438.1803.

*8-((3,4-dihydroisoquinolin-2(1H)-yl)(2-hydroxyphenyl)methyl)indolo[2,1-b]quinazoline-6,12-dione (5ada):* **2a** (122 mg, 0.3 mmol), **3d** (0.14 mL, 1.1 mmol, 3.9 equiv.), **4a** (0.1 mL, 0.9 mmol, 3.3 equiv.), BINOL (15.9 mg, 0.06 mmol, 20 mol%), MS 4Å (200 mg) and CHCl<sub>3</sub> (3 mL) were used to obtain the corresponding **5ada** as a yellow solid (19.1 mg, 12% yield). m.p.= 215°C decomp. <sup>1</sup>H NMR (CDCl<sub>3</sub>, 400 MHz): δ 2.82-3.10 (m, CH<sub>2</sub>, 4H), 3.71 (s, CH<sub>2</sub>, 2H), 4.71 (s, CH, 1H), 6.76-6.80 (t, *J*= 8 Hz, Ar, 1H), 6.90-6.92 (m, Ar, 2H), 6.99-7.00 (m, Ar, 1H), 7.09-7.21 (m, Ar, 4H), 7.63-7.67 (t, *J*= 8 Hz, Ar, 2H), 7.81-7.85 (t,

$J = 8$  Hz, Ar, 1H), 7.96-8.02 (m, Ar, 3H), 8.39-8.41 (d,  $J = 8$  Hz, Ar, 1H), 8.56-8.58 (d,  $J = 8$  Hz, Ar, 1H), 11.49 (s br, OH, 1H).  $^{13}\text{C}\{^1\text{H}\}$  NMR ( $\text{CDCl}_3$ , 100 MHz):  $\delta$  28.59, 49.23, 54.62, 75.16, 117.81, 118.70, 119.98, 122.51, 123.74, 124.34, 125.22, 126.27, 126.92, 127.02, 127.71, 128.78, 129.05, 129.38, 130.48, 130.92, 132.94, 133.44, 135.32, 138.24, 139.93, 144.47, 145.99, 146.67, 156.47, 158.01, 182.38. HRMS (ESI-TOF)  $m/z$ : calcd. for  $\text{C}_{31}\text{H}_{24}\text{O}_3\text{N}_3$   $[\text{M}]^+$  486.18122, found 486.1805.

*8-((3,5-di-tert-butyl-2-hydroxyphenyl)(morpholino)methyl)indolo[2,1-b]quinazoline-6,12-dione (5aac)*: **2a** (88 mg, 0.3 mmol), **3a** (0.1 mL, 1.1 mmol, 3.9 equiv.), **4c** (215 mg, 0.9 mmol, 3.3 equiv.), BINOL (15.9 mg, 0.06 mmol, 20 mol%), MS  $4\text{\AA}$  (200 mg) and  $\text{CHCl}_3$  (3 mL) were used to obtain the corresponding **5aac** as a yellow solid (60.5 mg, 45% yield). m.p. = 217.2°C decomp.  $^1\text{H}$  NMR ( $\text{CDCl}_3$ , 400 MHz):  $\delta$  1.21 (s,  $\text{CH}_3$ , 9H), 1.44 (s,  $\text{CH}_3$ , 9H), 2.50-2.60 (m,  $\text{CH}_2$ , 4H), 3.79 (s,  $\text{CH}_2$ , 4H), 4.46 (s, CH, 1H), 6.80 (s, Ar, 1H), 7.20 (s, Ar, 1H), 7.63-7.67 (t,  $J = 8$  Hz, Ar, 1H), 7.81-7.85 (t,  $J = 8$  Hz, Ar, 1H), 7.95-8.02 (m, Ar, 3H), 8.40-8.42 (d,  $J = 8$  Hz, Ar, 1H), 8.54-8.56 (d,  $J = 8$  Hz, Ar, 1H), 11.45 (s br, OH, 1H).  $^{13}\text{C}\{^1\text{H}\}$  NMR ( $\text{CDCl}_3$ , 100 MHz):  $\delta$  29.68, 31.72, 34.33, 35.23, 66.82, 77.05, 118.69, 122.45, 122.83, 123.76, 125.46, 127.74, 130.46, 130.93, 135.31, 137.08, 138.44, 139.79, 141.72, 144.51, 145.92, 146.71, 152.35, 158.03, 182.44. HRMS (ESI-TOF)  $m/z$ : calcd. for  $\text{C}_{34}\text{H}_{38}\text{O}_4\text{N}_3$   $[\text{M}]^+$  552.2857, found 552.2850.

*8-((5-bromo-2-hydroxyphenyl)(morpholino)methyl)indolo[2,1-b]quinazoline-6,12-dione (5aad)*: **2a** (177 mg, 0.5 mmol), **3a** (0.17 mL, 1.9 mmol, 3.9 equiv.), **4d** (332 mg, 1.7 mmol, 3.3 equiv.), BINOL (28.6 mg, 0.1 mmol, 20 mol%), MS  $4\text{\AA}$  (300 mg) and  $\text{CHCl}_3$  (5 mL) were used to obtain the corresponding **5aad** as a green solid (147.4 mg, 58% yield). m.p. = 170°C decomp.  $^1\text{H}$  NMR ( $\text{CDCl}_3$ , 400 MHz):  $\delta$  2.29-2.62 (m,  $\text{CH}_2$ , 4H), 3.77 (s br,  $\text{CH}_2$ , 4H), 4.45 (s, CH, 1H), 6.77-6.79 (d,  $J = 8$  Hz, Ar, 1H), 7.07 (s, Ar, 1H), 7.23-7.26 (m, Ar, 1H), 7.62-7.66 (t,  $J = 8$  Hz, Ar, 1H), 7.82-7.84 (m, Ar, 2H), 7.93 (s, Ar, 1H), 7.97-7.99 (d,  $J = 8$  Hz, Ar, 1H), 8.36-8.38 (d,  $J = 8$  Hz, Ar, 1H), 8.55-8.57 (d,  $J = 8$  Hz, Ar, 1H), 11.47 (s br, OH, 1H).  $^{13}\text{C}\{^1\text{H}\}$  NMR ( $\text{CDCl}_3$ , 100 MHz):  $\delta$  66.77, 75.64, 111.78, 118.79, 119.66, 122.64, 123.68, 125.24, 125.73, 127.74, 130.58, 130.95, 131.73, 132.32, 135.41, 138.28, 138.45, 144.31, 146.16, 146.61, 155.18, 158.00, 182.23. HRMS (ESI-TOF)  $m/z$ : calcd. for  $\text{C}_{26}\text{H}_{21}\text{O}_4\text{N}_3\text{Br}$   $[\text{M}]^+$  518.0710, found 518.0701.

*8-((3-ethoxy-2-hydroxyphenyl)(morpholino)methyl)indolo[2,1-b]quinazoline-6,12-dione (5aaf)*: **2a** (93 mg, 0.3 mmol), **3a** (0.1 mL, 1.1 mmol, 3.9 equiv.), **4f** (152 mg, 0.9 mmol, 3.3 equiv.), BINOL (15.9 mg, 0.06 mmol, 20 mol%), MS  $4\text{\AA}$  (200 mg) and  $\text{CHCl}_3$  (3 mL) were used to obtain the corresponding **5aaf** as a yellow solid (13.6 mg, 11% yield). m.p. =



137.5-138.2°C. <sup>1</sup>H NMR (CDCl<sub>3</sub>, 400 MHz): δ 1.47-1.50 (t, CH<sub>3</sub>, 3H), 2.48-2.62 (m, CH<sub>2</sub>, 4H), 3.77 (m, CH<sub>2</sub>, 4H), 4.05-4.12 (q, CH<sub>2</sub>, 2H), 4.58 (s, CH, 1H), 6.67-6.77 (m, Ar, 3H), 7.62-7.66 (t, *J* = 8 Hz, Ar, 1H), 7.80-7.84 (t, *J* = 8 Hz, Ar, 1H), 7.90-8.00 (m, Ar, 3H), 8.37-8.39 (d, *J* = 8 Hz, Ar, 2H), 8.51-8.53 (d, *J* = 8 Hz, Ar, 1H), 10.27 (s br, OH, 1H). <sup>13</sup>C{<sup>1</sup>H} NMR (CDCl<sub>3</sub>, 100 MHz): δ 15.01, 52.48, 64.40, 66.96, 73.93, 111.84, 118.54, 119.91, 120.47, 122.35, 123.70, 124.51, 125.31, 127.67, 130.45, 130.87, 135.30, 138.35, 139.97, 144.44, 145.05, 145.80, 146.61, 147.62, 157.95, 182.42. HRMS (ESI-TOF) *m/z*: calcd. for C<sub>28</sub>H<sub>26</sub>O<sub>5</sub>N<sub>3</sub> [M]<sup>+</sup> 484.1867, found 484.1858.

*8-((2-hydroxy-3-methoxyphenyl)(morpholino)methyl)indolo[2,1-b]quinazoline-6,12-dione (5aag)*: **2a** (121 mg, 0.3 mmol), **3a** (0.1 mL, 1.1 mmol, 3.9 equiv.), **4g** (140 mg, 0.9 mmol, 3.3 equiv.), BINOL (15.9 mg, 0.06 mmol, 20 mol%), MS 4 Å (200 mg) and CHCl<sub>3</sub> (3 mL) were used to obtain the corresponding **5aag** as a yellow solid (18.0 mg, 11% yield). m.p. = 165.2-167°C. <sup>1</sup>H NMR (CDCl<sub>3</sub>, 400 MHz): δ 2.49-2.64 (m, CH<sub>2</sub>, 4H), 3.78 (s br, CH<sub>2</sub>, 4H), 3.88 (s, OMe, 3H), 4.57 (s, CH, 1H), 6.66 (m, Ar, 1H), 6.74-6.78 (t, *J* = 8 Hz, Ar, 2H), 7.62-7.66 (t, *J* = 8 Hz, Ar, 1H), 7.80-7.84 (t, *J* = 8 Hz, Ar, 1H), 7.89-8.00 (m, Ar, 3H), 8.36-8.38 (d, *J* = 8 Hz, Ar, 1H), 8.51-8.53 (m, Ar, 1H), 10.75 (s br, OH, 1H). <sup>13</sup>C{<sup>1</sup>H} NMR (CDCl<sub>3</sub>, 100 MHz): δ 52.45, 56.00, 66.94, 74.51, 110.81, 118.61, 119.98, 120.63, 122.37, 123.68, 125.32, 127.68, 130.48, 130.88, 135.32, 138.36, 144.39, 145.00, 146.60, 157.95, 182.36. HRMS (ESI-TOF) *m/z*: calcd. for C<sub>27</sub>H<sub>24</sub>O<sub>5</sub>N<sub>3</sub> [M]<sup>+</sup> 470.1711, found 470.1702.

*8-((3-(tert-butyl)-2-hydroxyphenyl)(morpholino)methyl)indolo[2,1-b]quinazoline-6,12-dione (5aai)*: **2a** (102 mg, 0.3 mmol), **3a** (0.1 mL, 1.1 mmol, 3.9 equiv.), **4i** (163 mg, 0.9 mmol, 3.3 equiv.), BINOL (15.9 mg, 0.06 mmol, 20 mol%), MS 4 Å (200 mg) and CHCl<sub>3</sub> (3 mL) were used to obtain the corresponding **5aai** as a yellow solid (50 mg, 36% yield). m.p. = 254°C decomp. <sup>1</sup>H NMR (CDCl<sub>3</sub>, 400 MHz): δ 1.43 (s, CH<sub>3</sub>, 9H), 2.45-2.70 (m, CH<sub>2</sub>, 4H), 3.80 (s, CH<sub>2</sub>, 4H), 4.49 (s, CH, 1H), 6.68-6.72 (t, *J* = 8 Hz, Ar, 1H), 6.82-6.84 (d, *J* = 8 Hz, Ar, 1H), 7.17-7.19 (d, *J* = 8 Hz, Ar, 1H), 7.65-7.69 (t, *J* = 8 Hz, Ar, 1H), 7.83-7.87 (t, *J* = 8 Hz, Ar, 1H), 7.92-8.03 (m, Ar, 3H), 8.41-8.43 (d, *J* = 8 Hz, Ar, 1H), 8.55-8.57 (d, *J* = 8 Hz, Ar, 1H), 11.73 (s, OH, 1H). <sup>13</sup>C{<sup>1</sup>H} NMR (CDCl<sub>3</sub>, 100 MHz): δ 29.40, 34.91, 66.68, 76.51, 118.54, 119.23, 123.54, 123.63, 125.25, 126.53, 127.08, 127.61, 130.35, 130.82, 135.20, 137.97, 138.16, 139.29, 145.82, 154.94, 163.24, 182.23. HRMS (ESI-TOF) *m/z*: calcd. for C<sub>30</sub>H<sub>29</sub>O<sub>4</sub>N<sub>3</sub>Na [M]<sup>+</sup> 518.2050, found 518.2042.

*2-((2-hydroxyphenyl)(morpholino)methyl)indolo[2,1-b]quinazoline-6,12-dione (5baa)*: **2b** (103 mg, 0.3 mmol), **3a** (0.1 mL, 1.1 mmol, 3.9 equiv.), **4a** (0.1 mL, 0.9 mmol, 3.3 equiv.),

BINOL (15.9 mg, 0.06 mmol, 20 mol%), MS 4Å (200 mg) and CHCl<sub>3</sub> (3 mL) were used to obtain the corresponding **5baa** as a yellow solid (100.9 mg, 80% yield). m.p.= 211.5°C decomp. <sup>1</sup>H NMR (CDCl<sub>3</sub>, 400 MHz): δ 2.45-2.65 (m, CH<sub>2</sub>, 4H), 3.71-3.76 (m, CH<sub>2</sub>, 4H), 4.60 (s, CH, 1H), 6.71-6.74 (t, Ar, 1H), 6.85-6.87 (d, *J*= 8 Hz, Ar, 1H), 6.97-6.99 (m, Ar, 1H), 7.10-7.14 (t, *J*= 8 Hz, Ar, 1H), 7.37-7.41 (t, *J*= 8 Hz, Ar, 1H), 7.73-7.77 (t, *J*= 8 Hz, Ar, 1H), 7.85-7.87 (d, *J*= 8 Hz, Ar, 1H), 7.93-7.95 (d, *J*= 8 Hz, Ar, 2H), 7.99 (m, Ar, 1H), 8.39 (s, Ar, 1H), 8.55-8.58 (d, *J*= 8 Hz, Ar, 1H), 11.37 (s br, OH, 1H). <sup>13</sup>C{<sup>1</sup>H} NMR (CDCl<sub>3</sub>, 100 MHz): δ 52.55, 66.86, 76.41, 117.64, 118.08, 120.20, 122.06, 123.71, 124.02, 125.62, 127.47, 127.51, 129.45, 129.53, 131.87, 134.87, 138.48, 142.37, 144.62, 146.31, 146.52, 155.94, 157.95, 182.46. HRMS (ESI-TOF) *m/z*: calcd. for C<sub>26</sub>H<sub>22</sub>O<sub>4</sub>N<sub>3</sub> [M]<sup>+</sup> 440.1605, found 440.1598.

*2-((2-hydroxyphenyl)(piperidin-1-yl)methyl)indolo[2,1-b]quinazoline-6,12-dione* (**5bca**): **2b** (85 mg, 0.3 mmol), **3c** (0.1 mL, 1.1 mmol, 3.9 equiv.), **4a** (0.1 mL, 0.9 mmol, 3.3 equiv.), BINOL (15.9 mg, 0.06 mmol, 20 mol%), MS 4Å (200 mg) and CHCl<sub>3</sub> (3 mL) were used to obtain the corresponding **5bca** as a green solid (61.8 mg, 60% yield). m.p.= 197.8°C decomp. <sup>1</sup>H NMR (CDCl<sub>3</sub>, 400 MHz): δ 1.48 (s br, CH<sub>2</sub>, 2H), 1.65 (s br, CH<sub>2</sub>, 4H), 2.42-2.62 (m, CH<sub>2</sub>, 4H), 4.65 (s, CH, 1H), 6.68-6.71 (t, Ar, 1H), 6.85-6.87 (d, *J*= 8 Hz, Ar, 1H), 6.90-6.92 (d, *J*= 8 Hz, Ar, 1H), 7.09-7.13 (t, *J*= 8 Hz, Ar, 1H), 7.35-7.39 (t, *J*= 8 Hz, Ar, 1H), 7.70-7.74 (t, *J*= 8 Hz, Ar, 1H), 7.84-7.85 (d, *J*= 4 Hz, Ar, 1H), 7.92-7.97 (m, Ar, 2H), 8.36 (s, Ar, 1H), 8.54-8.56 (d, *J*= 8 Hz, Ar, 1H), 11.90 (s br, OH, 1H). <sup>13</sup>C{<sup>1</sup>H} NMR (CDCl<sub>3</sub>, 100 MHz): δ 24.06, 26.06, 76.10, 117.38, 117.93, 119.53, 121.97, 123.75, 124.51, 125.45, 127.34, 127.44, 129.01, 129.14, 131.50, 138.32, 142.80, 144.40, 146.21, 146.22, 156.83, 157.95, 182.40. HRMS (ESI-TOF) *m/z*: calcd. for C<sub>27</sub>H<sub>24</sub>O<sub>4</sub>N<sub>3</sub> [M]<sup>+</sup> 438.1812, found 438.1802.

*2-((benzyl(methyl)amino)(2-hydroxyphenyl)methyl)indolo[2,1-b]quinazoline-6,12-dione* (**5bea**): **2b** (107 mg, 0.3 mmol), **3e** (0.14 mL, 1.1 mmol, 3.9 equiv.), **4a** (0.1 mL, 0.9 mmol, 3.3 equiv.), BINOL (15.9 mg, 0.06 mmol, 20 mol%), MS 4Å (200 mg) and CHCl<sub>3</sub> (3 mL) were used to obtain the corresponding **5bea** as a yellow solid (21.4 mg, 15% yield). m.p.= 194°C decomp. <sup>1</sup>H NMR (CDCl<sub>3</sub>, 400 MHz): δ 2.21 (s, CH<sub>3</sub>, 3H), 3.56-3.79 (m, CH<sub>2</sub>, 2H), 4.86 (s, CH, 1H), 6.74-6.78 (t, *J*= 8 Hz, Ar, 1H), 6.93-6.99 (m, Ar, 2H), 7.15-7.19 (t, *J*= 8 Hz, Ar, 1H), 7.27-7.37 (m, Ar, 5H), 7.39-7.43 (t, *J*= 8 Hz, Ar, 1H), 7.75-7.79 (t, *J*= 8 Hz, Ar, 1H), 7.88-7.90 (d, *J*= 8 Hz, Ar, 1H), 7.99-8.01 (m, Ar, 1H), 8.09-8.11 (m, Ar, 1H), 8.46 (s, Ar, 1H), 8.59-8.61 (d, *J*= 8 Hz, Ar, 1H), 11.95 (s br, OH, 1H). <sup>13</sup>C{<sup>1</sup>H} NMR (CDCl<sub>3</sub>, 100 MHz): δ 39.67, 60.01, 75.32, 117.60, 118.06, 119.83, 122.05, 123.94, 124.51, 125.58, 127.45, 127.63, 127.95, 128.85, 129.13, 129.40, 129.46, 131.69,

135.16, 138.52, 138.44, 142.49, 144.56, 146.31, 146.44, 156.63, 158.01, 182.48. HRMS (ESI-TOF) m/z: calcd. for C<sub>30</sub>H<sub>24</sub>O<sub>3</sub>N<sub>3</sub> [M]<sup>+</sup> 474.1812, found 474.1804.

*2-((3,5-di-tert-butyl-2-hydroxyphenyl)(morpholino)methyl)indolo[2,1-b]quinazoline-6,12-dione (5bac)*: **2b** (96 mg, 0.3 mmol), **3a** (0.1 mL, 1.1 mmol, 3.9 equiv.), **4c** (215 mg, 0.9 mmol, 3.3 equiv.), BINOL (15.9 mg, 0.06 mmol, 20 mol%), MS 4Å (200 mg) and CHCl<sub>3</sub> (3 mL) were used to obtain the corresponding **5bac** as a yellow solid (20.3 mg, 14% yield). m.p.= 115.3-117°C. <sup>1</sup>H NMR (CDCl<sub>3</sub>, 400 MHz): δ 1.20 (s, CH<sub>3</sub>, 9H), 1.45 (s, CH<sub>3</sub>, 9H), 2.46-2.47 (m, CH<sub>2</sub>, 4H), 3.74-3.78 (m, CH<sub>2</sub>, 4H), 4.57 (s, CH, 1H), 6.83-6.84 (d, *J*= 8 Hz, Ar, 1H), 7.19-7.20 (d, *J*= 8 Hz, Ar, 1H), 7.38-7.41 (t, Ar, 1H), 7.72-7.77 (m, Ar, 1H), 7.87-7.88 (d, *J*= 4 Hz, Ar, 1H), 7.93-7.95 (d, *J*= 8 Hz, Ar, 1H), 8.05-8.09 (m, Ar, 1H), 8.46 (s br, Ar, 1H), 8.57-8.59 (d, *J*= 8 Hz, Ar, 1H), 11.60 (s br, OH, 1H). <sup>13</sup>C{<sup>1</sup>H} NMR (CDCl<sub>3</sub>, 100 MHz): δ 29.67, 31.70, 34.29, 35.22, 66.83, 77.30, 118.04, 122.01, 122.81, 123.70, 123.91, 124.00, 125.55, 127.41, 127.59, 129.60, 131.74, 135.11, 136.95, 138.42, 141.55, 142.95, 144.48, 146.28, 146.31, 152.42, 158.01, 182.52. HRMS (ESI-TOF) m/z: calcd. for C<sub>34</sub>H<sub>38</sub>O<sub>4</sub>N<sub>3</sub> [M]<sup>+</sup> 552.2857, found 552.2844.

*2-((5-bromo-2-hydroxyphenyl)(morpholino)methyl)indolo[2,1-b]quinazoline-6,12-dione (5bad)*: **2b** (95 mg, 0.3 mmol), **3a** (0.1 mL, 1.1 mmol, 3.9 equiv.), **4d** (184 mg, 0.9 mmol, 3.3 equiv.), BINOL (15.9 mg, 0.06 mmol, 20 mol%), MS 4Å (200 mg) and CHCl<sub>3</sub> (3 mL) were used to obtain the corresponding **5bad** as a green solid (80.3 mg, 59% yield). m.p.= 179.1-183°C. <sup>1</sup>H NMR (CDCl<sub>3</sub>, 400 MHz): δ 2.45-2.64 (m, CH<sub>2</sub>, 4H), 3.77 (m, CH<sub>2</sub>, 4H), 4.55 (s, CH, 1H), 6.77-6.79 (d, *J*= 8 Hz, Ar, 1H), 7.09-7.10 (d, *J*= 4 Hz, Ar, 1H), 7.22-7.24 (d, *J*= 8 Hz, Ar, 1H), 7.40-7.44 (t, *J*= 8 Hz, Ar, 1H), 7.76-7.80 (t, *J*= 8 Hz, Ar, 1H), 7.88-7.90 (d, *J*= 8 Hz, Ar, 1H), 7.97-7.99 (m, Ar, 2H), 8.39 (s, Ar, 1H), 8.58-8.60 (d, *J*= 8 Hz, Ar, 1H), 11.56 (s br, OH, 1H). <sup>13</sup>C{<sup>1</sup>H} NMR (CDCl<sub>3</sub>, 100 MHz): δ 66.78, 75.91, 117.71, 118.06, 119.57, 121.99, 124.11, 125.63, 125.76, 127.45, 127.55, 131.89, 131.95, 132.27, 134.73, 138.52, 141.55, 144.71, 146.24, 146.68, 155.19, 157.83, 182.40. HRMS (ESI-TOF) m/z: calcd. for C<sub>26</sub>H<sub>21</sub>O<sub>4</sub>N<sub>3</sub>Br [M]<sup>+</sup> 518.0710, found 518.0701.

*2-((3-ethoxy-2-hydroxyphenyl)(morpholino)methyl)indolo[2,1-b]quinazoline-6,12-dione (5baf)*: **2b** (99 mg, 0.3 mmol), **3a** (0.1 mL, 1.1 mmol, 3.9 equiv.), **4f** (152 mg, 0.9 mmol, 3.3 equiv.), BINOL (15.9 mg, 0.06 mmol, 20 mol%), MS 4Å (200 mg) and CHCl<sub>3</sub> (3 mL) were used to obtain the corresponding **5baf** as a yellow solid (47.7 mg, 36% yield). m.p.= 99.8-101.2°C. <sup>1</sup>H NMR (CDCl<sub>3</sub>, 400 MHz): δ 1.44-1.48 (t, *J*= 8 Hz, CH<sub>3</sub>, 3H), 2.44-2.63 (m, CH<sub>2</sub>, 4H), 3.71-3.80 (m, CH<sub>2</sub>, 4H), 4.02-4.07 (q, CH<sub>2</sub>, 2H), 4.67 (s, CH, 1H), 6.68-6.75 (m, Ar, 3H), 7.34-7.38 (t, *J*= 8 Hz, Ar, 1H), 7.70-7.74 (t, *J*= 8 Hz, Ar, 1H), 7.82-7.84

(d,  $J = 8$  Hz, Ar, 1H), 7.90-7.92 (d,  $J = 8$  Hz, Ar, 1H), 8.02-8.06 (m, Ar, 1H), 8.38 (s, Ar, 1H), 8.52-8.54 (d,  $J = 8$  Hz, Ar, 1H), 10.61 (s br, OH, 1H).  $^{13}\text{C}\{^1\text{H}\}$  NMR ( $\text{CDCl}_3$ , 100 MHz):  $\delta$  14.95, 52.45, 64.29, 66.87, 74.51, 111.87, 117.90, 119.77, 120.71, 121.92, 123.73, 124.39, 125.44, 127.30, 127.33, 131.63, 134.75, 138.31, 142.93, 144.36, 145.09, 146.15, 146.20, 147.60, 157.86, 182.36. HRMS (ESI-TOF)  $m/z$ : calcd. for  $\text{C}_{28}\text{H}_{26}\text{O}_5\text{N}_3$   $[\text{M}]^+$  484.1867, found 484.1859.

*2-((2-hydroxy-3-methoxyphenyl)(morpholino)methyl)indolo[2,1-b]quinazoline-6,12-dione (5bag)*: **2b** (94 mg, 0.3 mmol), **3a** (0.1 mL, 1.1 mmol, 3.9 equiv.), **4g** (140 mg, 0.9 mmol, 3.3 equiv.), BINOL (15.9 mg, 0.06 mmol, 20 mol%), MS  $4\text{\AA}$  (200 mg) and  $\text{CHCl}_3$  (3 mL) were used to obtain the corresponding **5bag** as a yellow solid (22.3 mg, 18% yield). m.p. = 133.8-135°C.  $^1\text{H}$  NMR ( $\text{CDCl}_3$ , 400 MHz):  $\delta$  2.46-2.66 (m,  $\text{CH}_2$ , 4H), 3.77-3.81 (m,  $\text{CH}_2$ , 4H), 3.87 (s, OMe, 3H), 4.67 (s, CH, 1H), 6.66-6.77 (m, Ar, 3H), 7.38-7.42 (t,  $J = 8$  Hz, Ar, 1H), 7.74-7.78 (t,  $J = 8$  Hz, Ar, 1H), 7.86 (m, Ar, 1H), 7.93-7.95 (d,  $J = 8$  Hz, Ar, 1H), 8.03-8.08 (m, Ar, 1H), 8.39-8.40 (m, Ar, 1H), 8.57-8.59 (d,  $J = 8$  Hz, Ar, 1H), 11.04 (s br, OH, 1H).  $^{13}\text{C}\{^1\text{H}\}$  NMR ( $\text{CDCl}_3$ , 100 MHz):  $\delta$  52.50, 55.96, 66.92, 75.11, 110.83, 118.00, 119.90, 120.90, 121.99, 123.84, 124.24, 125.55, 127.41, 127.43, 129.57, 134.79, 138.42, 142.68, 144.48, 145.07, 146.24, 146.36, 148.42, 157.93, 182.44. HRMS (ESI-TOF)  $m/z$ : calcd. for  $\text{C}_{27}\text{H}_{24}\text{O}_5\text{N}_3$   $[\text{M}]^+$  470.1711, found 470.1702.

*2-fluoro-8-((2-hydroxyphenyl)(morpholino)methyl)indolo[2,1-b]quinazoline-6,12-dione (5caa)*: **2c** (108 mg, 0.26 mmol), **3a** (0.1 mL, 1.1 mmol, 3.9 equiv.), **4a** (0.1 mL, 0.9 mmol, 3.3 equiv.), BINOL (14.9 mg, 0.05 mmol, 20 mol%), MS  $4\text{\AA}$  (200 mg) and  $\text{CHCl}_3$  (3 mL) were used to obtain the corresponding **5caa** as a yellow solid (12.7 mg, 10% yield). m.p. = 210.3°C decomp.  $^1\text{H}$  NMR ( $\text{CDCl}_3$ , 400 MHz):  $\delta$  2.48-2.51 (m,  $\text{CH}_2$ , 2H), 2.65 (m,  $\text{CH}_2$ , 2H), 3.79 (m,  $\text{CH}_2$ , 4H), 4.51 (s, CH, 1H), 6.75-6.78 (t, Ar, 1H), 6.88-6.90 (d,  $J = 8$  Hz, Ar, 1H), 6.96-6.98 (d,  $J = 8$  Hz, Ar, 1H), 7.14-7.18 (t,  $J = 8$  Hz, Ar, 1H), 7.52-7.57 (m, Ar, 1H), 7.89-7.91 (d,  $J = 8$  Hz, Ar, 1H), 7.97-8.05 (m, Ar, 3H), 8.53-8.55 (d,  $J = 8$  Hz, Ar, 1H), 11.29 (s br, OH, 1H).  $^{13}\text{C}\{^1\text{H}\}$  NMR ( $\text{CDCl}_3$ , 100 MHz):  $\delta$  52.50, 66.84, 76.13, 113.36, 113.60, 117.75, 118.73, 120.26, 122.63, 123.48, 123.64, 123.72, 125.39, 125.56, 125.65, 129.11, 129.58, 133.31, 133.40, 138.39, 139.54, 143.25, 143.93, 145.73, 155.89, 157.13, 162.07, 164.60, 182.00. HRMS (ESI-TOF)  $m/z$ : calcd. for  $\text{C}_{26}\text{H}_{21}\text{O}_4\text{N}_3\text{F}$   $[\text{M}]^+$  458.1511, found 458.1503.

*8-((3-(tert-butyl)-2-hydroxyphenyl)(morpholino)methyl)-2-fluoroindolo[2,1-b]quinazoline-6,12-dione (5cai)*: **2c** (100 mg, 0.26 mmol), **3a** (0.1 mL, 1.1 mmol, 3.9 equiv.), **4i** (155 mg, 0.9 mmol, 3.3 equiv.), BINOL (14.9 mg, 0.05 mmol, 20 mol%), MS  $4\text{\AA}$  (200 mg) and

CHCl<sub>3</sub> (3 mL) were used to obtain the corresponding **5cai** as a yellow solid (21 mg, 16% yield). m.p.= 253°C decomp. <sup>1</sup>H NMR (CDCl<sub>3</sub>, 400 MHz): δ 1.43 (s, CH<sub>3</sub>, 9H), 2.51-2.66 (m, CH<sub>2</sub>, 4H), 3.80 (s, CH<sub>2</sub>, 4H), 4.49 (s, CH, 1H), 6.68-6.72 (t, *J*= 8 Hz, Ar, 1H), 6.81-6.83 (d, *J*= 8 Hz, Ar, 1H), 7.17-7.19 (d, *J*= 8 Hz, Ar, 1H), 7.53-7.57 (t, *J*= 8 Hz, Ar, 1H), 7.93-8.07 (m, Ar, 4H), 8.54-8.56 (d, *J*= 8 Hz, Ar, 1H), 11.71 (s, OH, 1H). <sup>13</sup>C{<sup>1</sup>H} NMR (CDCl<sub>3</sub>, 100 MHz): δ 29.39, 34.91, 66.67, 76.51, 113.23, 113.48, 118.58, 119.25, 123.32, 123.50, 123.56, 125.32, 126.56, 127.07, 133.18, 133.27, 138.01, 138.18, 139.61, 143.19, 143.81, 143.84, 145.54, 154.93, 181.90. HRMS (ESI-TOF) m/z: calcd. for C<sub>30</sub>H<sub>27</sub>O<sub>4</sub>N<sub>3</sub>F [M]<sup>-</sup> 512.1991, found 512.1990.

*8-fluoro-2-((2-hydroxyphenyl)(morpholino)methyl)indolo[2,1-b]quinazoline-6,12-dione (5daa)*: **2d** (90 mg, 0.26 mmol), **3a** (0.1 mL, 1.1 mmol, 3.9 equiv.), **4a** (0.1 mL, 0.9 mmol, 3.3 equiv.), BINOL (14.9 mg, 0.05 mmol, 20 mol%), MS 4Å (200 mg) and CHCl<sub>3</sub> (3 mL) were used to obtain the corresponding **5daa** as a yellow solid (22.1 mg, 20% yield). m.p.= 193.5°C decomp. <sup>1</sup>H NMR (CDCl<sub>3</sub>, 400 MHz): δ 2.52-2.69 (m, CH<sub>2</sub>, 4H), 3.80 (m, CH<sub>2</sub>, 4H), 4.68 (s, CH, 1H), 6.74-6.78 (t, *J*= 8 Hz, Ar, 1H), 6.88-6.90 (d, *J*= 8 Hz, Ar, 1H), 7.05 (s, Ar, 1H), 7.13-7.17 (t, *J*= 8 Hz, Ar, 1H), 7.44-7.49 (m, Ar, 1H), 7.53-7.56 (m, Ar, 1H), 7.94-7.96 (d, *J*= 8 Hz, Ar, 1H), 8.07 (s, Ar, 1H), 8.41 (s, Ar, 1H), 8.57-8.60 (m, Ar, 1H), 11.45 (s br, OH, 1H). <sup>13</sup>C{<sup>1</sup>H} NMR (CDCl<sub>3</sub>, 100 MHz): δ 52.52, 66.64, 112.15, 112.40, 117.59, 119.71, 119.79, 120.28, 123.41, 123.49, 123.94, 124.89, 125.12, 127.46, 129.40, 129.61, 131.96, 134.98, 142.39, 144.56, 146.34, 155.82, 157.66, 160.04, 162.54, 181.54. HRMS (ESI-TOF) m/z: calcd. for C<sub>26</sub>H<sub>21</sub>O<sub>4</sub>N<sub>3</sub>F [M]<sup>+</sup> 458.1511, found 458.1501.

*8-fluoro-2-((2-hydroxyphenyl)(piperidin-1-yl)methyl)indolo[2,1-b]quinazoline-6,12-dione (5dca)*: **2d** (77 mg, 0.26 mmol), **3c** (0.1 mL, 1.1 mmol, 3.9 equiv.), **4a** (0.1 mL, 0.9 mmol, 3.3 equiv.), BINOL (14.9 mg, 0.05 mmol, 20 mol%), MS 4Å (200 mg) and CHCl<sub>3</sub> (3 mL) were used to obtain the corresponding **5dca** as a yellow solid (32 mg, 34% yield). m.p.= 209.9°C decomp. <sup>1</sup>H NMR (CDCl<sub>3</sub>, 400 MHz): δ 1.49-1.67 (m, CH<sub>2</sub>, 6H), 2.45 (m, CH<sub>2</sub>, 4H), 4.69 (s, CH, 1H), 6.69-6.73 (t, *J*= 8 Hz, Ar, 1H), 6.86-6.88 (d, *J*= 8 Hz, Ar, 1H), 6.95 (s, Ar, 1H), 7.10-7.14 (t, *J*= 8 Hz, Ar, 1H), 7.43-7.48 (m, Ar, 1H), 7.53-7.55 (m, Ar, 1H), 7.93-7.95 (d, *J*= 8 Hz, Ar, 1H), 8.02 (s, Ar, 1H), 8.37 (s, Ar, 1H), 8.57-8.61 (m, Ar, 1H), 12.13 (s br, OH, 1H). <sup>13</sup>C{<sup>1</sup>H} NMR (CDCl<sub>3</sub>, 100 MHz): δ 24.02, 25.94, 52.97, 75.89, 112.09, 112.34, 117.44, 119.70, 119.77, 113.43, 123.51, 123.78, 124.35, 124.83, 125.07, 127.47, 129.16, 131.73, 135.22, 142.41, 142.43, 143.06, 144.41, 146.16, 156.74, 157.78, 160.00, 162.49, 181.58. HRMS (ESI-TOF) m/z: calcd. for C<sub>27</sub>H<sub>23</sub>O<sub>3</sub>N<sub>3</sub>F [M]<sup>+</sup> 456.1718, found 456.1709.

2-((5-bromo-2-hydroxyphenyl)(morpholino)methyl)-8-fluoroindolo[2,1-b]quinazoline-6,12-dione (**5dad**): **2d** (75 mg, 0.26 mmol), **3a** (0.1 mL, 1.1 mmol, 3.9 equiv.), **4d** (172.5 mg, 0.9 mmol, 3.3 equiv.), BINOL (14.9 mg, 0.05 mmol, 20 mol%), MS 4Å (200 mg) and CHCl<sub>3</sub> (3 mL) were used to obtain the corresponding **5dad** as a yellow solid (16.5 mg, 16% yield). m.p.= 192.2-194°C. <sup>1</sup>H NMR (CDCl<sub>3</sub>, 400 MHz): δ 2.54-2.69 (m, CH<sub>2</sub>, 4H), 3.81 (s, CH<sub>2</sub>, 4H), 4.62 (s, CH, 1H), 6.81-6.83 (d, *J*= 8 Hz, Ar, 1H), 7.17 (s br, Ar, 1H), 7.24 (s, Ar, 1H), 7.48-7.52 (m, Ar, 1H), 7.56-7.58 (m, Ar, 1H), 7.97-8.03 (m, Ar, 2H), 8.42 (s, Ar, 1H), 8.59-8.62 (m, Ar, 1H), 11.62 (s br, OH, 1H). <sup>13</sup>C{<sup>1</sup>H} NMR (CDCl<sub>3</sub>, 100 MHz): δ 52.53, 66.58, 75.71, 111.87, 112.26, 112.50, 119.60, 119.79, 119.87, 123.41, 123.49, 124.13, 125.01, 125.25, 127.51, 131.92, 132.15, 132.47, 142.39, 144.71, 146.61, 155.11, 157.61, 160.12, 162.61, 181.57. HRMS (ESI-TOF) *m/z*: calcd. for C<sub>26</sub>H<sub>20</sub>O<sub>4</sub>N<sub>3</sub>BrF [M]<sup>+</sup> 536.0616, found 536.0609.

### 3.2. Asymmetric version:

**General Procedure:** In a round-bottom flask or in a Radley's® 12 position carousel reactor tube was added (2a) (0.3 mmol, 1.0 equiv.), (3a) (3.9 equiv.), (4a) (3.3 equiv.), chiral organocatalyst (20 mol%), MS 4Å (200 mg) and solvent (3 mL). The reaction was stirred at the indicated temperature and monitored by TLC. After cooling down, the reaction mixture was filtered with a porous plate glass funnel packed with a celite layer and washed with CHCl<sub>3</sub>. The solvent was evaporated under reduced pressure and the crude product purified by silica gel flash chromatography using hexane/AcOEt (5:1) to (1:1) as eluents.

**Table S1.** Reaction scope.
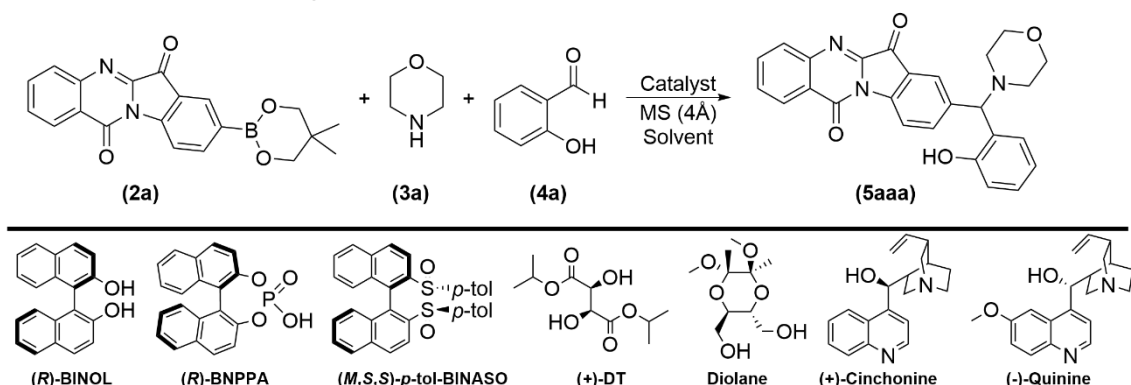

| Entry <sup>[a]</sup> | Catalyst                               | Solvent                         | Temp.(°C) | Time(h) | Yield(%) <sup>[b]</sup> | ee(%) <sup>[c]</sup> |
|----------------------|----------------------------------------|---------------------------------|-----------|---------|-------------------------|----------------------|
| 1                    | ( <i>R</i> )-BINOL                     | CHCl <sub>3</sub>               | 70        | 24      | 71                      | 99                   |
| 2                    | ( <i>R</i> )-BNPPA                     | CHCl <sub>3</sub>               | 70        | 24      | 41                      | <10                  |
| 3                    | <i>L</i> -(+)-DT                       | CHCl <sub>3</sub>               | 70        | 24      | 40                      | 86                   |
| 4                    | (+)-Cinchonine                         | CHCl <sub>3</sub>               | 70        | 24      | 42                      | <5                   |
| 5                    | (-)-Quinine                            | CHCl <sub>3</sub>               | 70        | 24      | 29                      | <5                   |
| 6                    | Diolane                                | CHCl <sub>3</sub>               | 70        | 24      | 32                      | 59                   |
| 7                    | ( <i>M,S,S</i> )- <i>p</i> -Tol-BINASO | CHCl <sub>3</sub>               | 70        | 24      | 32                      | <5                   |
| 8 <sup>[d]</sup>     | ( <i>R</i> )-BINOL                     | CHCl <sub>3</sub>               | 70        | 24      | 53                      | 75                   |
| 9                    | ( <i>R</i> )-BINOL                     | CH <sub>2</sub> Cl <sub>2</sub> | 50        | 24      | 56                      | <10                  |
| 10                   | ( <i>R</i> )-BINOL                     | MeTHF                           | 90        | 24      | 15                      | 55                   |
| 11                   | ( <i>R</i> )-BINOL                     | DCE                             | rt        | 96      | 19                      | 65                   |
| 12                   | ( <i>R</i> )-BINOL                     | DCE                             | 90        | 24      | 28                      | 86                   |

[a]Reaction conditions: **(2a)** (0.3 mmol), **(3a)** (1.1 mmol), **(4a)** (0.92 mmol), Catalyst (20 mol%), MS 4Å (200 mg) and CHCl<sub>3</sub> (3 mL) were added to a Radley's® 12 position carousel reactor tube under a nitrogen atmosphere and stirred at 70 °C for 24 hours. [b]Isolated yield. [c]Determined by chiral stationary phase HPLC (see Supporting Information for further details). [d]Reaction run with 1.2 equiv of **(3a)** and 1.2 equiv of **(4a)**.

**HPLC data:**

8-((2-hydroxyphenyl)(morpholino)methyl)indolo[2,1-*b*]quinazoline-6,12-dione (**5aaa**):  
 Daicel Chiralpak IA column, *n*-hexane/ethanol = 70:30, 0.8 mL/min, 254 nm, retention time: 129.440 (minor), 142.827 min (major).

Chrom Type: HPLC Channel : 1

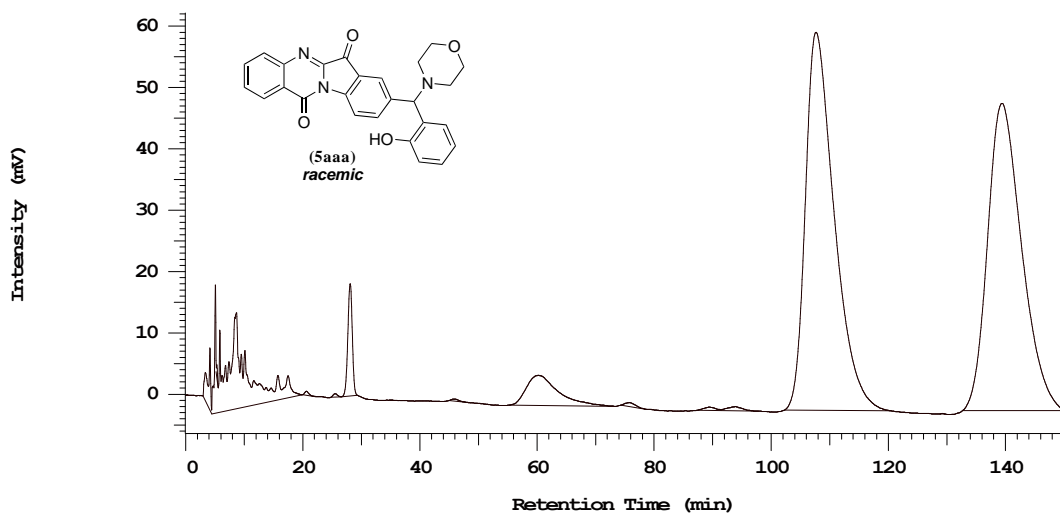

| No. | RT      | Area     | Conc 1 | BC |
|-----|---------|----------|--------|----|
| 31  | 107.633 | 20930378 | 43.283 | BB |
| 33  | 139.407 | 20037671 | 41.437 | BB |

Chrom Type: HPLC Channel : 1

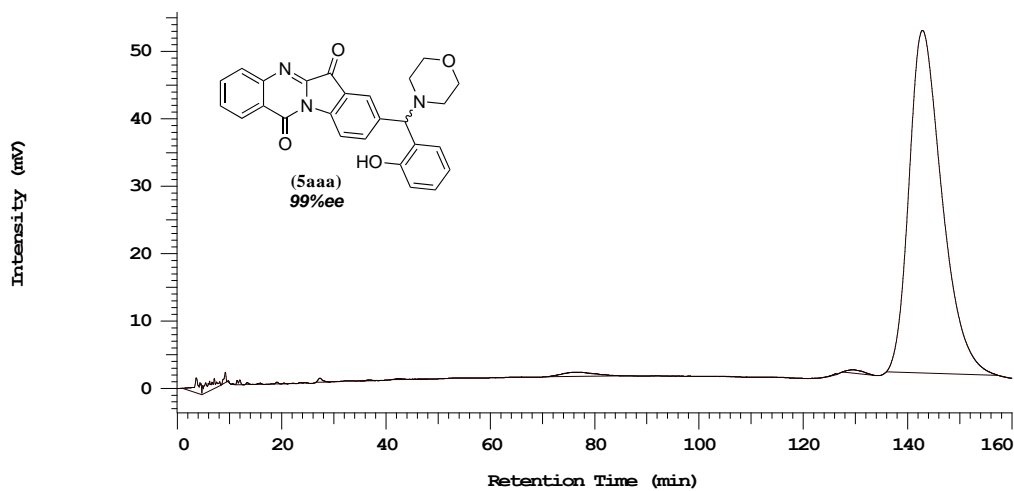

| No. | RT      | Area     | Conc 1 | BC |
|-----|---------|----------|--------|----|
| 32  | 129.440 | 113936   | 0.495  | BB |
| 33  | 142.827 | 22148810 | 96.140 | BB |



#### **4. References:**

- [1]. W. L. F. Amarego, D. D. Perrin in Purification of Laboratory Chemicals, 4th ed., Butterworth Heinemann, Oxford, UK, 1996.
- [2]. A. Kumar, V. D. Tripathi, P. Kumar, Green Chem., 2011, 13, 51-54; L. A. Onambele, H. Riepl, R. Fischer, G. Pradel, A. Prokop, M. N. Aminake, Int. J. Parasit. Drugs Drug Resist., 2015, 5, 48-57.
- [3]. T. Ishiyama, M. Murata, N. Miyaura, J. Org. Chem. 1995, 60, 7508-7510.

## NMR Spectra

$^1\text{H}$  NMR Spectra of **(2a)** (400 MHz,  $\text{CDCl}_3$ ):

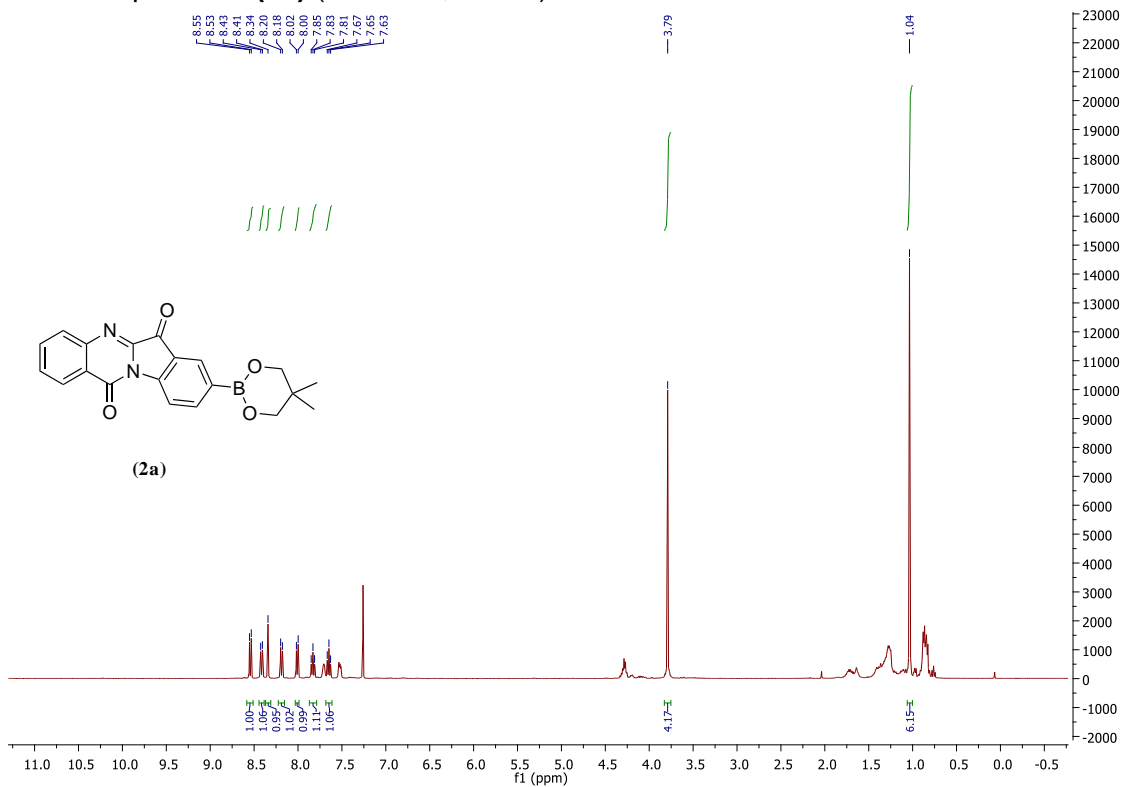

$^{13}\text{C}\{^1\text{H}\}$  APT NMR spectra of **(2a)** ( $\text{CDCl}_3$ , 100 MHz):

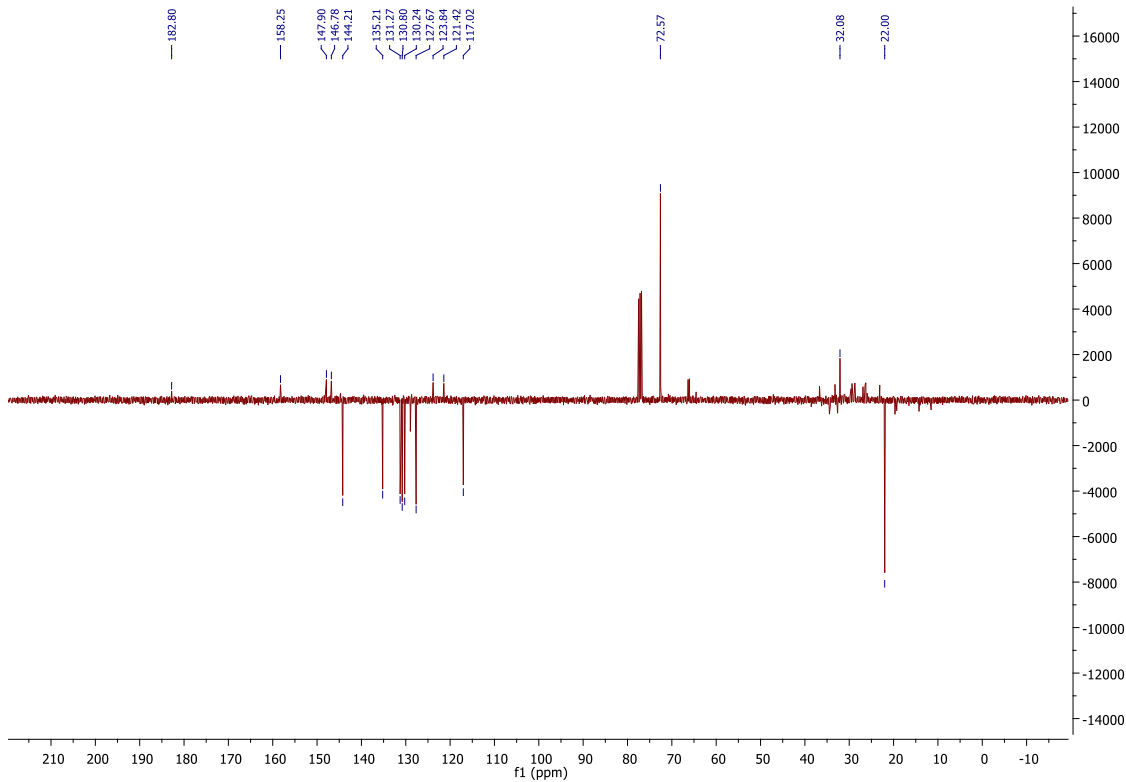

$^1\text{H}$  NMR Spectra of **(2b)** (400 MHz,  $\text{CDCl}_3$ ):

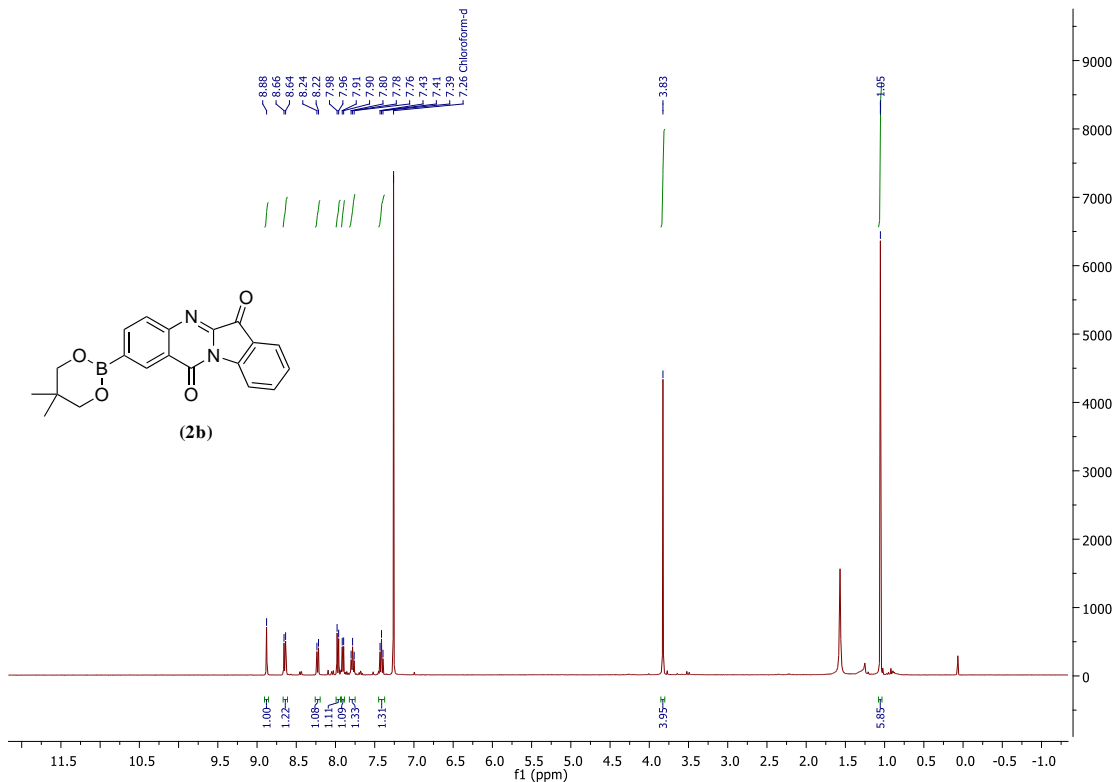

$^{13}\text{C}\{^1\text{H}\}$  NMR spectra of **(2b)** ( $\text{CDCl}_3$ , 100 MHz):

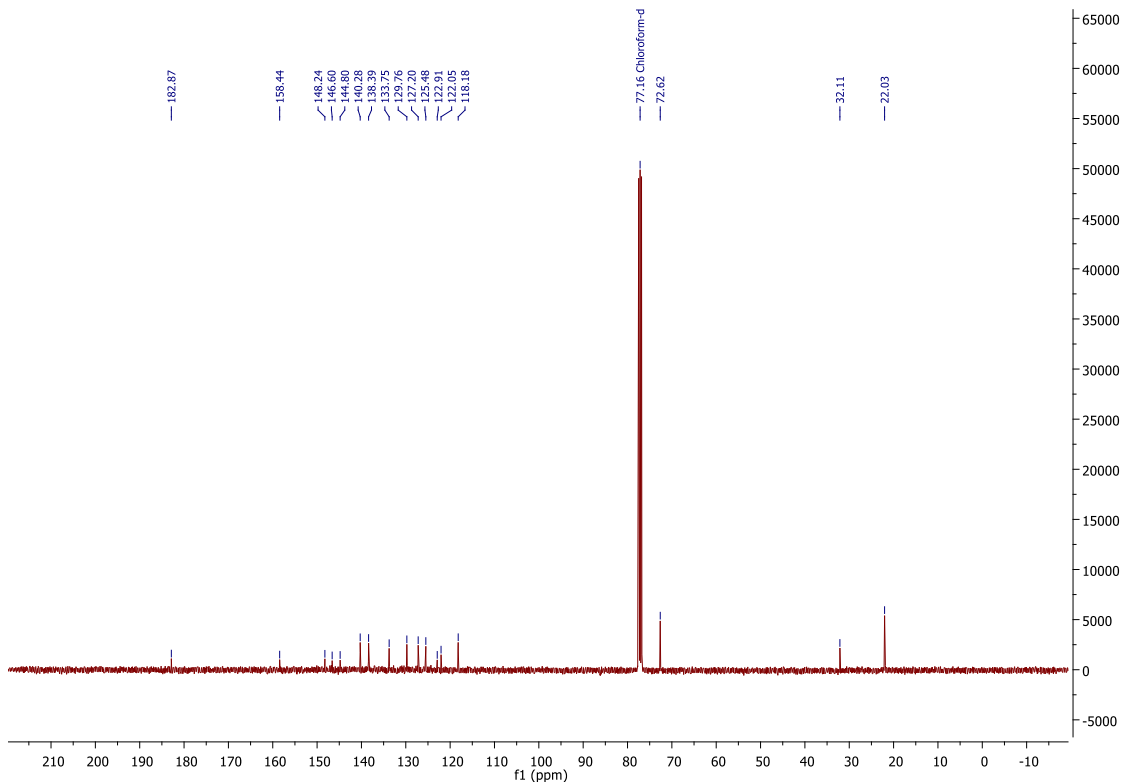

$^1\text{H}$  NMR Spectra of **(2c)** (400 MHz,  $\text{CDCl}_3$ ):

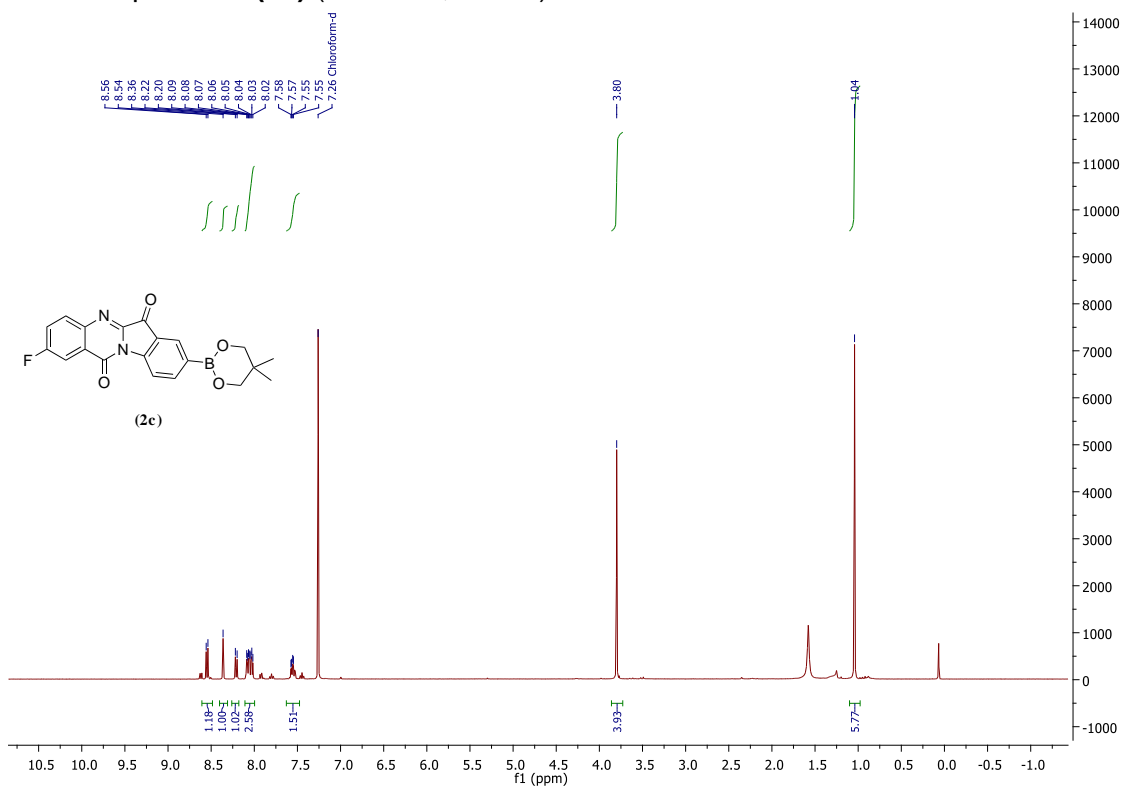

$^{13}\text{C}\{^1\text{H}\}$  NMR spectra of **(2c)** ( $\text{CDCl}_3$ , 100 MHz):

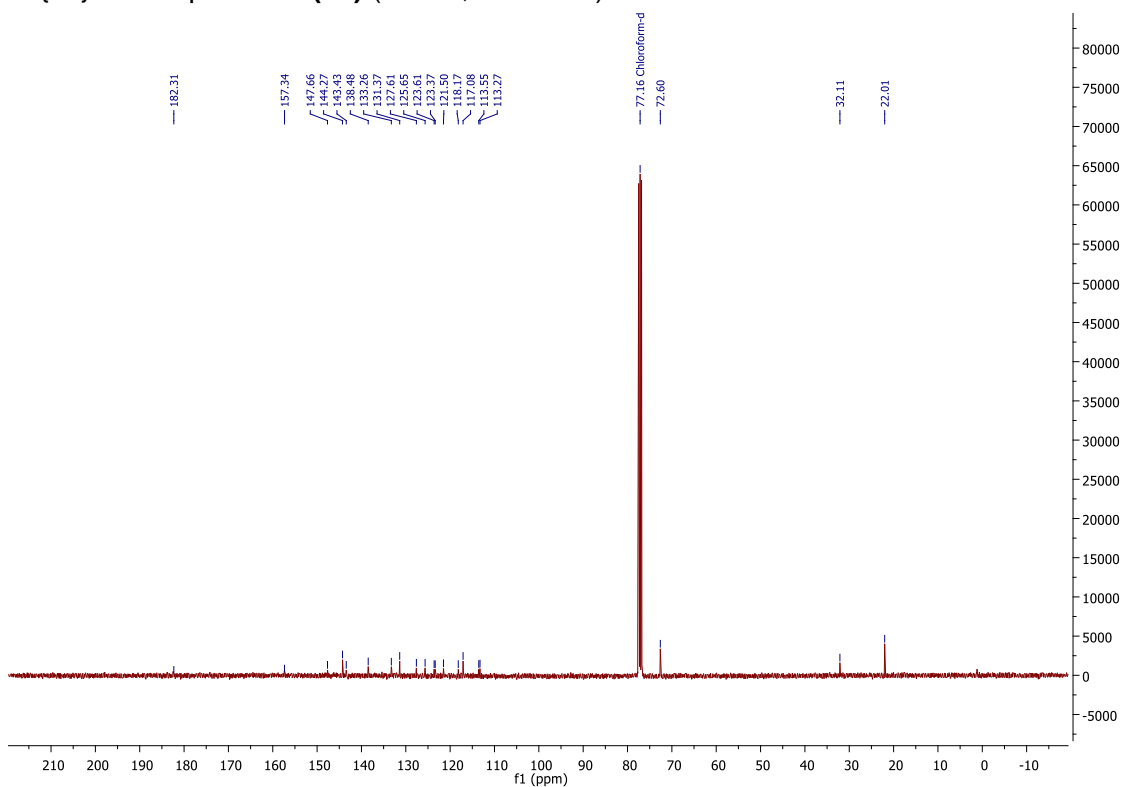

$^1\text{H}$  NMR Spectra of **(2d)** (400 MHz,  $\text{CDCl}_3$ ):

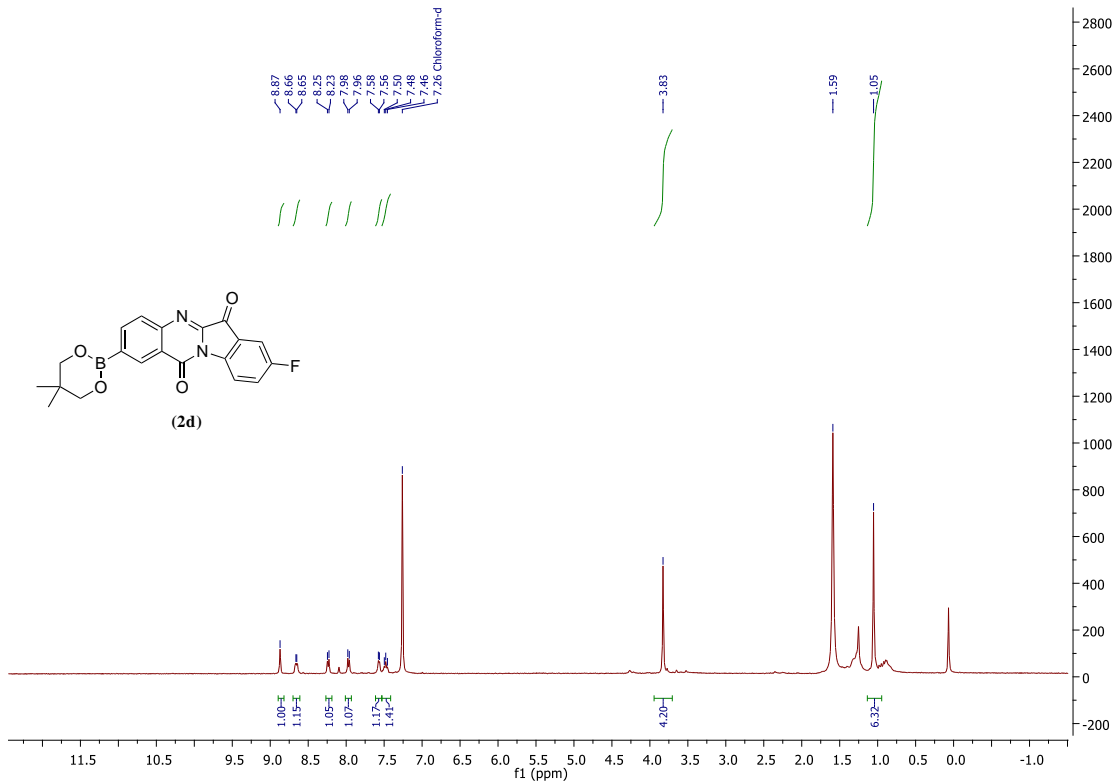

$^{13}\text{C}\{^1\text{H}\}$  NMR spectra of **(2d)** ( $\text{CDCl}_3$ , 100 MHz):

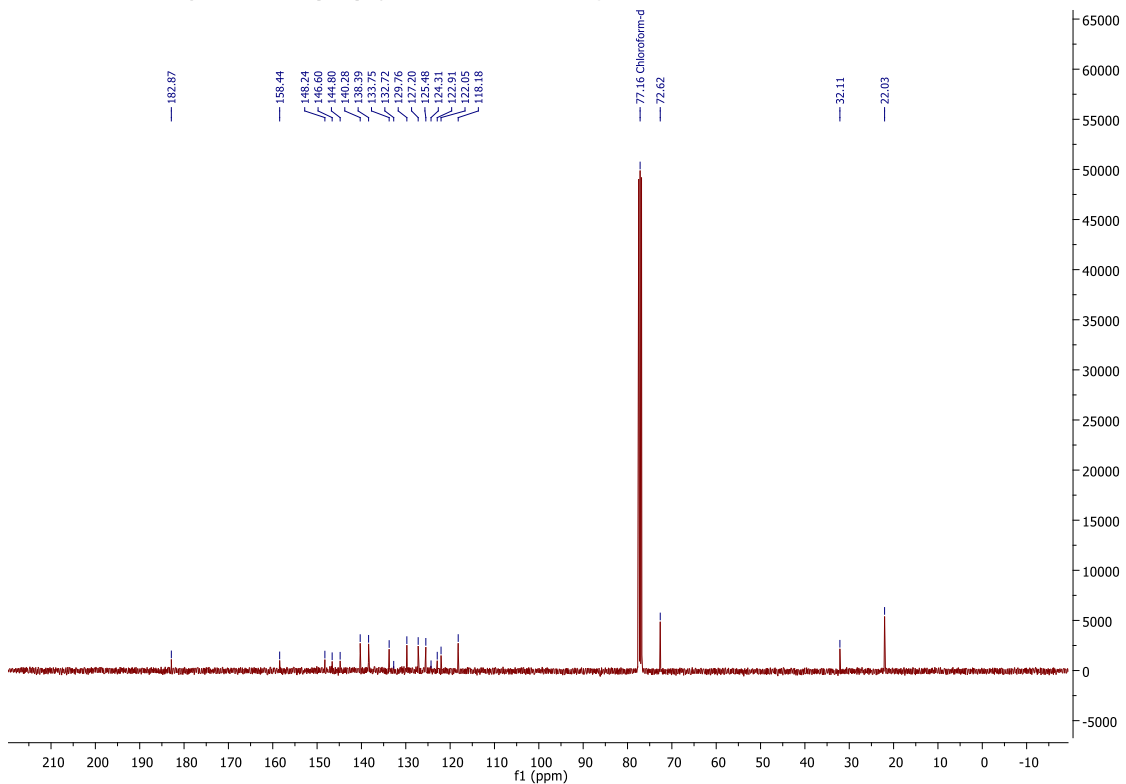

$^1\text{H}$  NMR Spectra of (**5aaa**) (400 MHz,  $\text{CDCl}_3$ ):

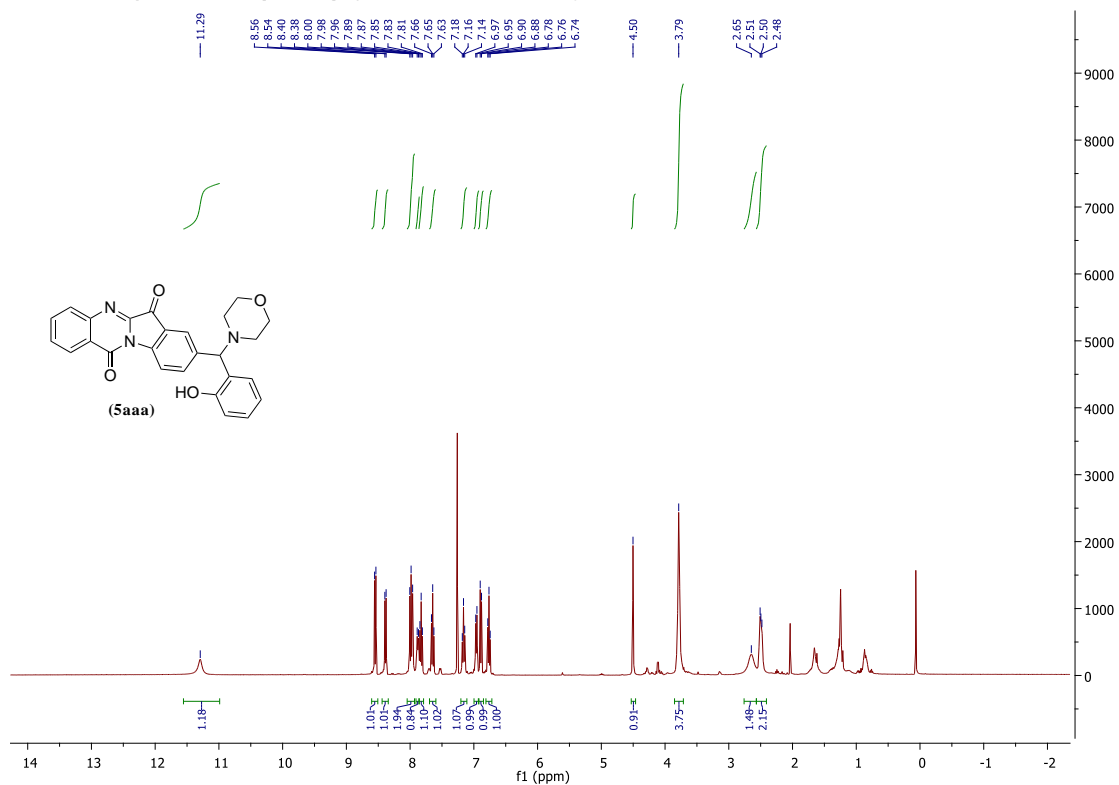

$^{13}\text{C}\{^1\text{H}\}$  APT NMR spectra of (**5aaa**) ( $\text{CDCl}_3$ , 100 MHz):

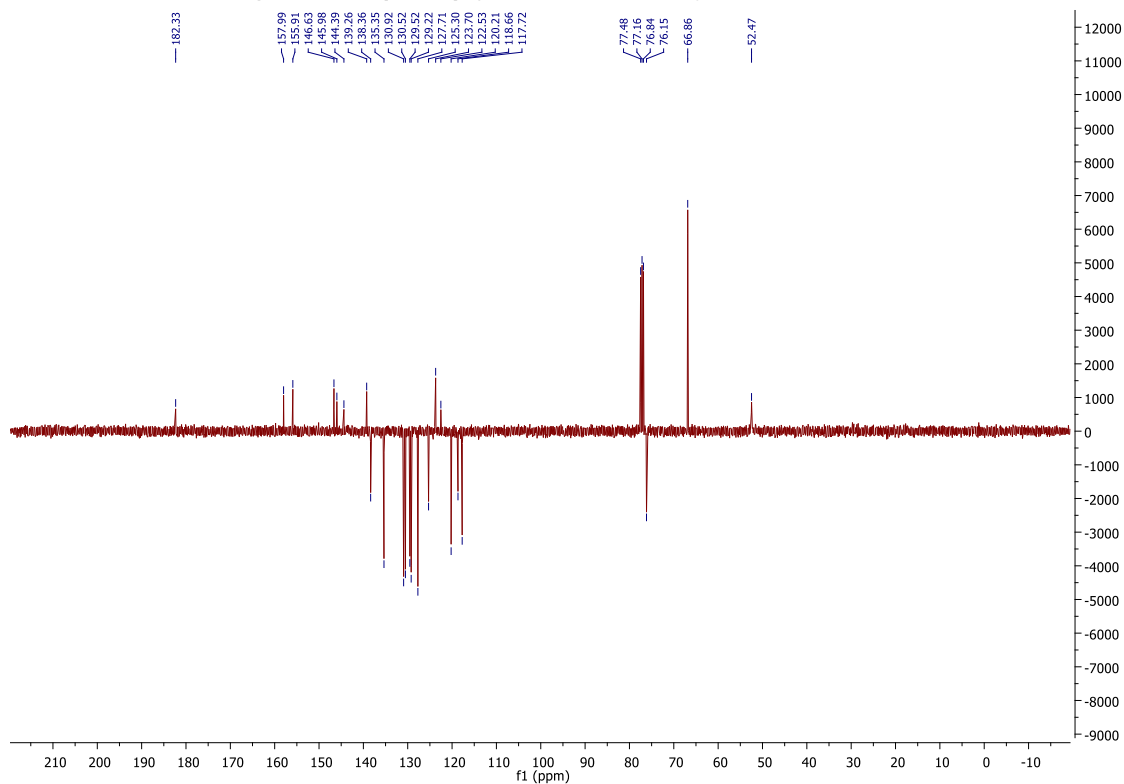

$^1\text{H}$  NMR Spectra of (**5aca**) (400 MHz,  $\text{CDCl}_3$ ):

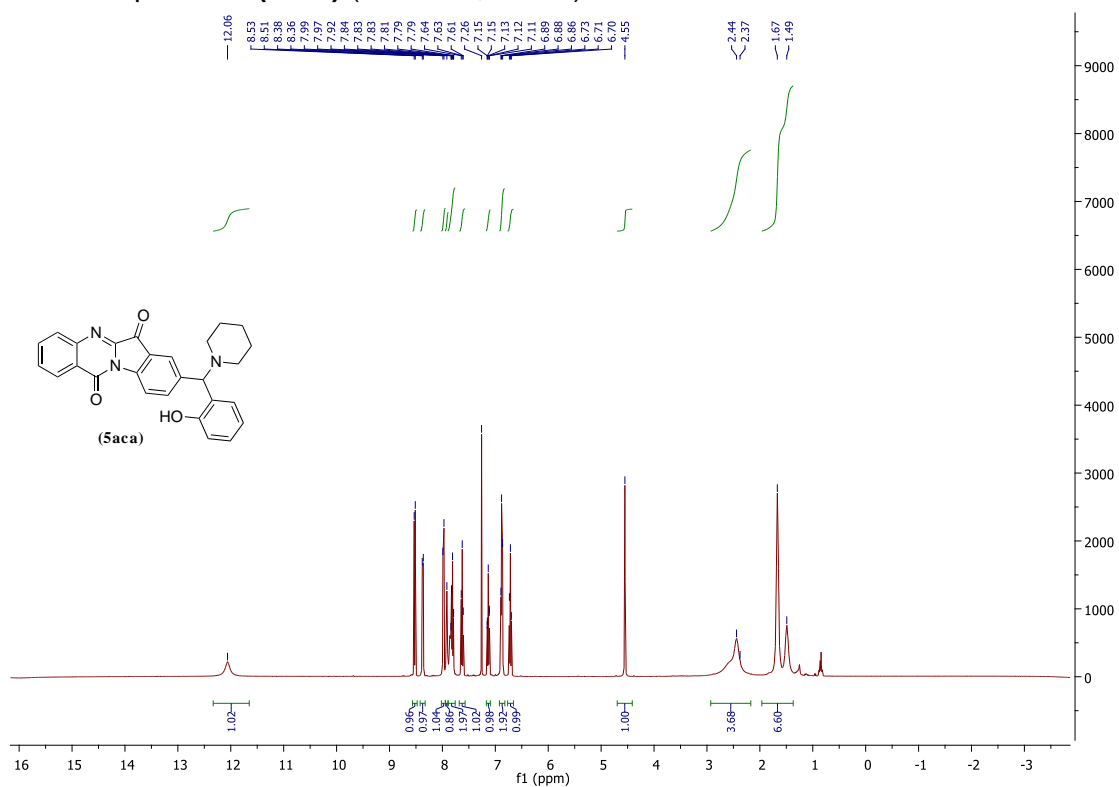

$^{13}\text{C}\{^1\text{H}\}$  NMR spectra of (**5aca**) ( $\text{CDCl}_3$ , 100 MHz):

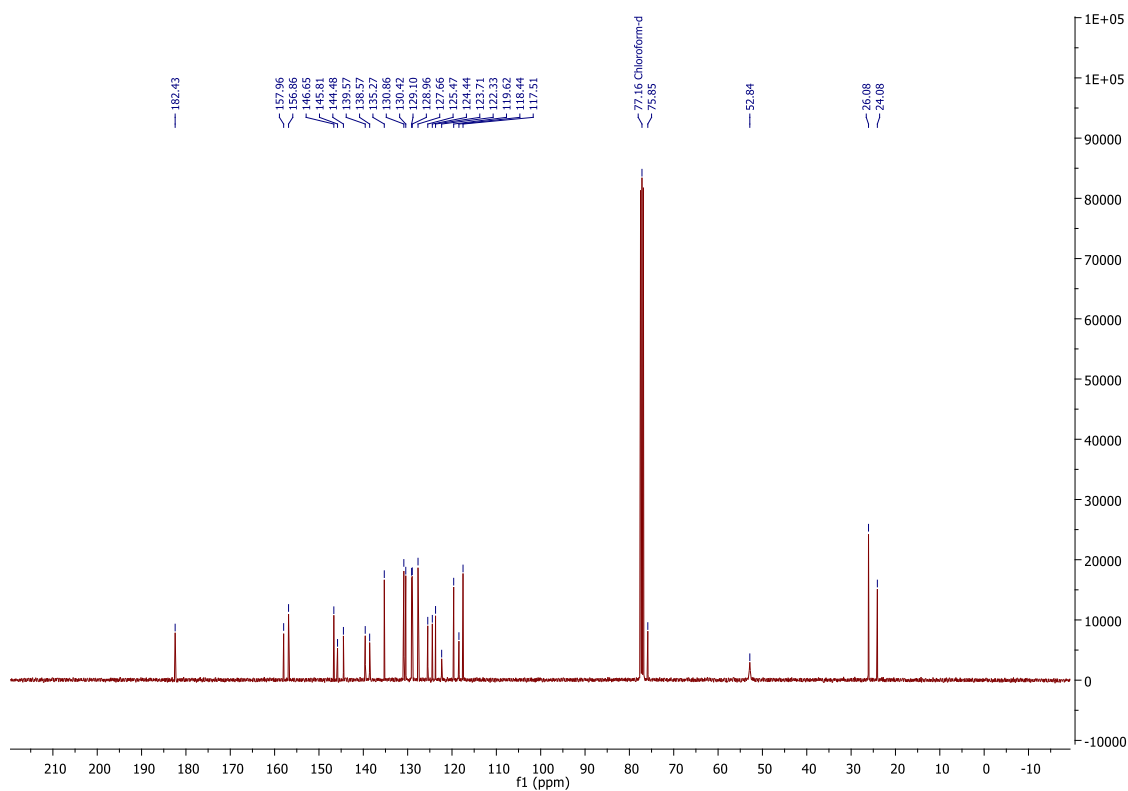

<sup>1</sup>H NMR Spectra of (**5ada**) (400 MHz, CDCl<sub>3</sub>):

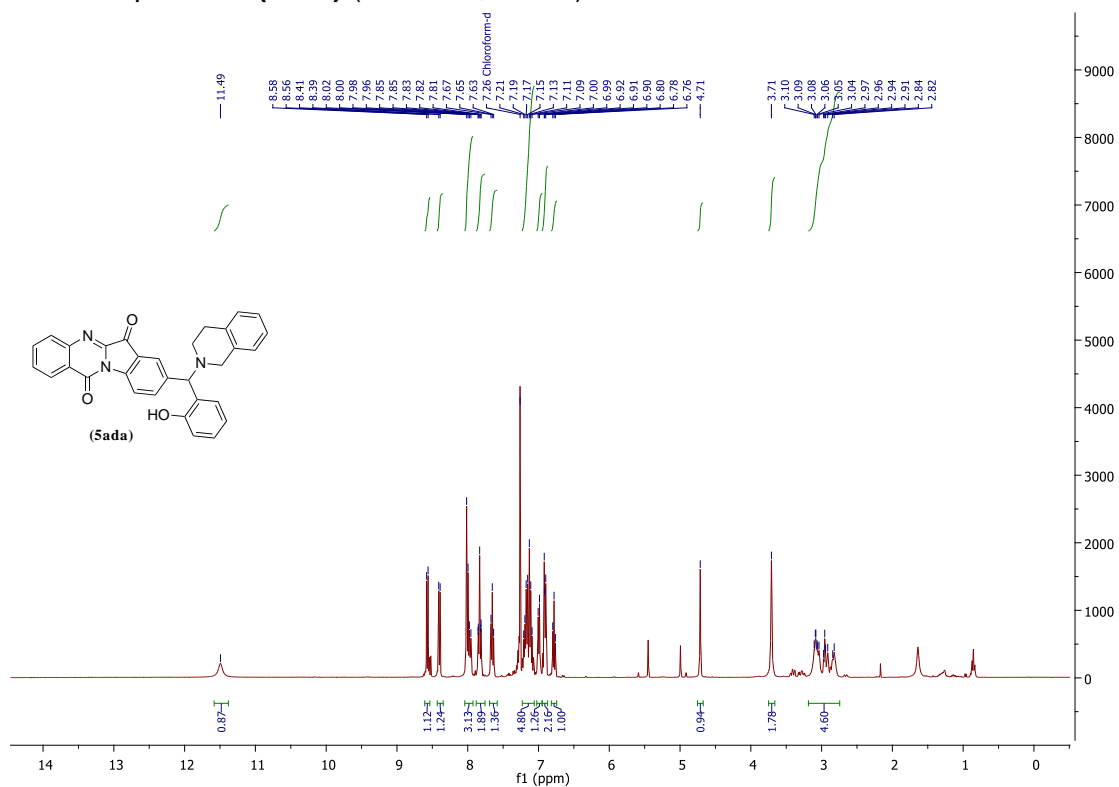

<sup>13</sup>C{<sup>1</sup>H} NMR spectra of (**5ada**) (CDCl<sub>3</sub>, 100 MHz):

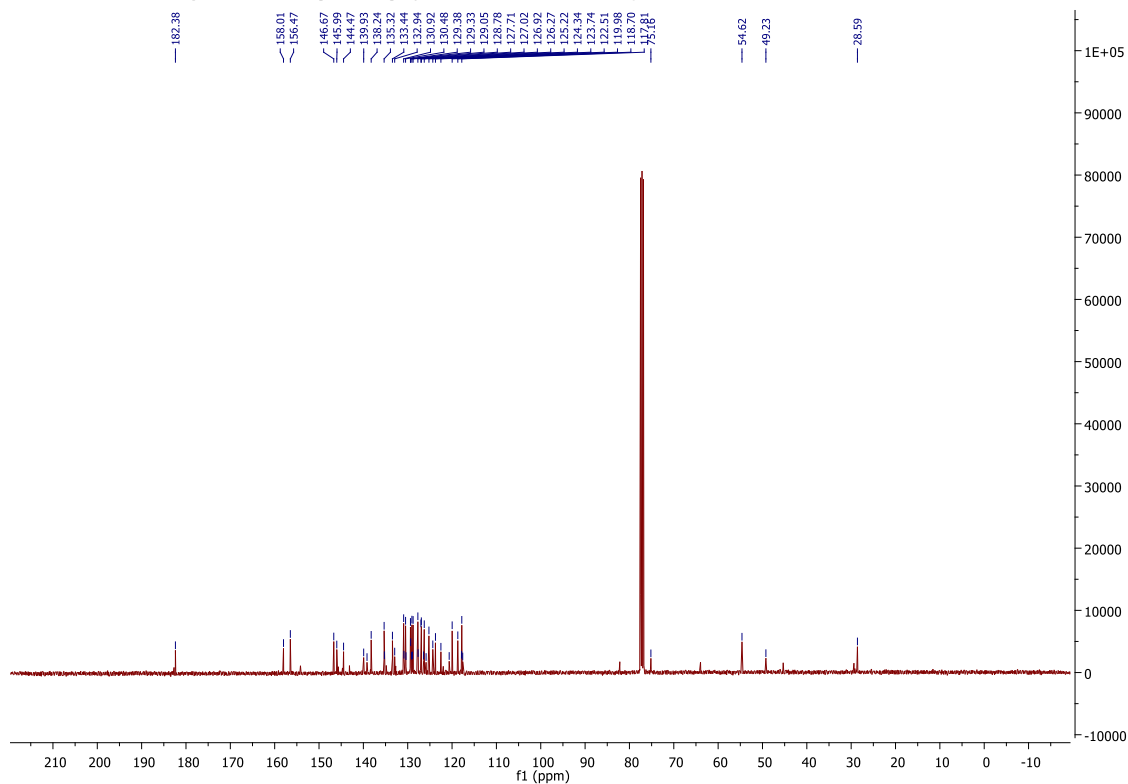



$^1\text{H}$  NMR Spectra of (**5aac**) (400 MHz,  $\text{CDCl}_3$ ):

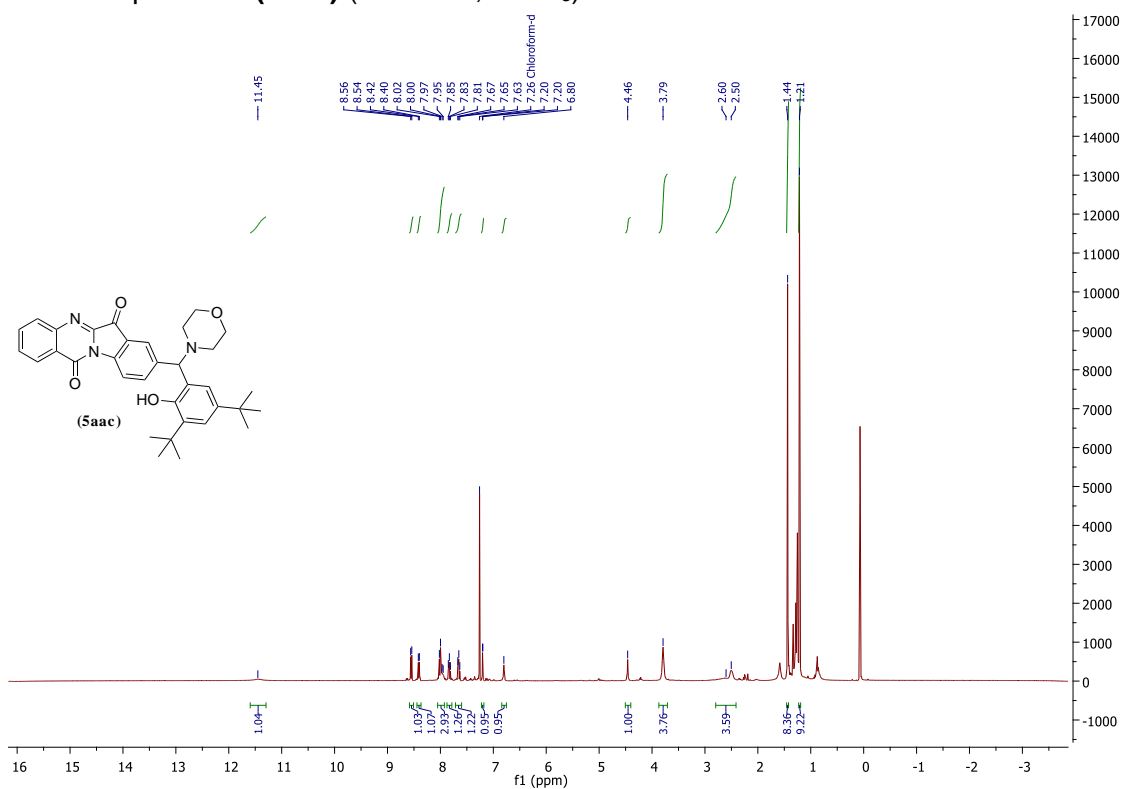

$^{13}\text{C}\{^1\text{H}\}$  NMR spectra of (**5aac**) ( $\text{CDCl}_3$ , 100 MHz):

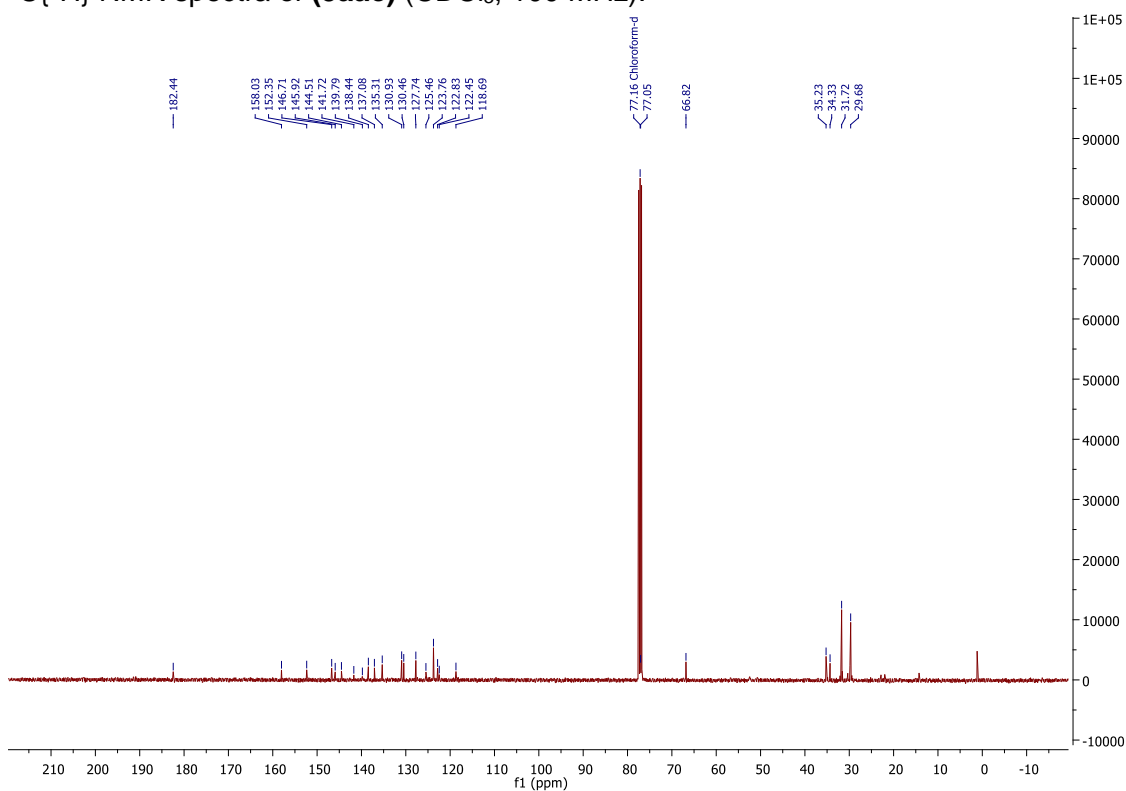

$^1\text{H}$  NMR Spectra of **(5aad)** (400 MHz,  $\text{CDCl}_3$ ):

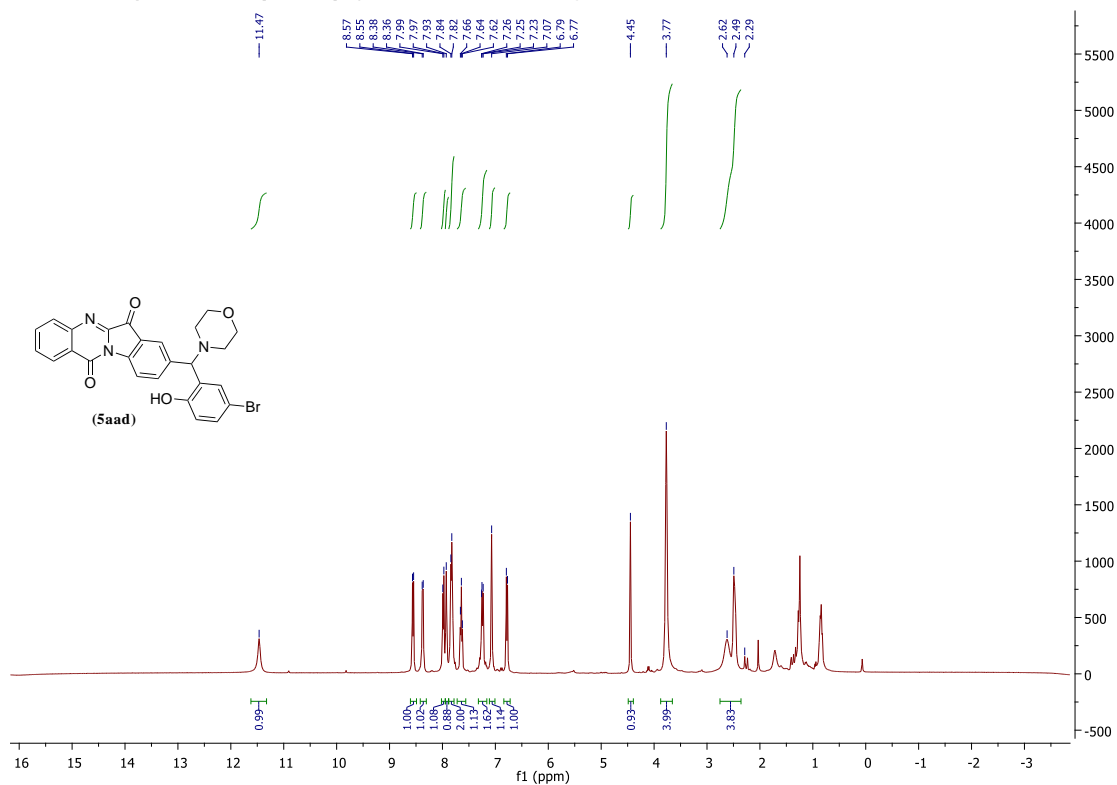

$^{13}\text{C}\{^1\text{H}\}$  NMR spectra of **(5aad)** ( $\text{CDCl}_3$ , 100 MHz):

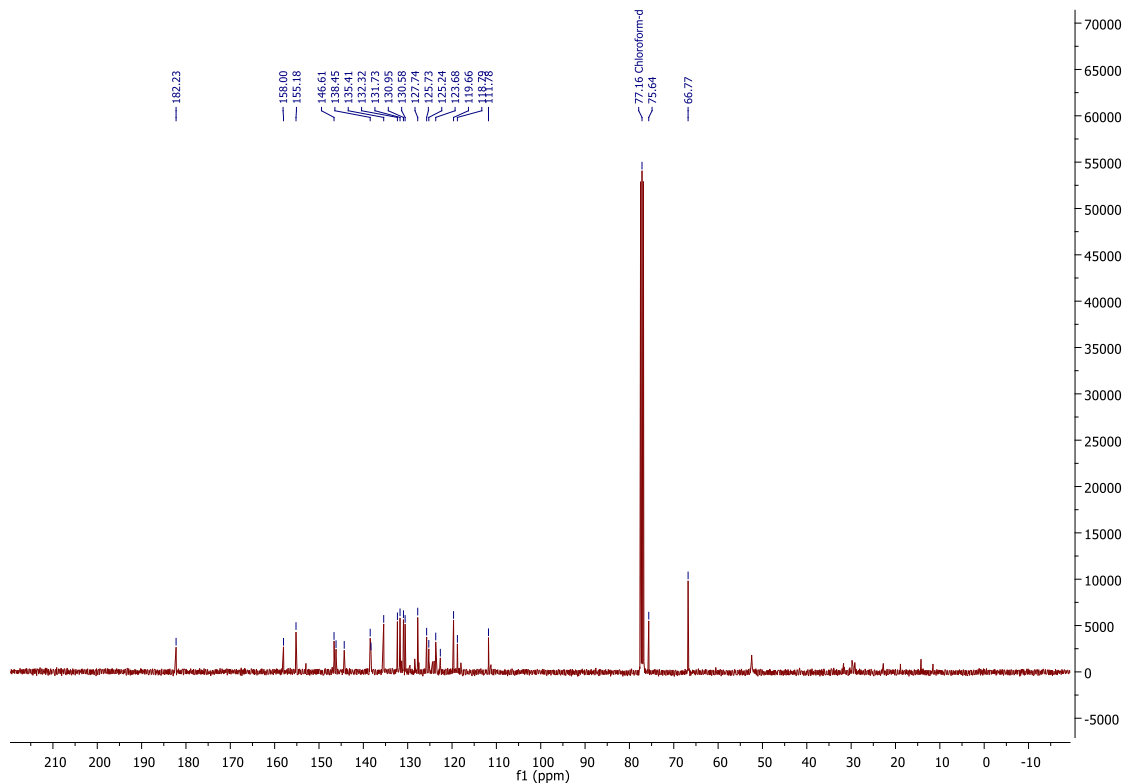

$^1\text{H}$  NMR Spectra of (**5aaf**) (400 MHz,  $\text{CDCl}_3$ ):

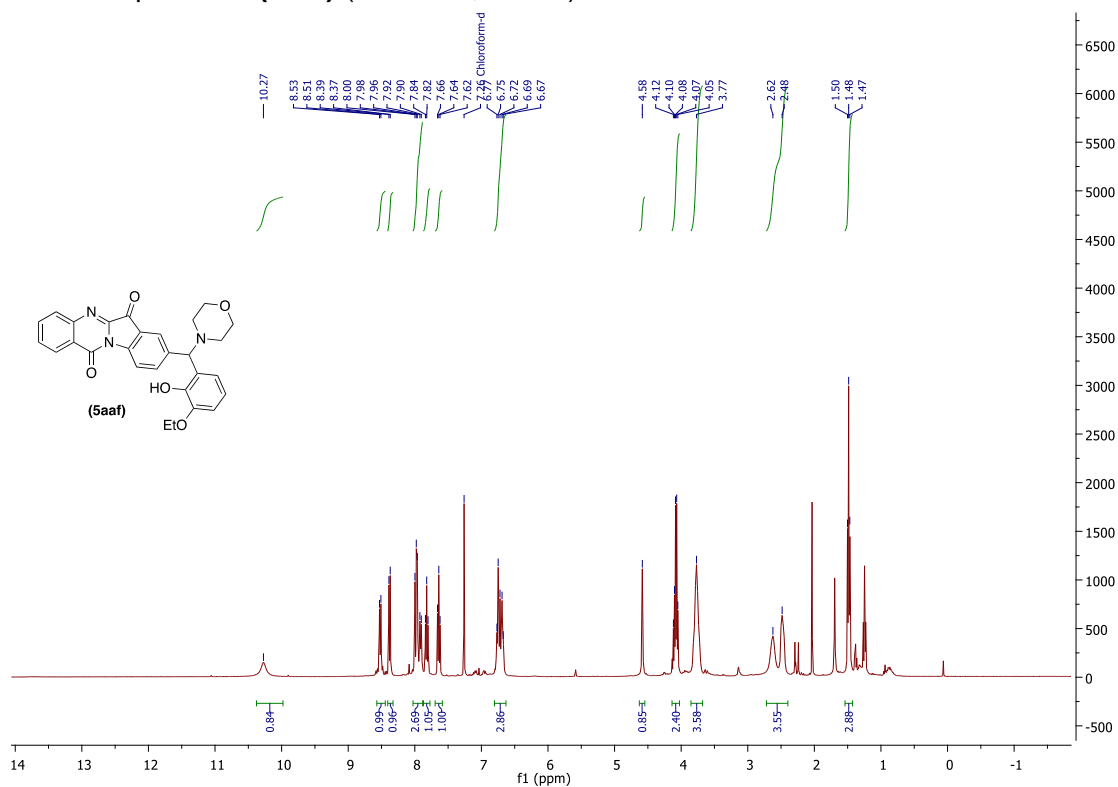

$^{13}\text{C}\{^1\text{H}\}$  NMR spectra of (**5aaf**) ( $\text{CDCl}_3$ , 100 MHz):

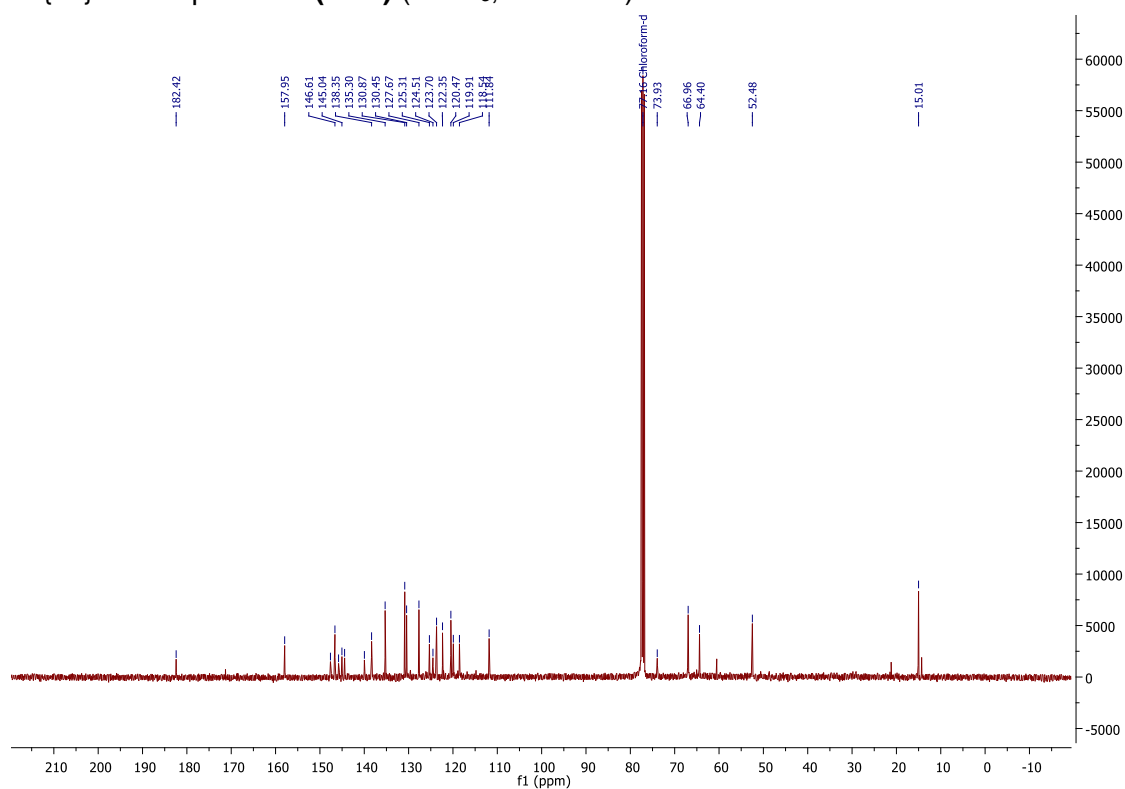

<sup>1</sup>H NMR Spectra of (**5aag**) (400 MHz, CDCl<sub>3</sub>):

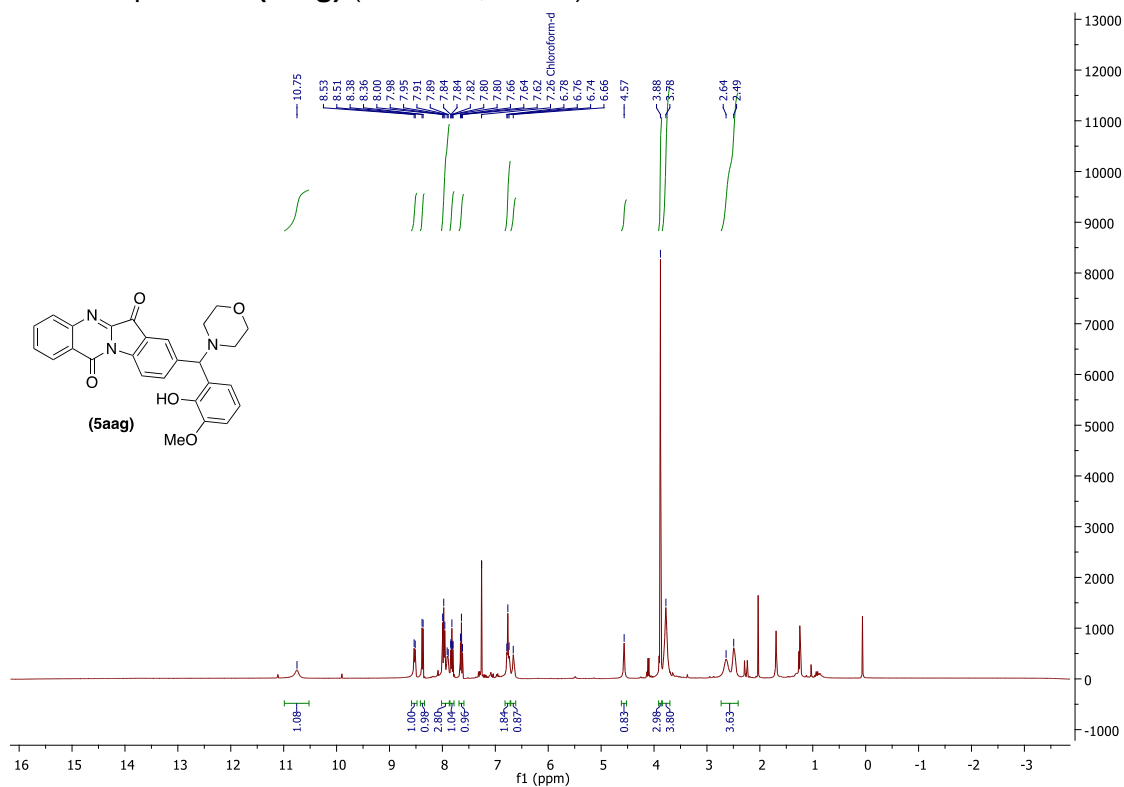

<sup>13</sup>C{<sup>1</sup>H} NMR spectra of (**5aag**) (CDCl<sub>3</sub>, 100 MHz):

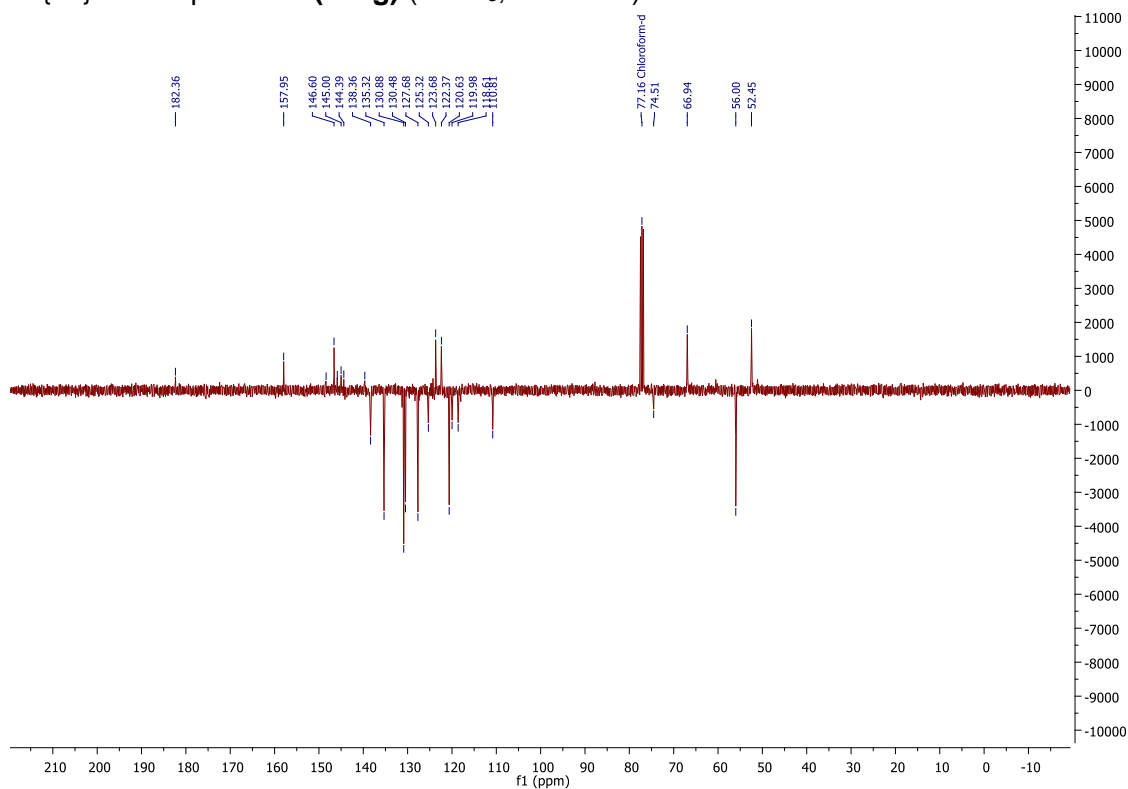

<sup>1</sup>H NMR Spectra of (5aai) (400 MHz, CDCl<sub>3</sub>):

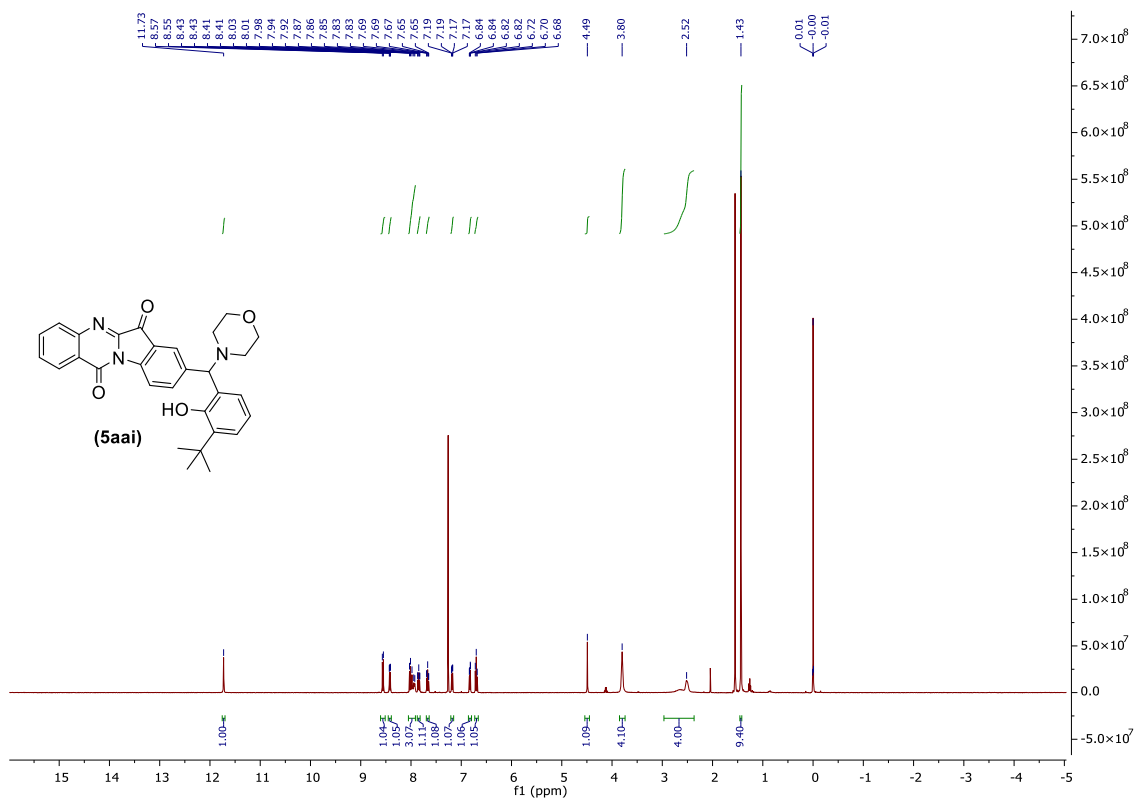

<sup>13</sup>C{<sup>1</sup>H} NMR spectra of (5aai) (CDCl<sub>3</sub>, 100 MHz):

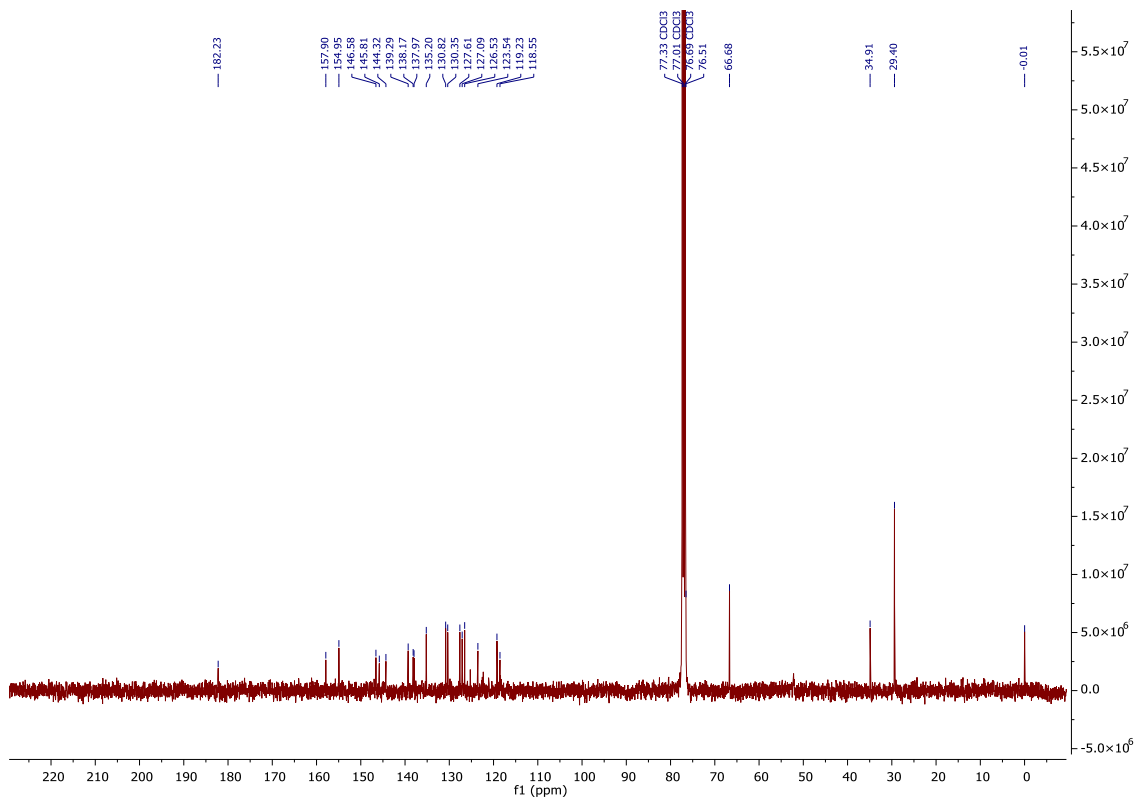

DEPT-135 NMR spectra of **(5aai)** (CDCl<sub>3</sub>, 100 MHz):

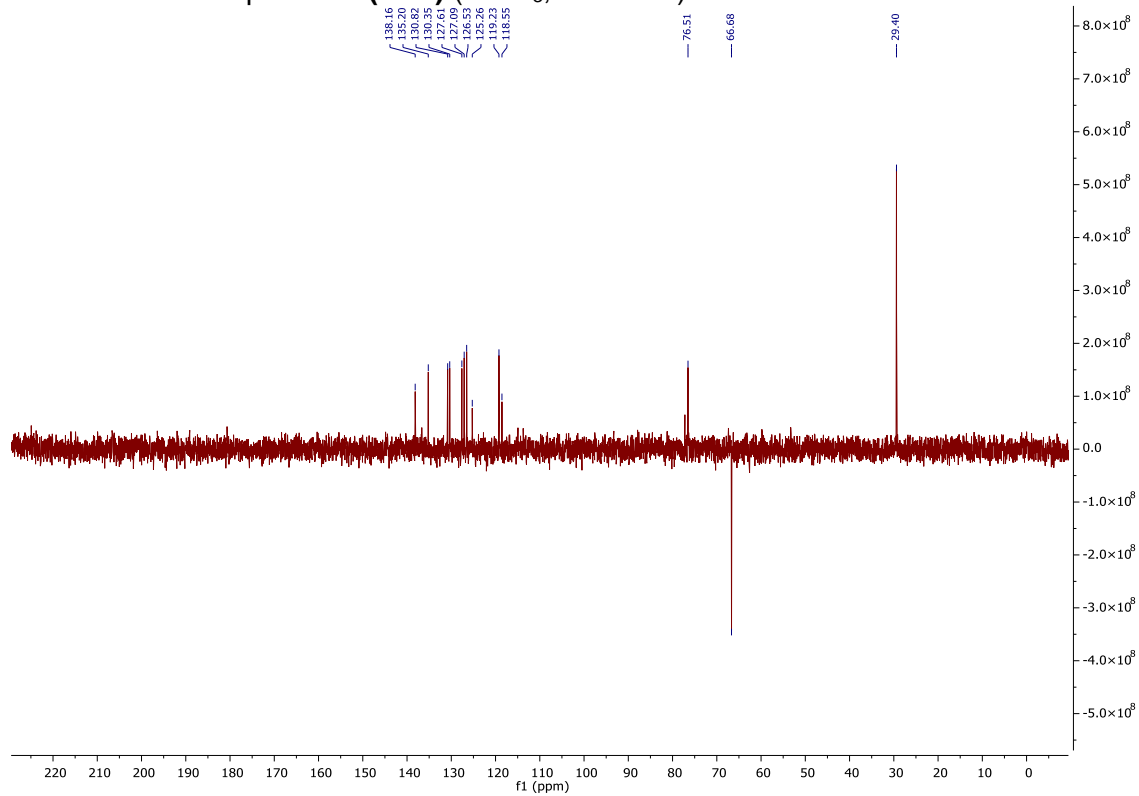

COSY NMR spectra of **(5aai)** (CDCl<sub>3</sub>, 400 MHz):

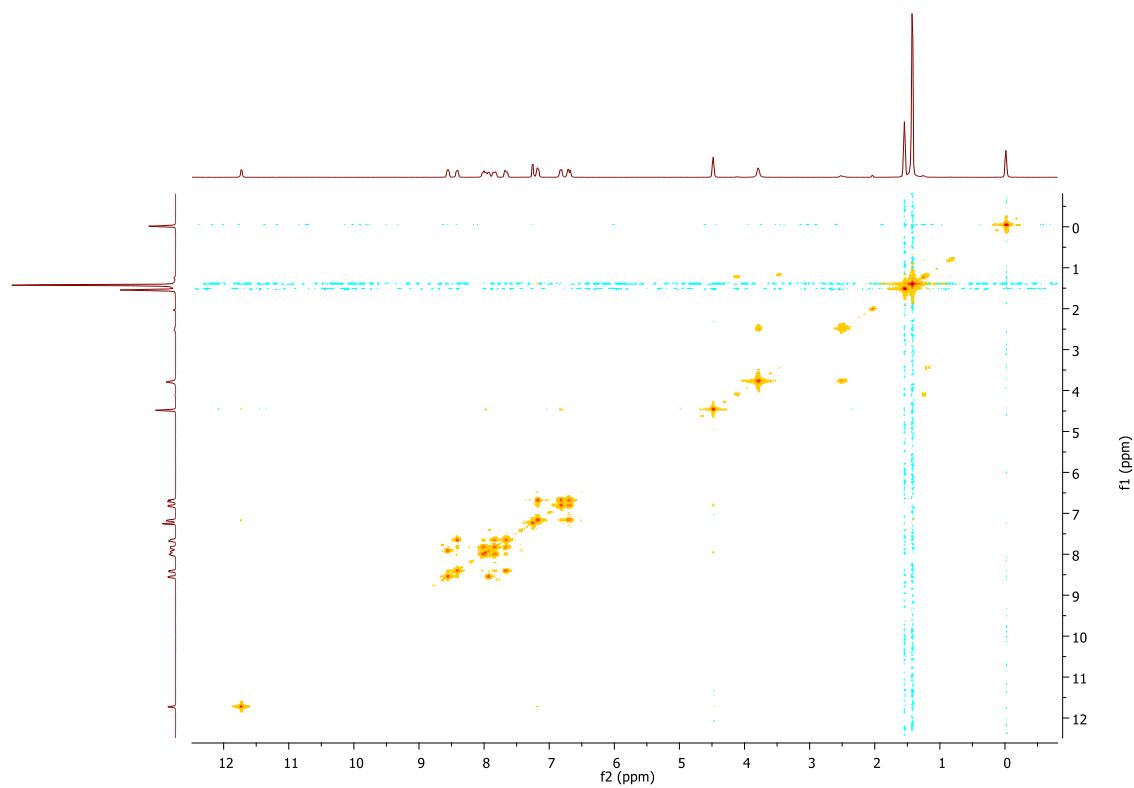

NOESY NMR spectra of **(5aai)** (CDCl<sub>3</sub>, 400 MHz):

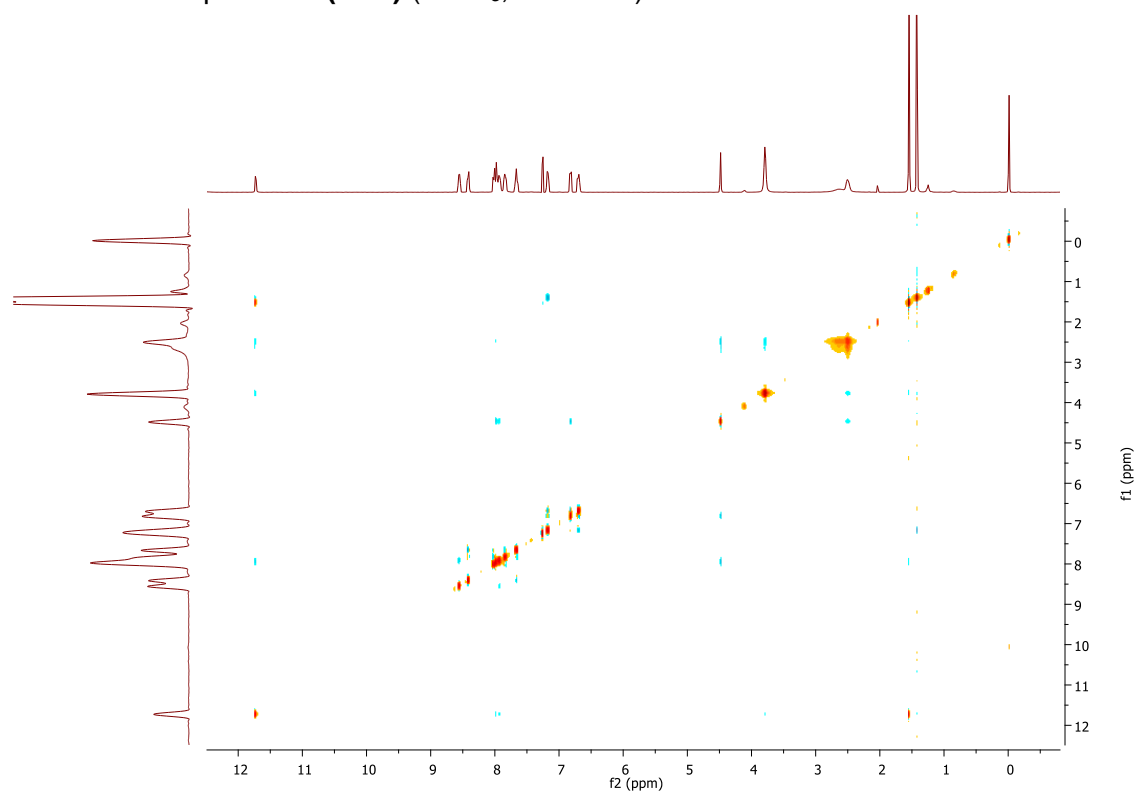

HSQC NMR spectra of **(5aai)** (CDCl<sub>3</sub>):

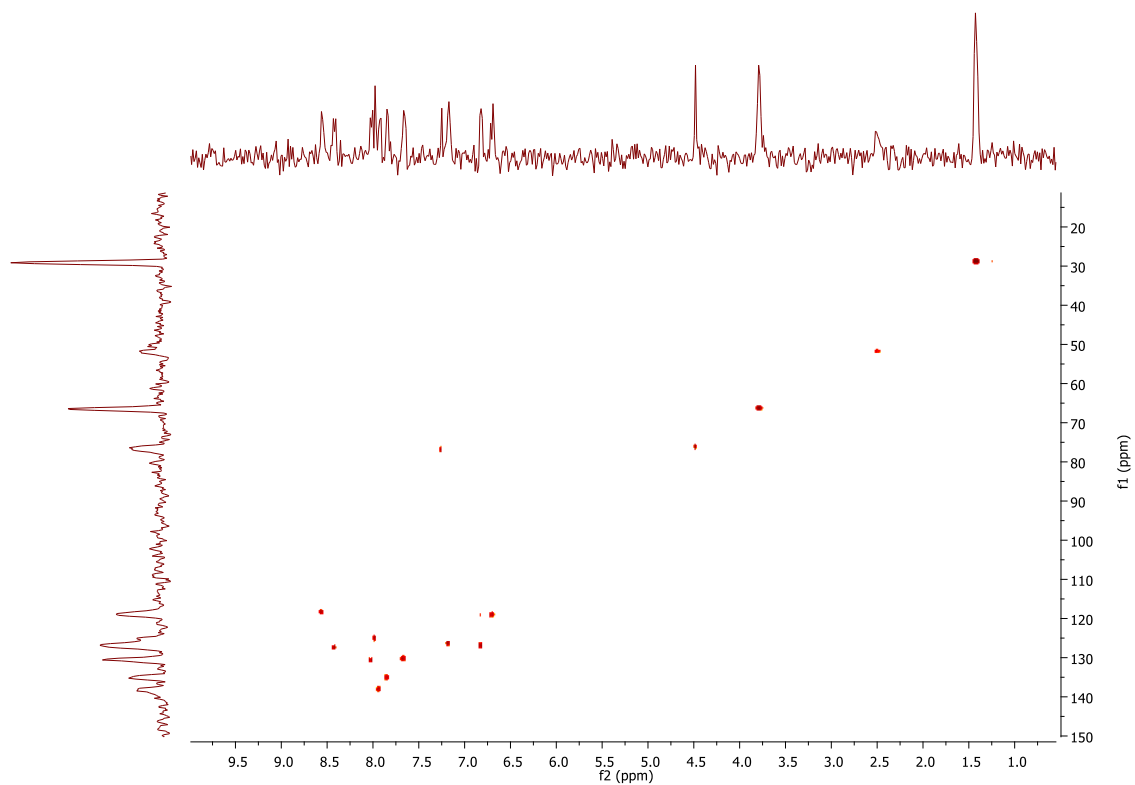

HMBC NMR spectra of **(5aai)** (CDCl<sub>3</sub>):

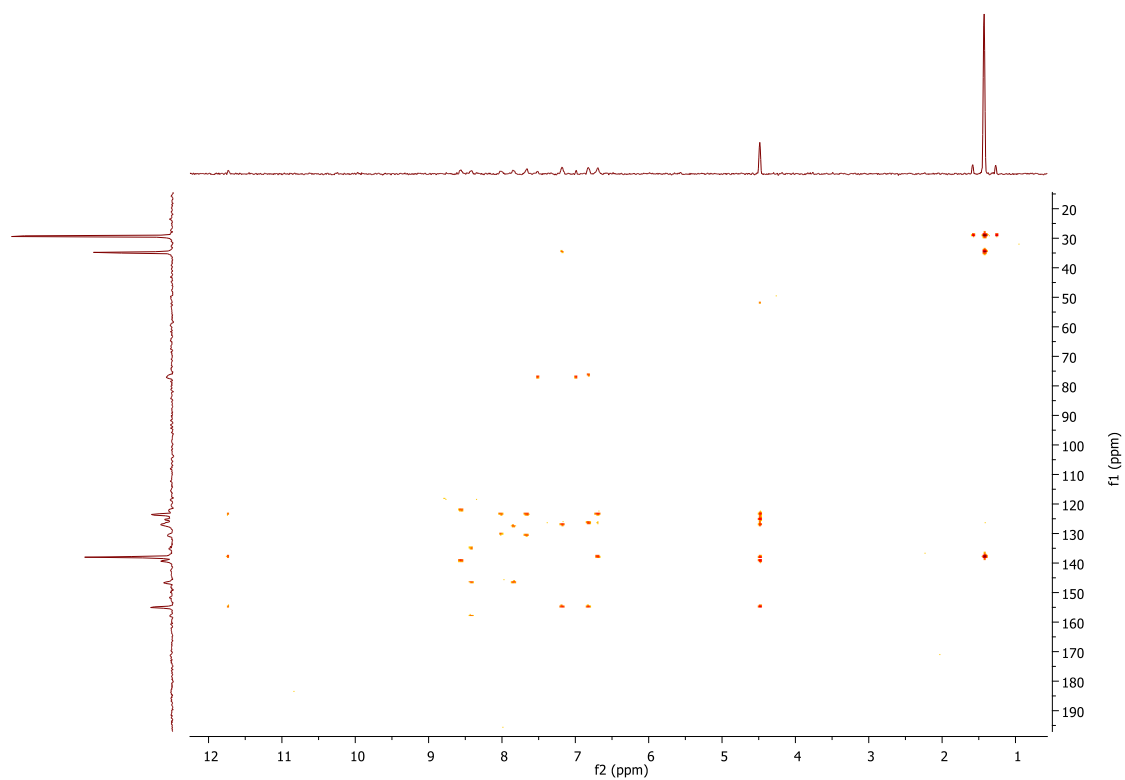



$^1\text{H}$  NMR Spectra of **(5baa)** (400 MHz,  $\text{CDCl}_3$ ):

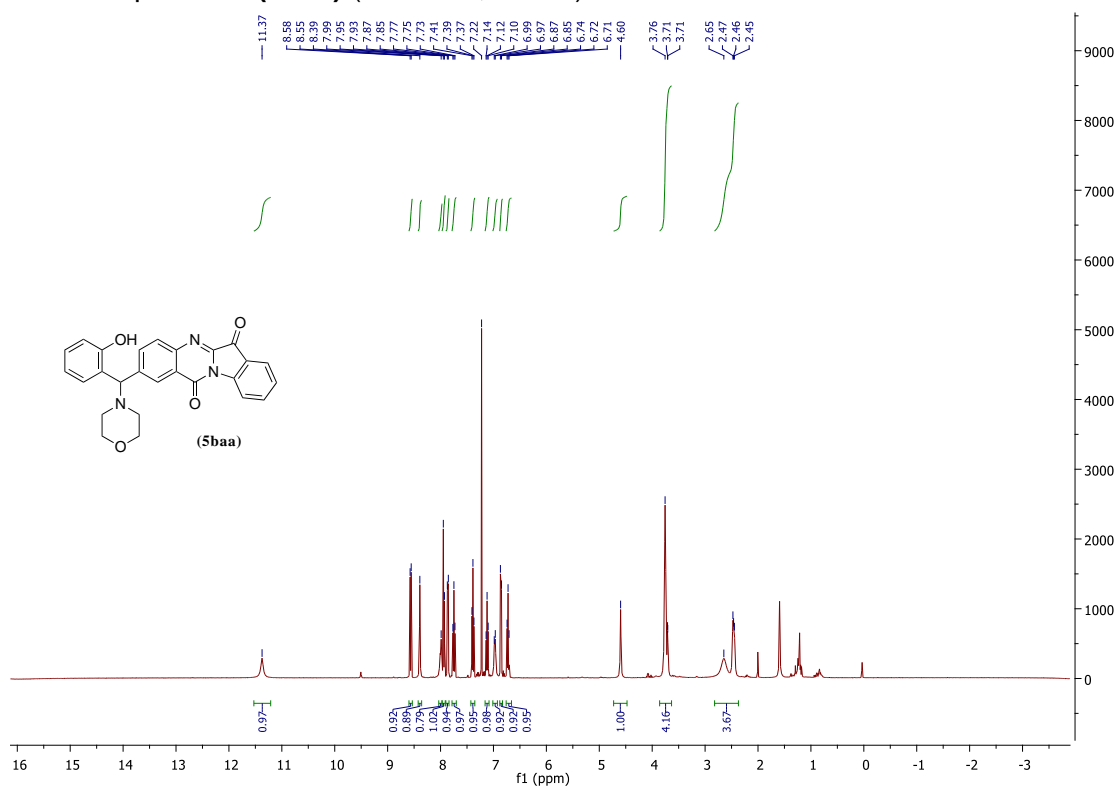

$^{13}\text{C}\{^1\text{H}\}$  NMR spectra of **(5baa)** ( $\text{CDCl}_3$ , 100 MHz):

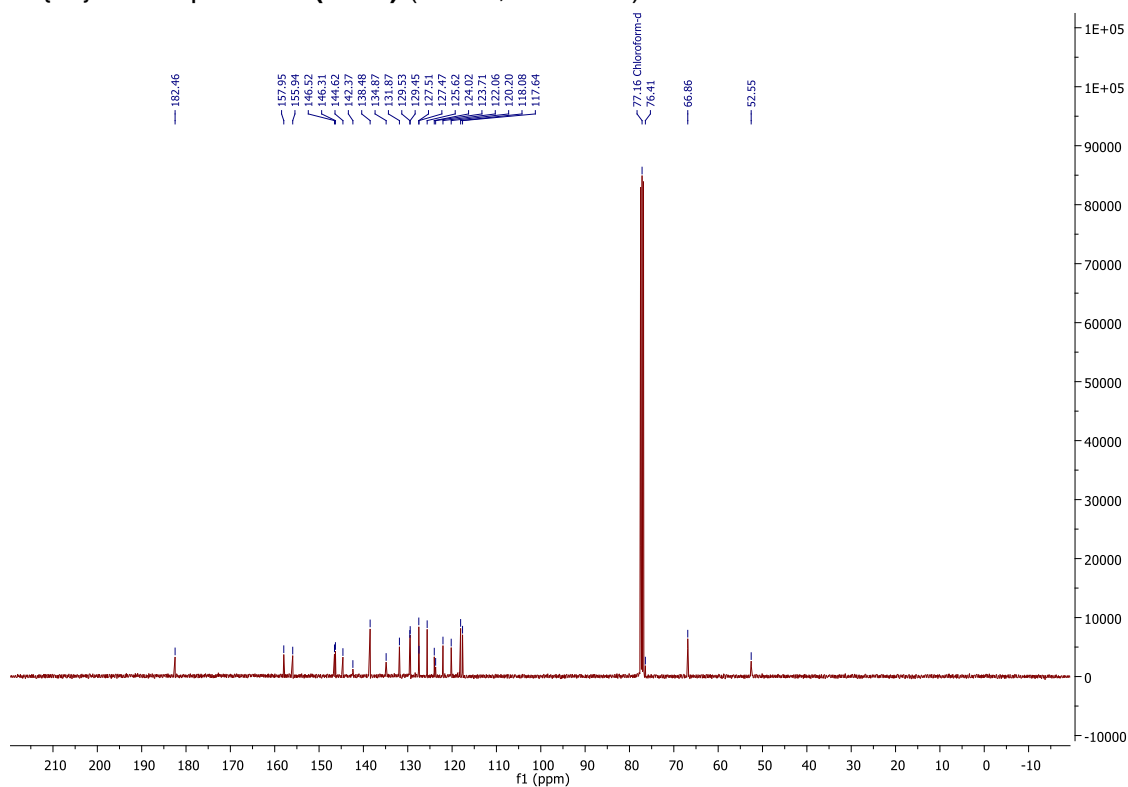

$^1\text{H}$  NMR Spectra of **(5bca)** (400 MHz,  $\text{CDCl}_3$ ):

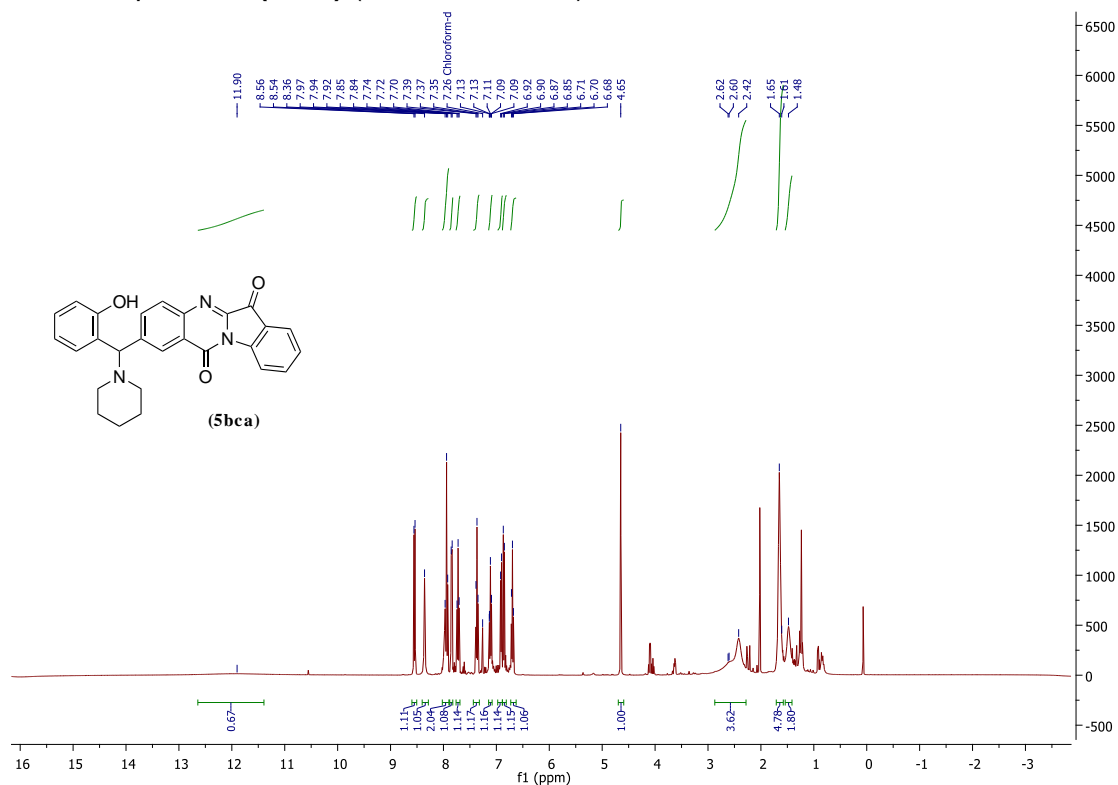

$^{13}\text{C}\{^1\text{H}\}$  NMR spectra of **(5bca)** ( $\text{CDCl}_3$ , 100 MHz):

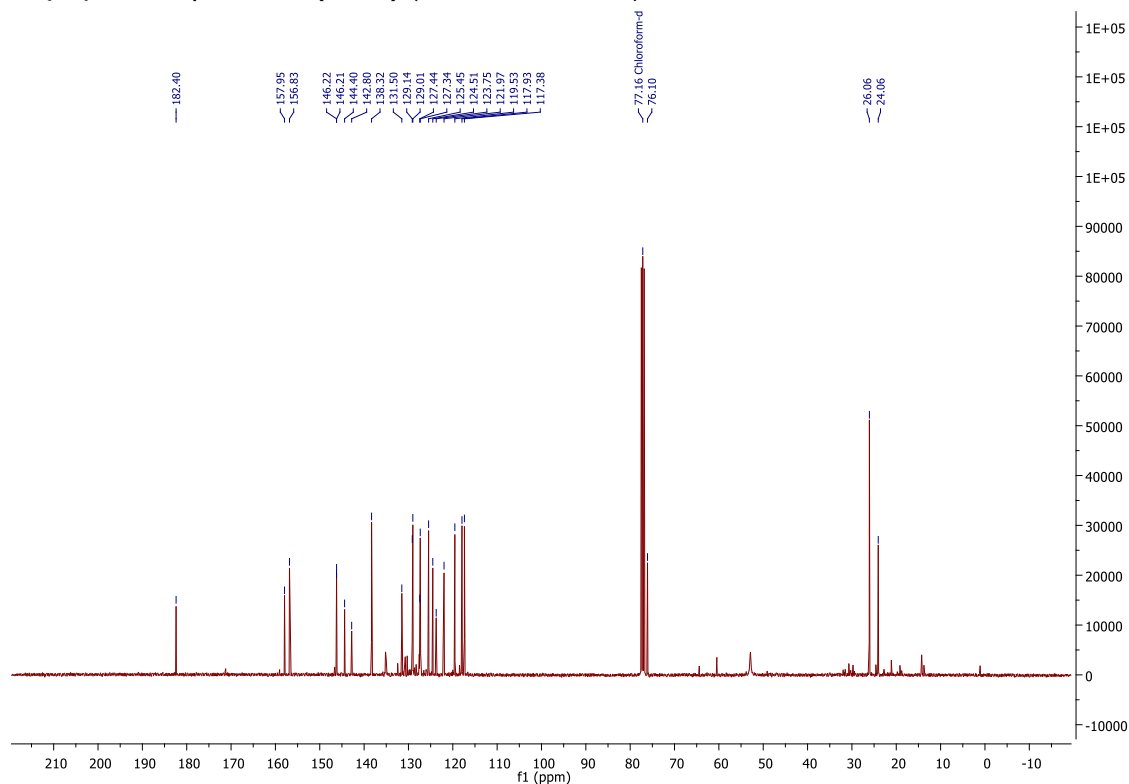

$^1\text{H}$  NMR Spectra of **(5bea)** (400 MHz,  $\text{CDCl}_3$ ):

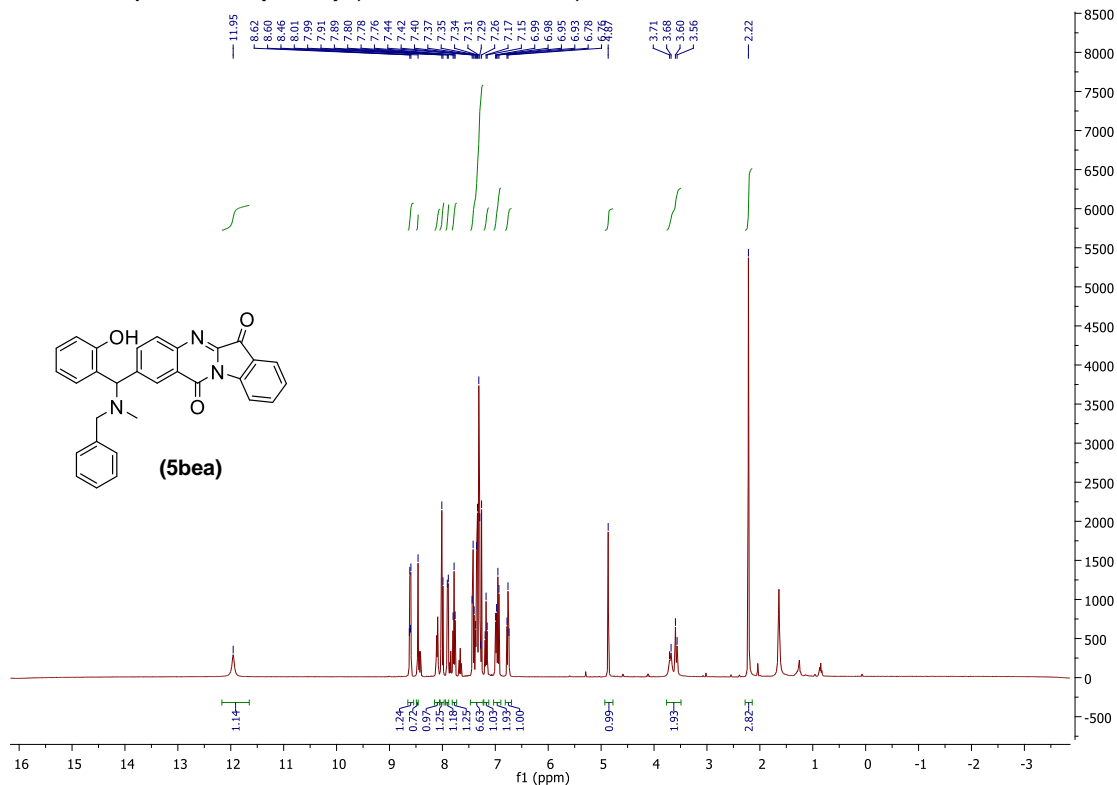

$^{13}\text{C}\{^1\text{H}\}$  NMR spectra of **(5bea)** ( $\text{CDCl}_3$ , 100 MHz):

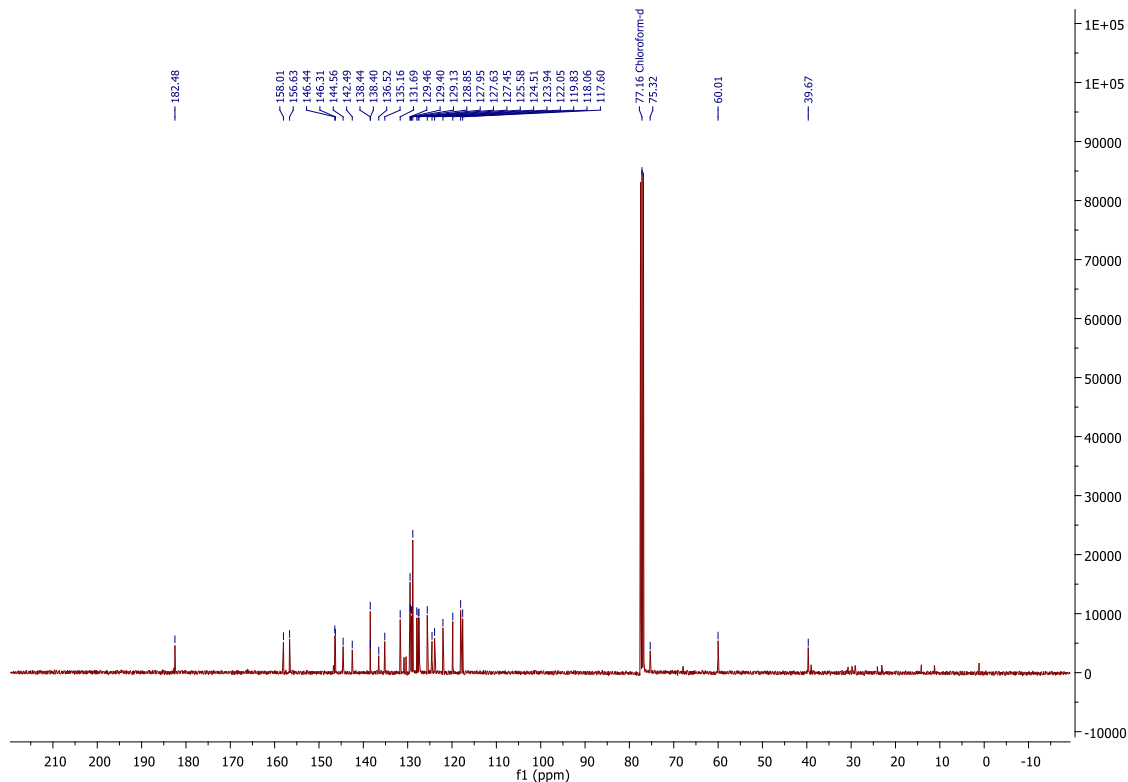

$^1\text{H}$  NMR Spectra of **(5bac)** (400 MHz,  $\text{CDCl}_3$ ):

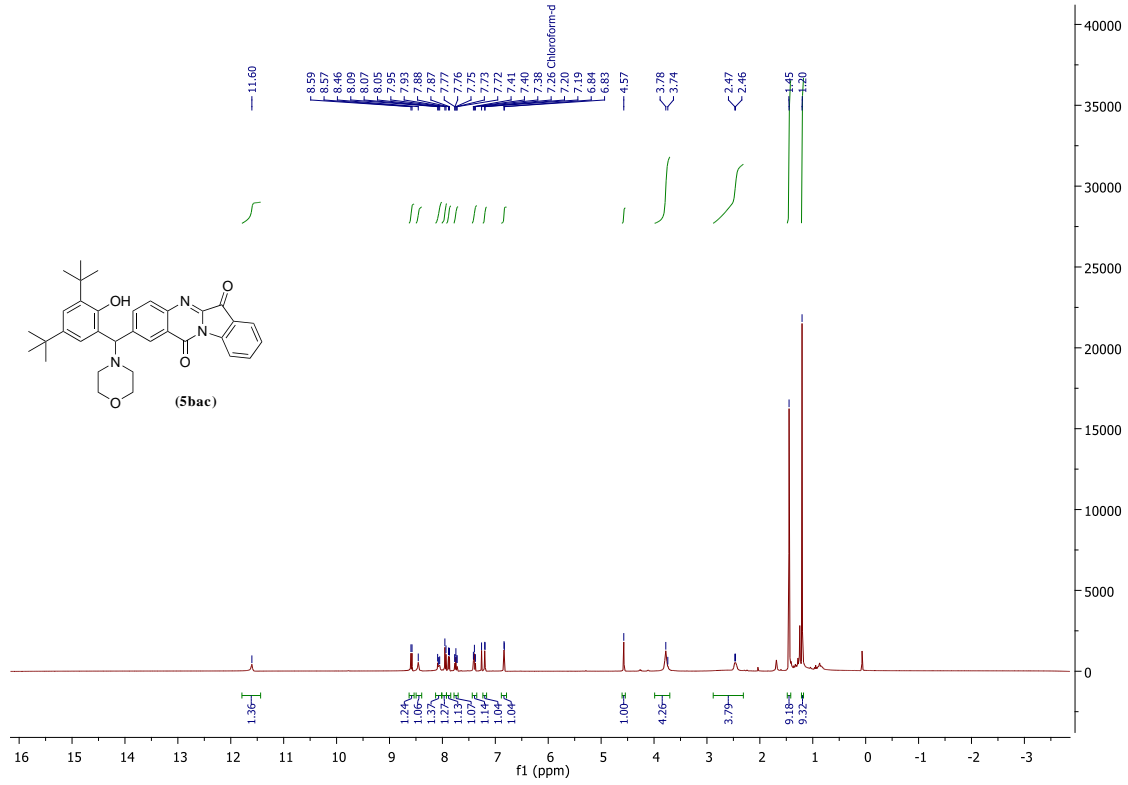

$^{13}\text{C}\{^1\text{H}\}$  NMR spectra of **(5bac)** ( $\text{CDCl}_3$ , 100 MHz):

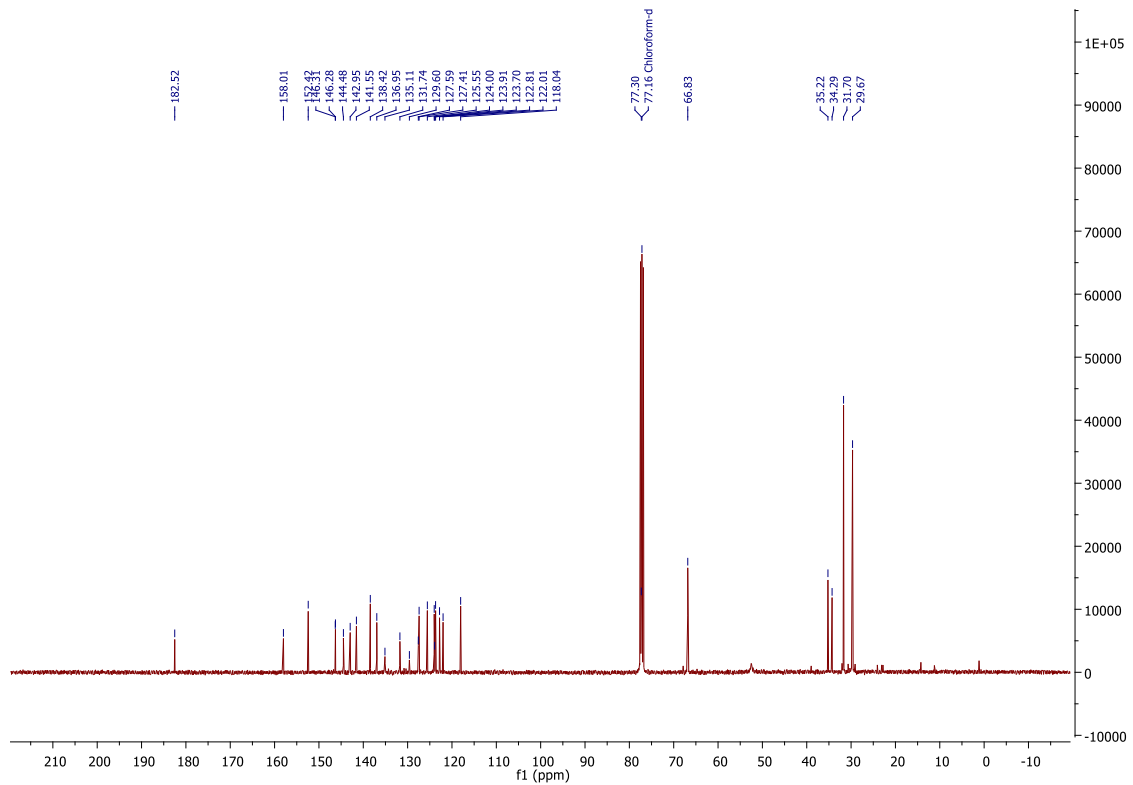

<sup>1</sup>H NMR Spectra of (**5bad**) (400 MHz, CDCl<sub>3</sub>):

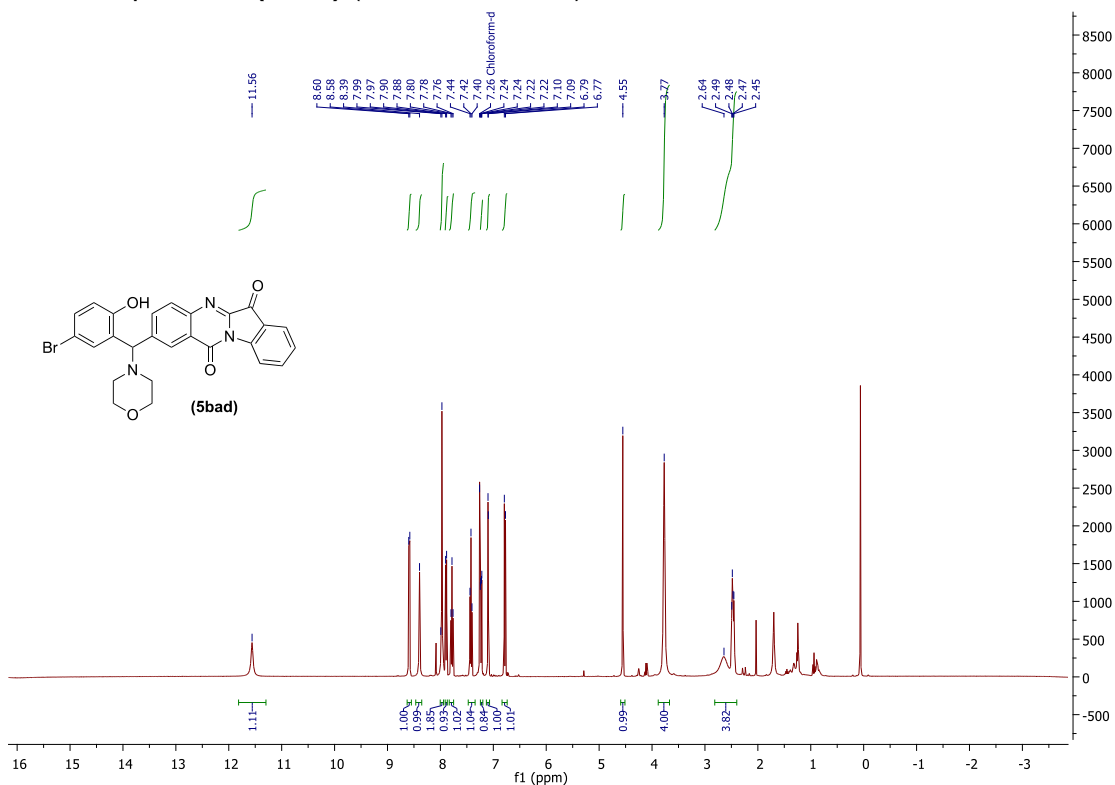

<sup>13</sup>C{<sup>1</sup>H} NMR spectra of (**5bad**) (CDCl<sub>3</sub>, 100 MHz):

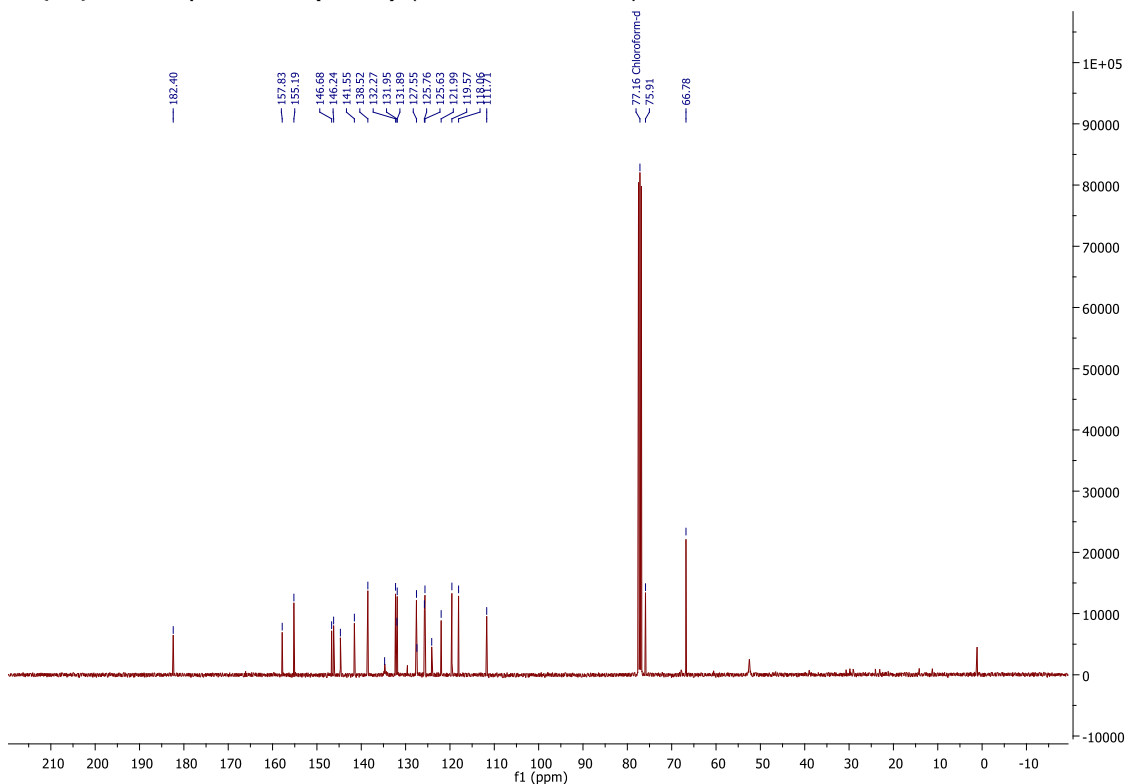

$^1\text{H}$  NMR Spectra of **(5baf)** (400 MHz,  $\text{CDCl}_3$ ):

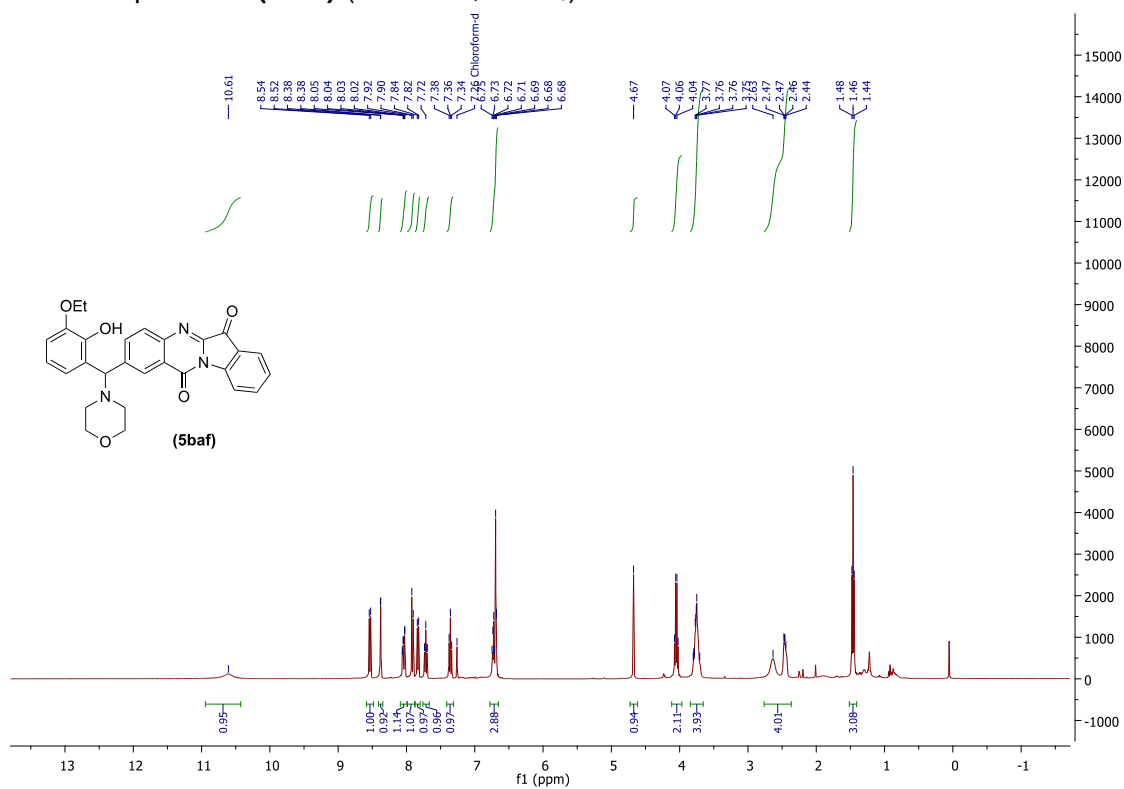

$^{13}\text{C}\{^1\text{H}\}$  NMR spectra of **(5baf)** ( $\text{CDCl}_3$ , 100 MHz):

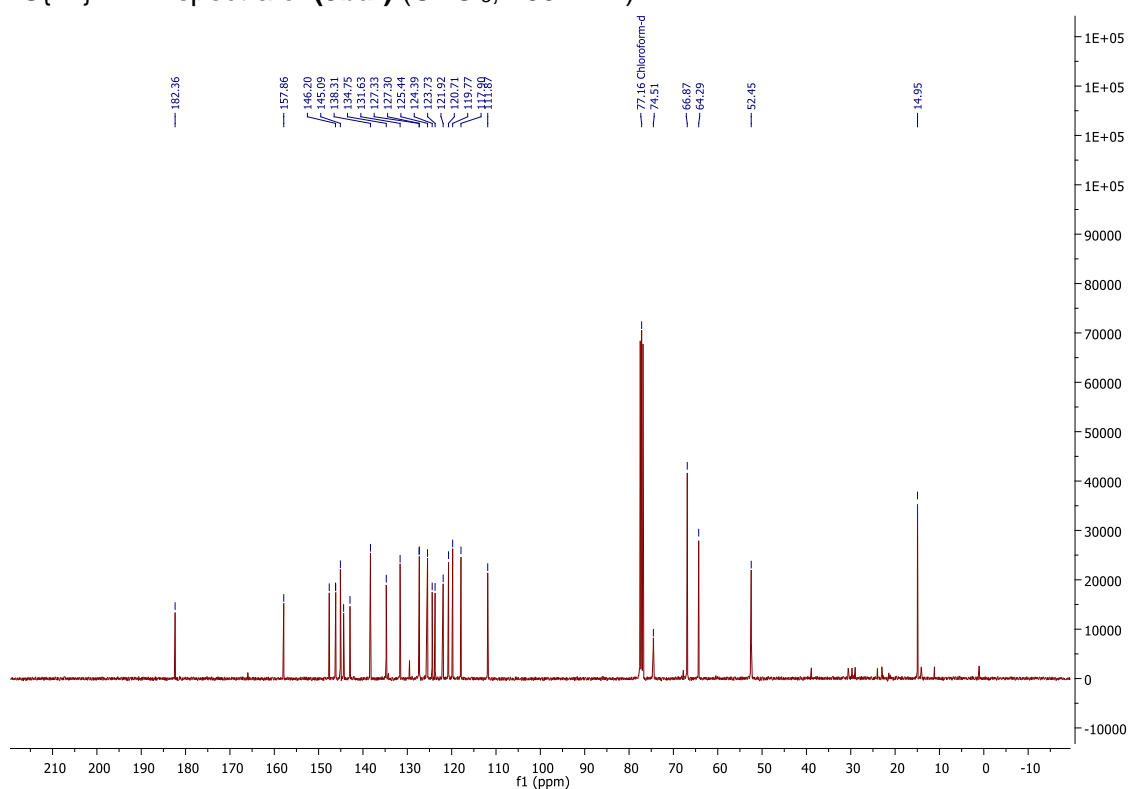

$^1\text{H}$  NMR Spectra of **(5bag)** (400 MHz,  $\text{CDCl}_3$ ):

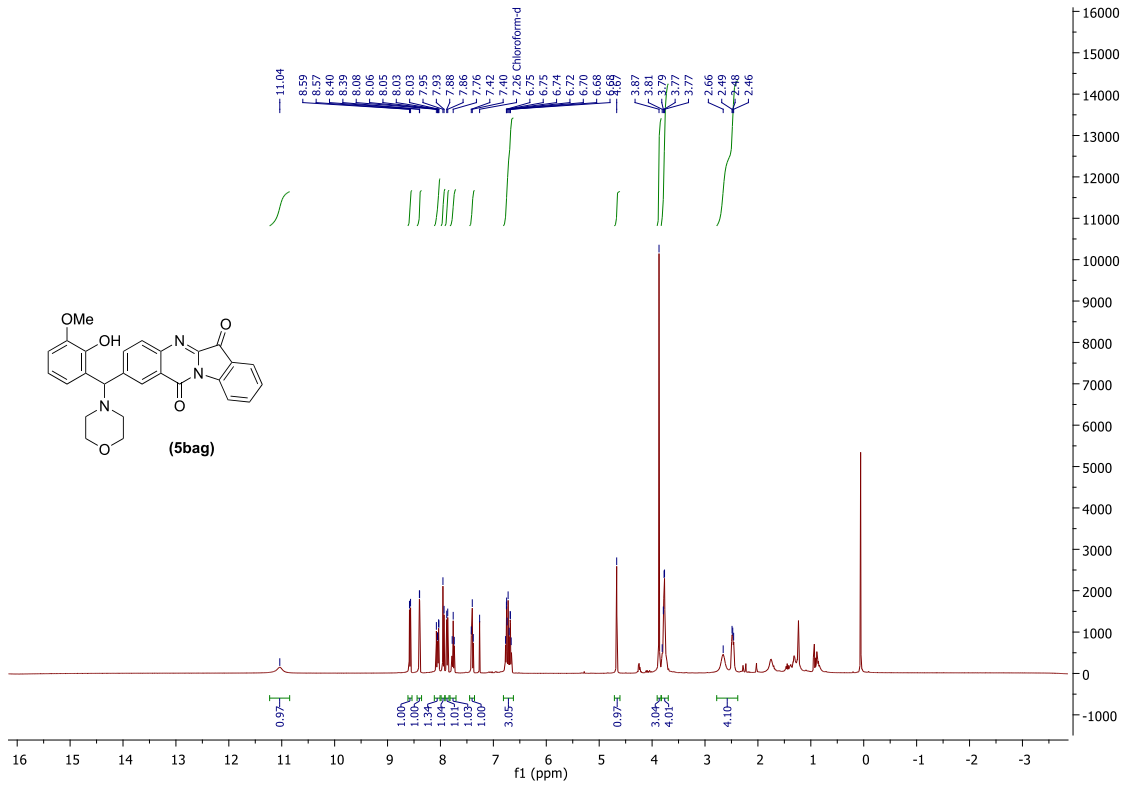

$^{13}\text{C}\{^1\text{H}\}$  NMR spectra of **(5bag)** ( $\text{CDCl}_3$ , 100 MHz):

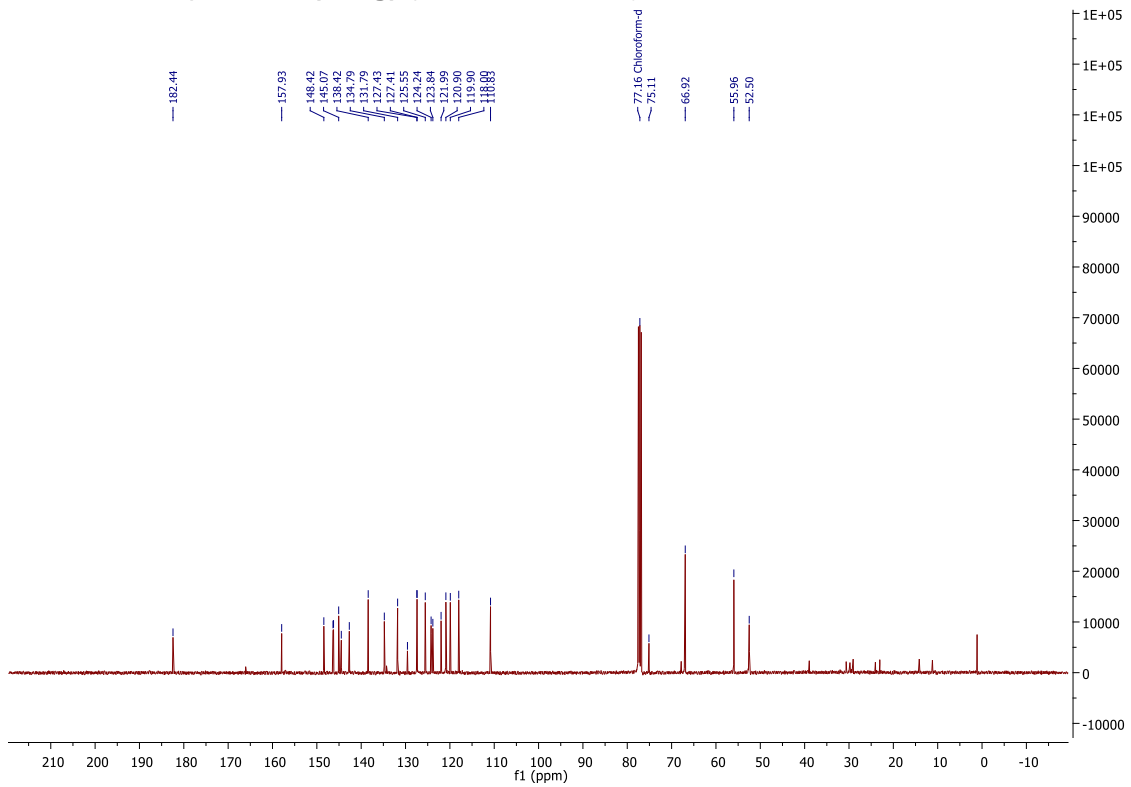

$^1\text{H}$  NMR Spectra of (**5caa**) (400 MHz,  $\text{CDCl}_3$ ):

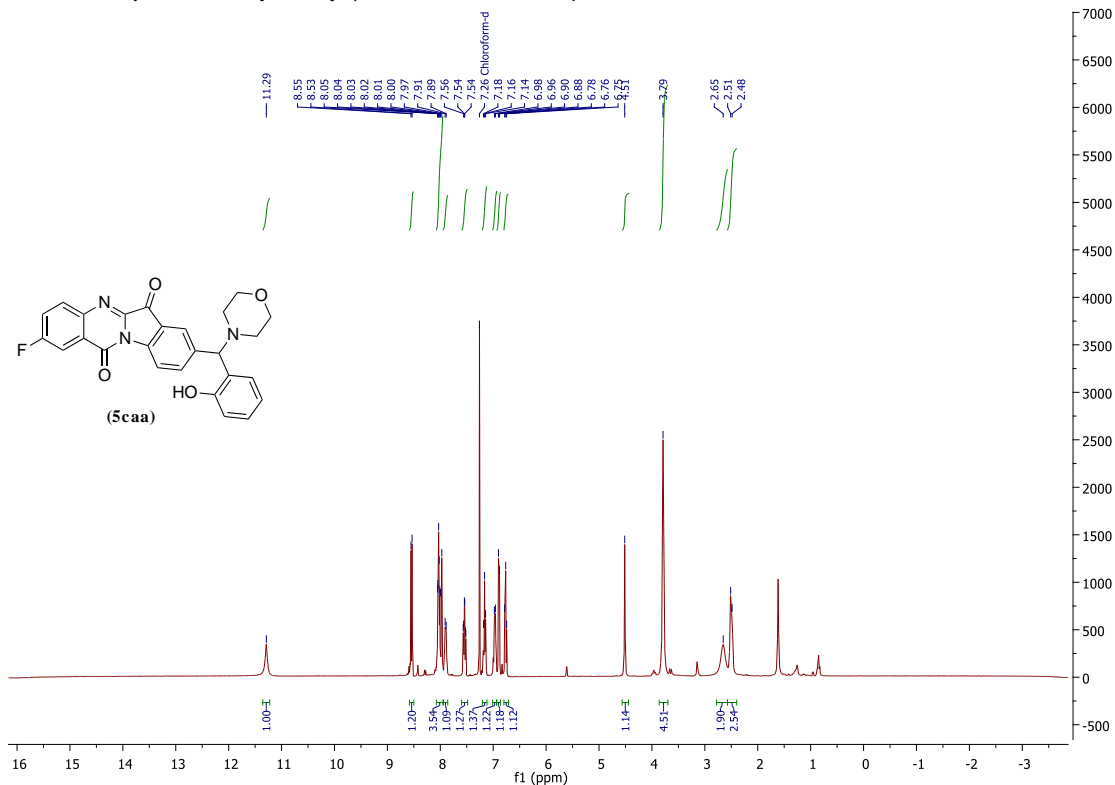

$^{13}\text{C}\{^1\text{H}\}$  NMR spectra of (**5caa**) ( $\text{CDCl}_3$ , 100 MHz):

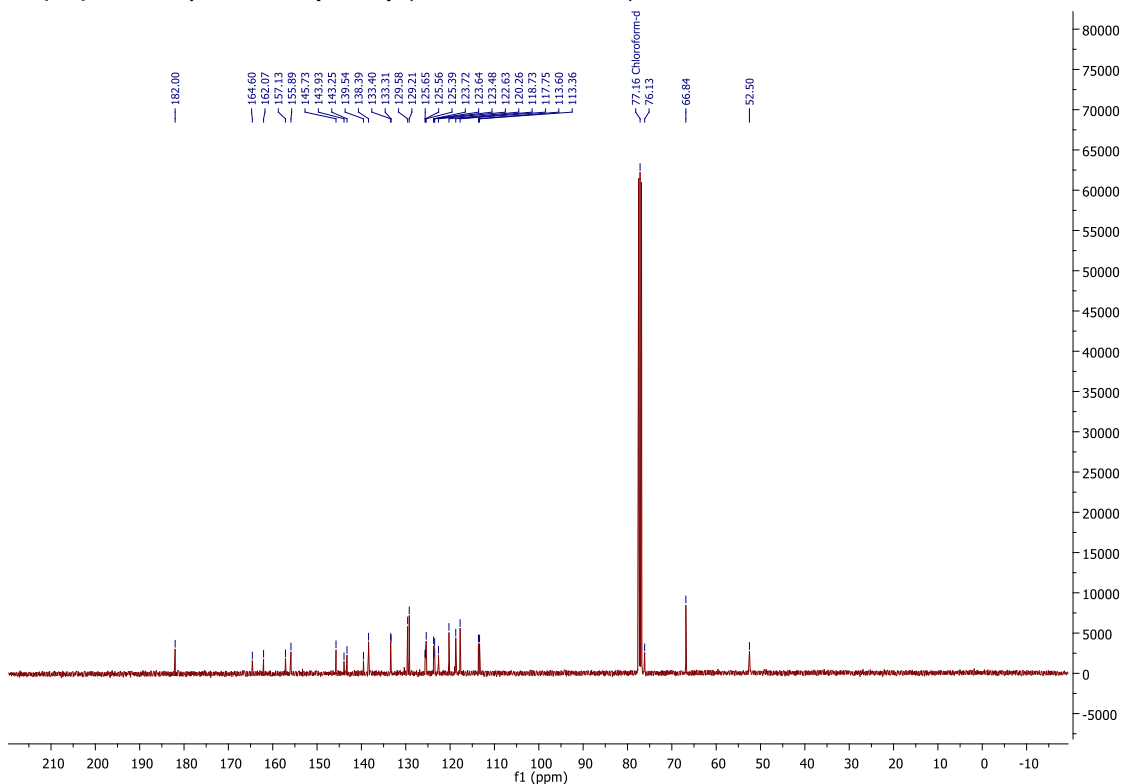



<sup>1</sup>H NMR Spectra of **(5cai)** (400 MHz, CDCl<sub>3</sub>):

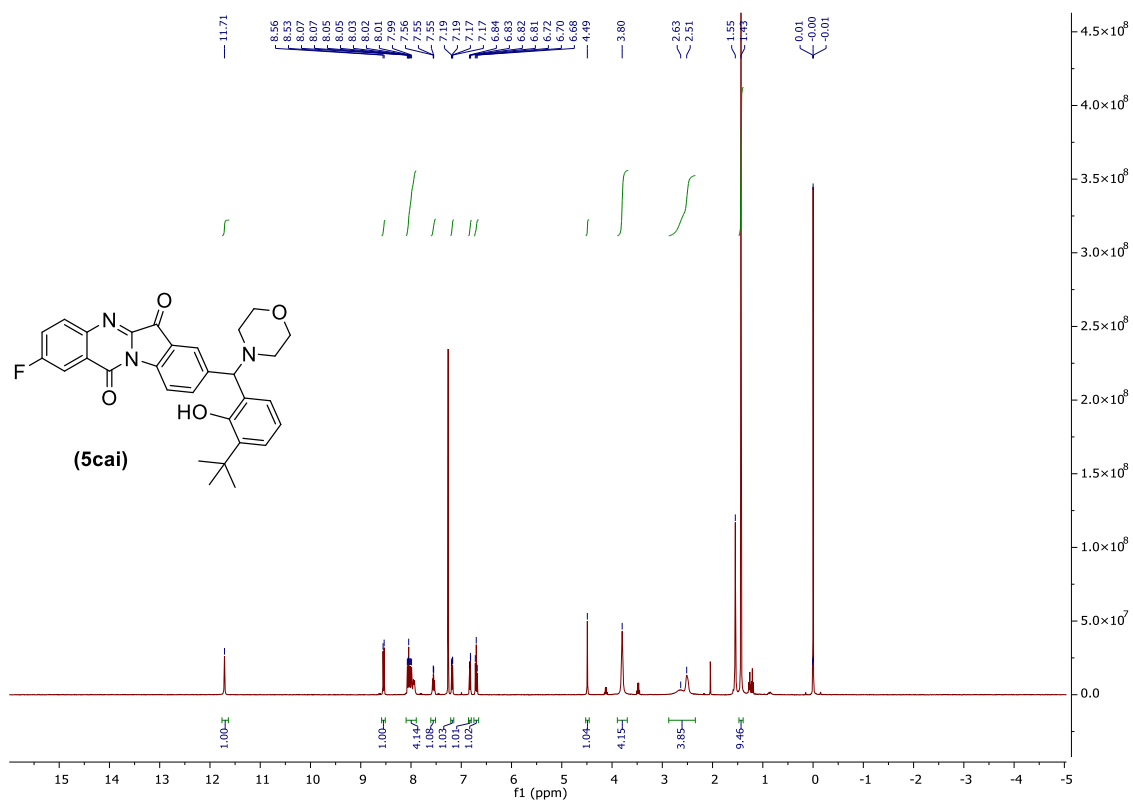

<sup>13</sup>C{<sup>1</sup>H} NMR spectra of **(5cai)** (CDCl<sub>3</sub>, 100 MHz):

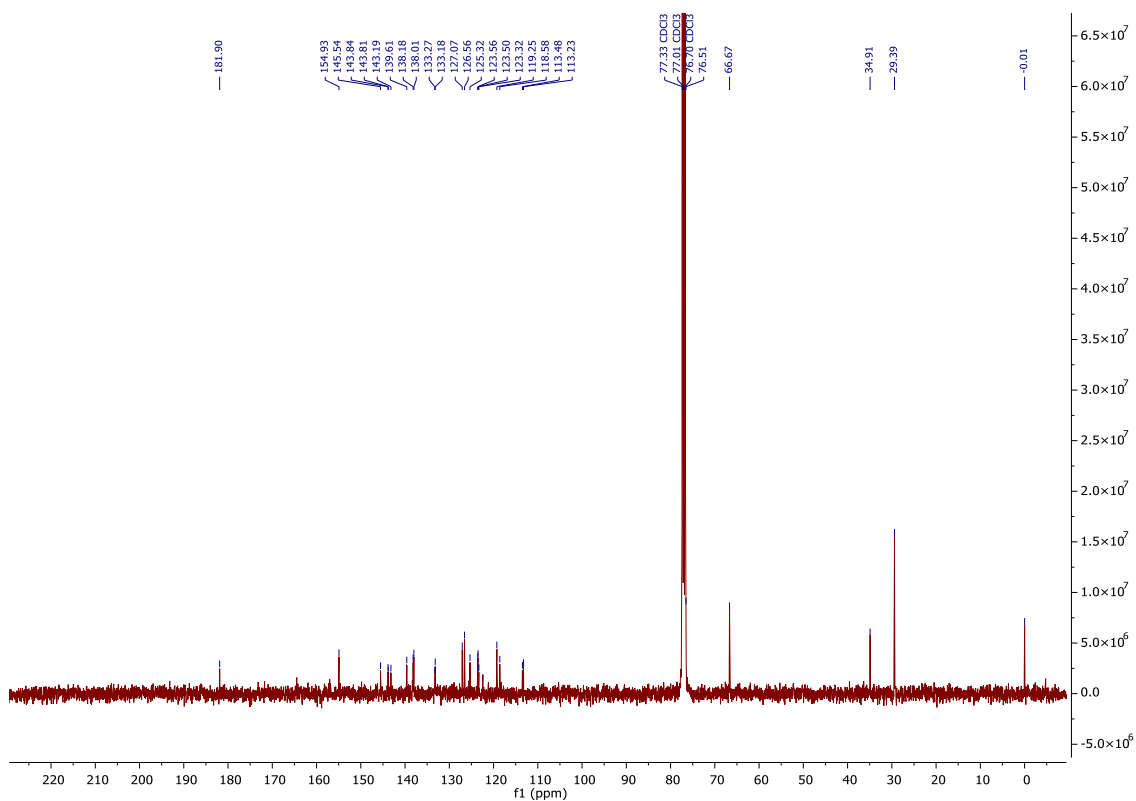

DEPT-135 NMR spectra of **(5cai)** (CDCl<sub>3</sub>, 100 MHz):

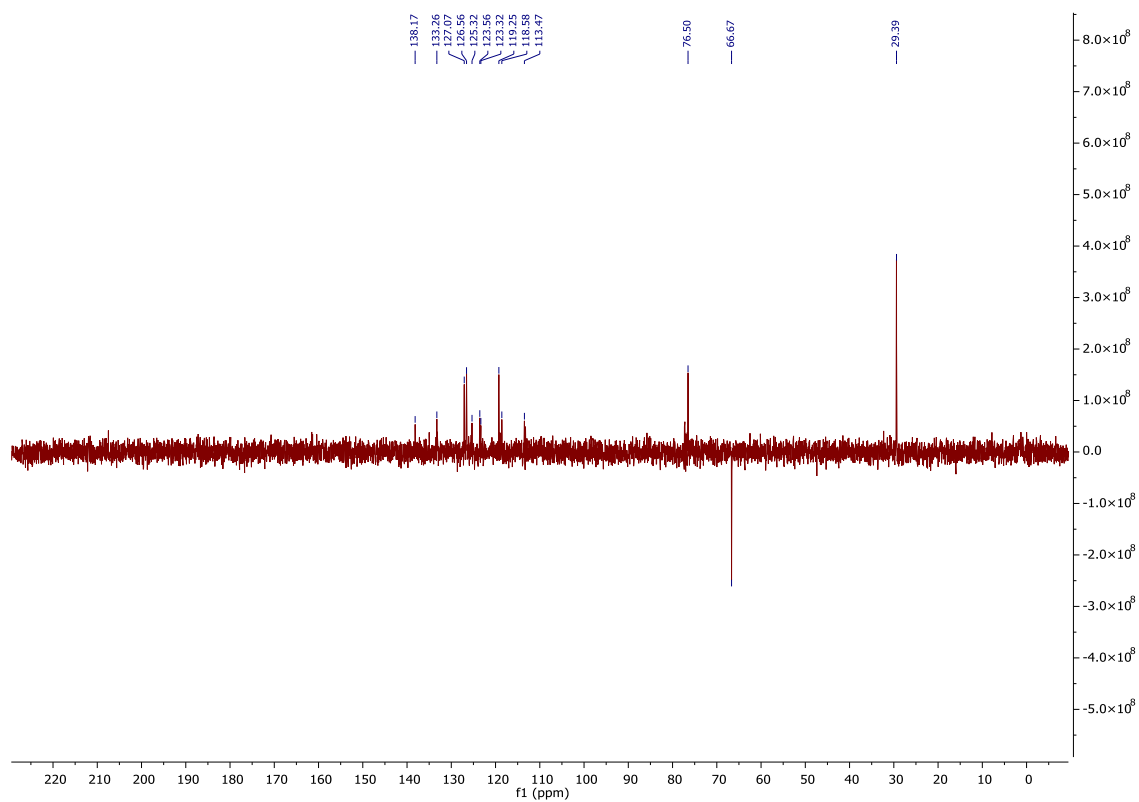

HSQC NMR spectra of **(5cai)** (CDCl<sub>3</sub>)

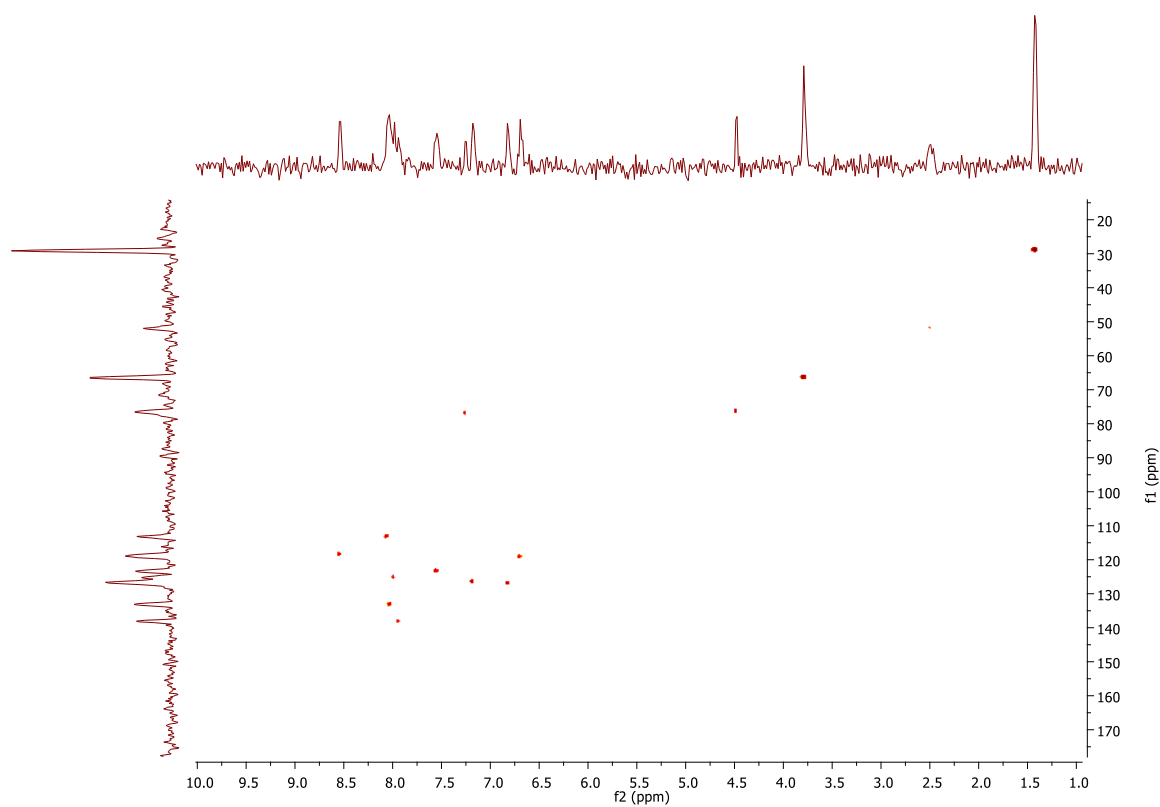

$^1\text{H}$  NMR Spectra of **(5daa)** (400 MHz,  $\text{CDCl}_3$ ):

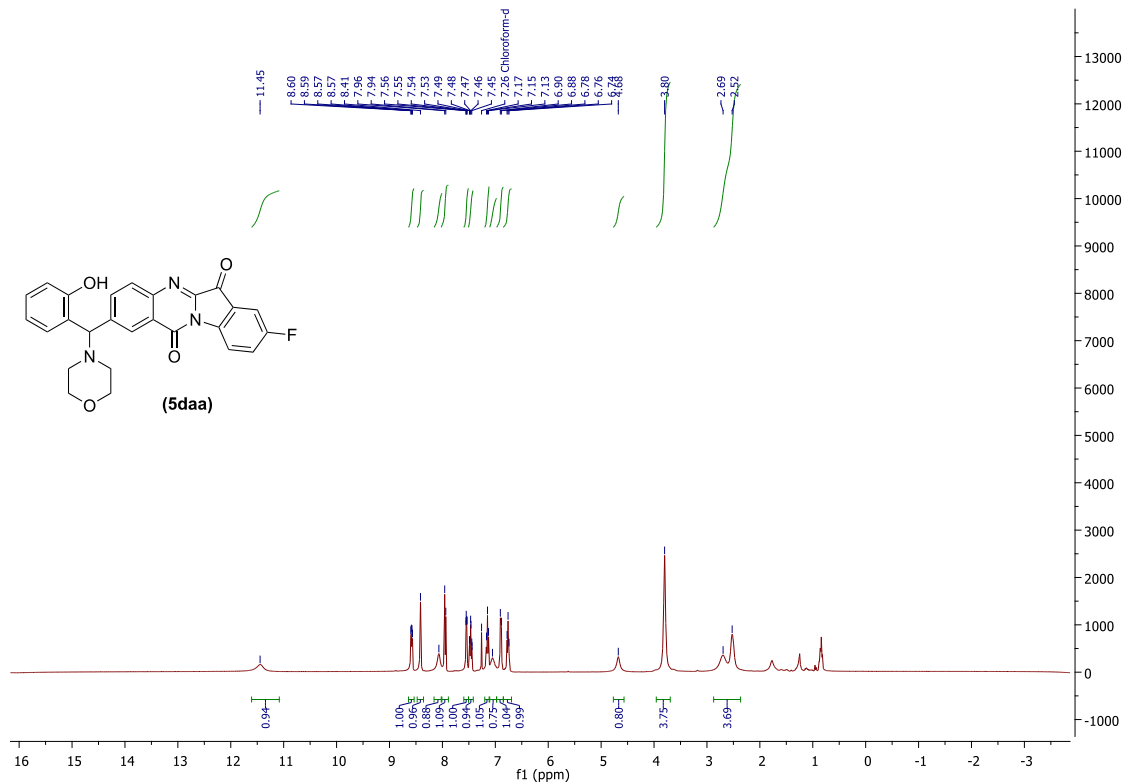

$^{13}\text{C}\{^1\text{H}\}$  NMR spectra of **(5daa)** ( $\text{CDCl}_3$ , 100 MHz):

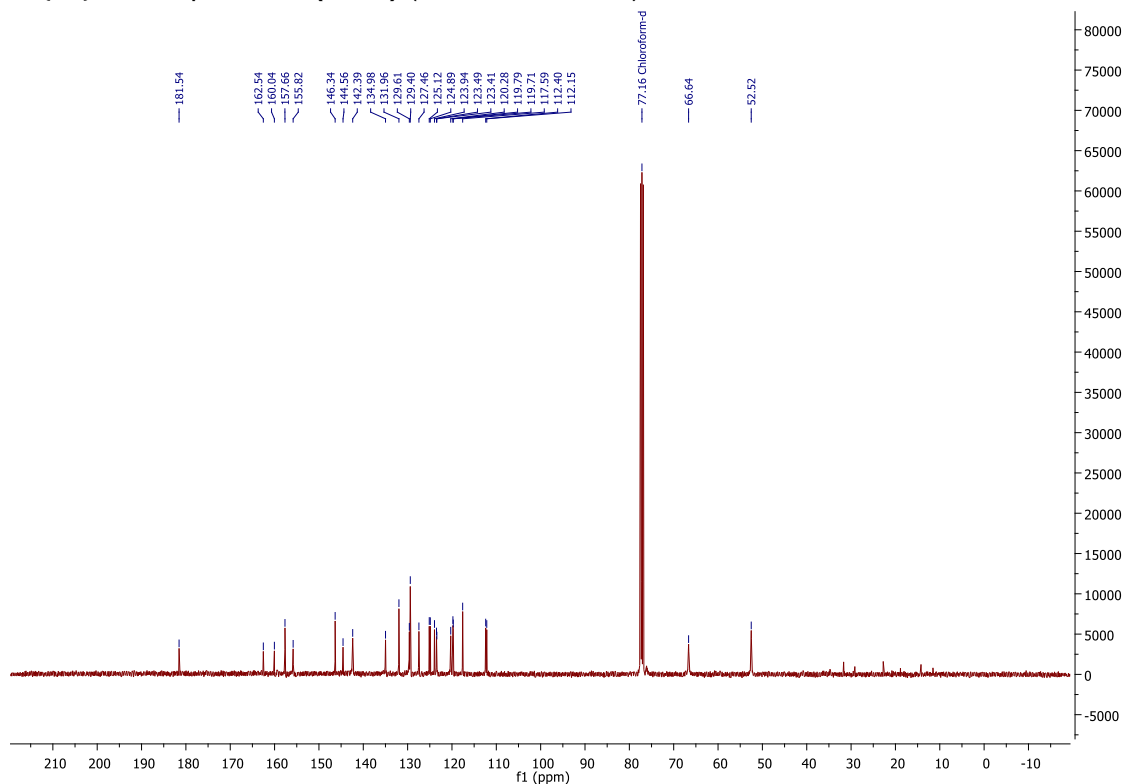

$^1\text{H}$  NMR Spectra of **(5dca)** (400 MHz,  $\text{CDCl}_3$ ):

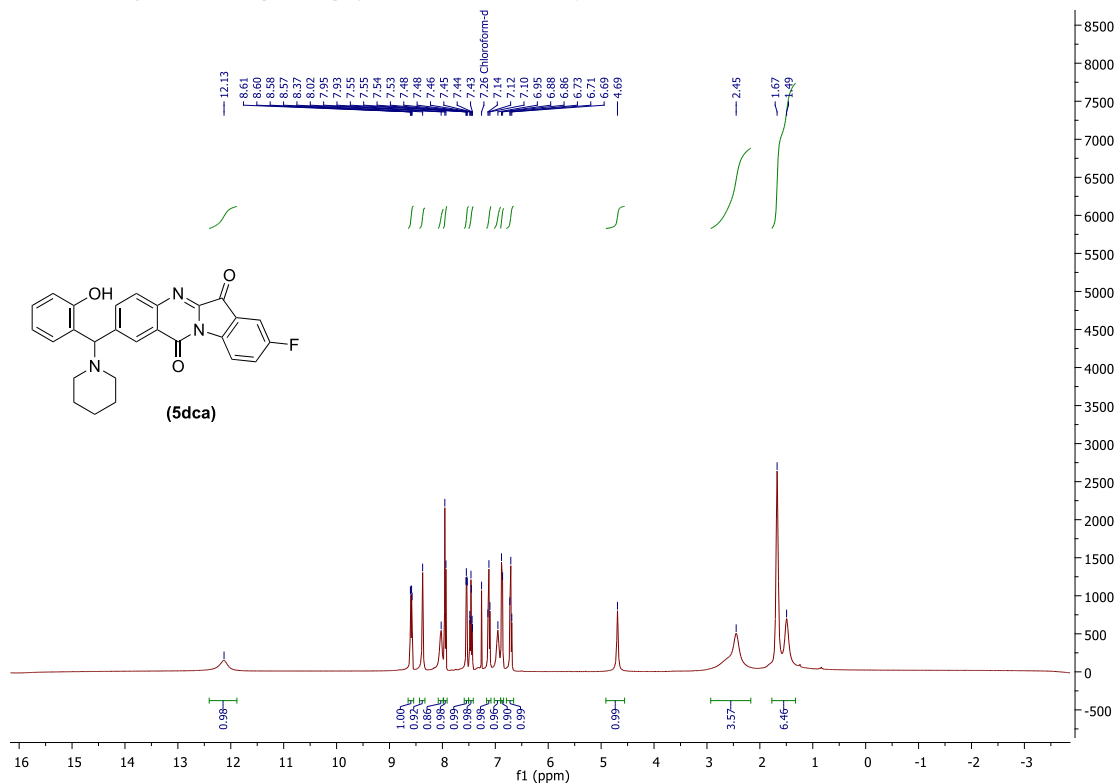

$^{13}\text{C}\{^1\text{H}\}$  NMR spectra of **(5dca)** ( $\text{CDCl}_3$ , 100 MHz):

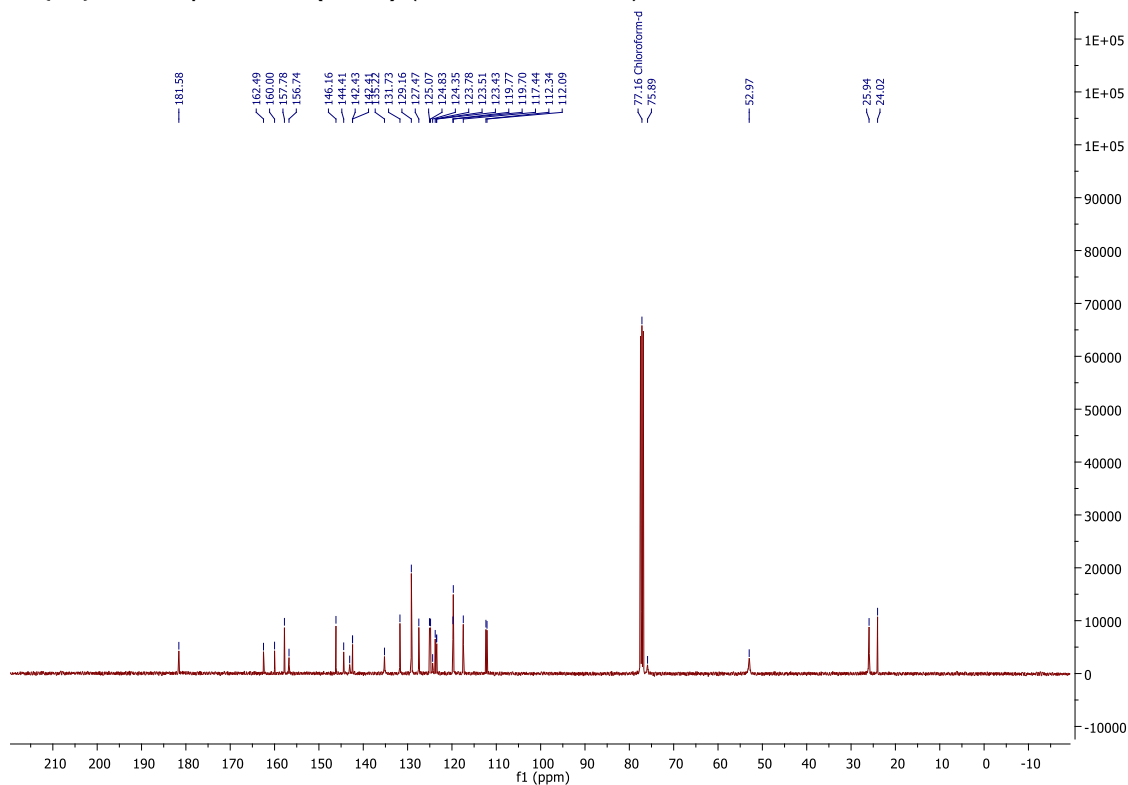

$^1\text{H}$  NMR Spectra of **(5dad)** (400 MHz,  $\text{CDCl}_3$ ):

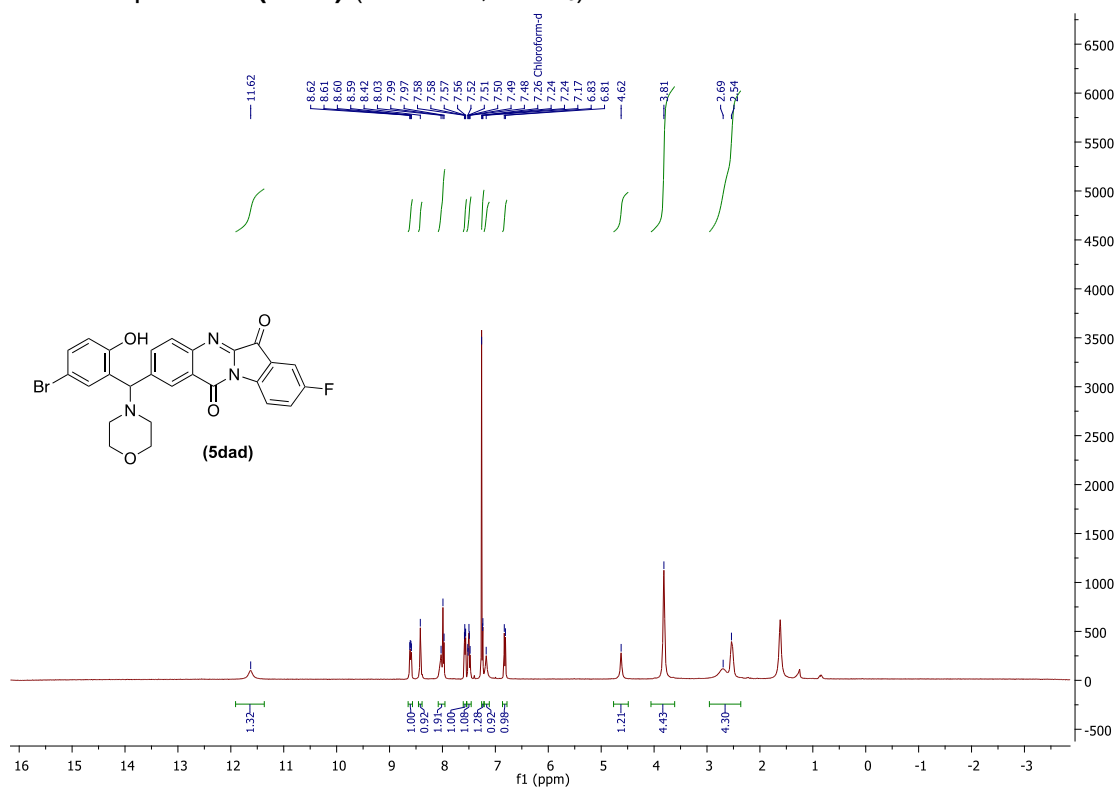

$^{13}\text{C}\{^1\text{H}\}$  NMR spectra of **(5dad)** ( $\text{CDCl}_3$ , 100 MHz):

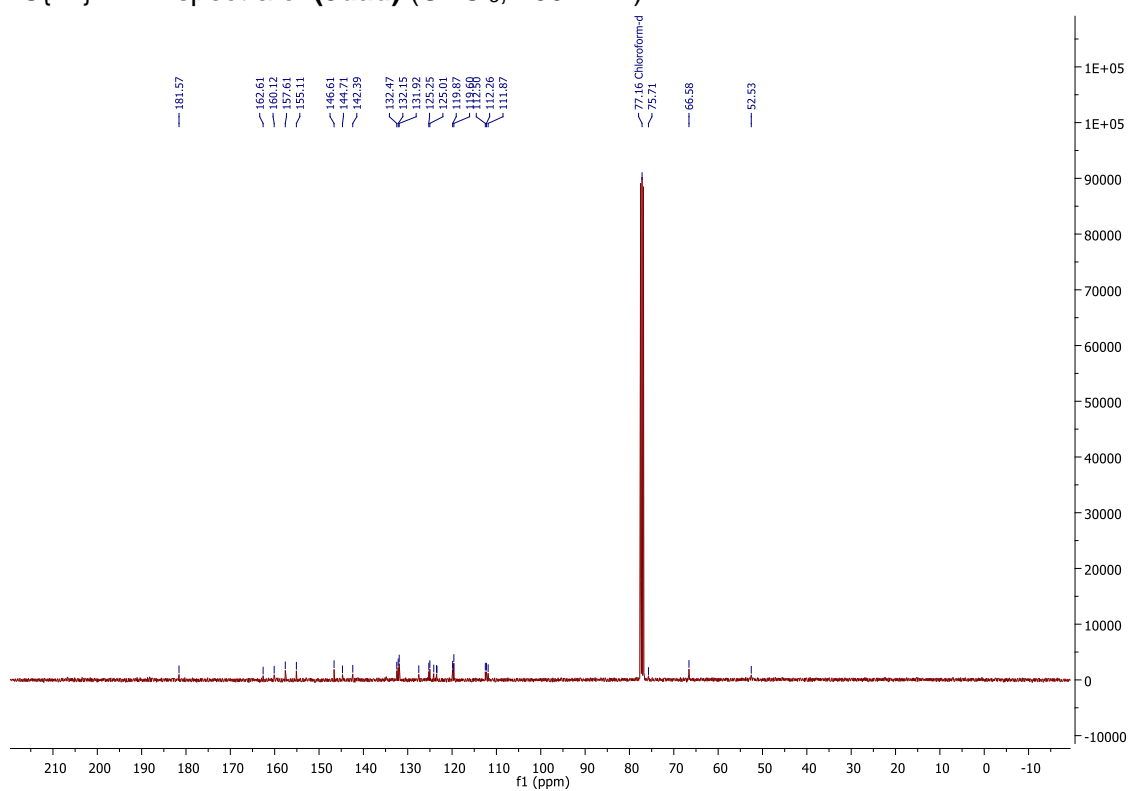

## **6. Antimicrobial Activity Evaluation**

### **Media and microbial strains**

To guarantee the purity and optimal growth, the fungal and bacterial strains were sub-cultured before each assay: yeasts and filamentous fungi on Sabouraud dextrose agar (SDA, bioMérieux, Marcy l'Etoile, France), incubated at 35 °C/24-48 h; dermatophytes on Mycosel agar (MYC, Becton Dickinson, Maryland, USA), incubated for 5–7 days/25 °C; bacteria on Mueller–Hinton agar (MHA, Liofilchem, Roseto degli Abruzzi, Italy), incubated for 24 h/35 °C. RPMI-1640 broth medium, with L-glutamine and without NaHCO<sub>3</sub> (Biochrom GmbH, Berlin, Germany), was buffered with 0.165 mol/L of 3-(N-morpholino)-propanesulfonic acid (MOPS, Sigma-Aldrich, St. Louis, MO, USA) and used on the evaluation of antifungal activity, after pH being adjusted to 7.0 ± 0.2 with 1 mol/L NaOH. Antibacterial activity was tested using Mueller–Hinton broth 2 (MHB2, Becton Dickinson, Maryland, US).

The antifungal activity was evaluated against nine fungal strains: two yeasts (*Candida albicans* ATCC 10231 and *Candida krusei* ATCC 6258); three filamentous fungi (*Aspergillus fumigatus* ATCC 204305, *Aspergillus niger* ATCC 16404 and *Mucor* spp.); four clinical dermatophyte strains *Trichophyton rubrum* FF5, *Trichophyton mentagrophytes* FF7, *Microsporum canis* FF1, and *Nannizzia gypsea* FF3 (formerly *Microsporum gypseum*). The antibacterial activity was evaluated against Gram-negative bacteria (*Escherichia coli* ATCC 25922) and Gram-positive bacteria (*Staphylococcus aureus* ATCC 25923).

### **Antimicrobial susceptibility testing**

The minimum inhibitory concentrations (MICs) and minimal lethal concentrations (MLCs) were used for defining the antimicrobial activity in agreement with the references of the Clinical and Laboratory Standards Institute (CLSI) for broth microdilution tests, with minor modifications [1]: M27-A3 for yeasts, M38-A2 for filamentous fungi and dermatophytes and M100-A25 for bacteria.

A stock solution of the tryptanthrin derivatives was prepared in dimethylsulfoxide (DMSO, Sigma-Aldrich, St. Louis, MO, US). Two-fold serial dilutions in RPMI for fungi and in MHB2 for bacteria were prepared (concentration range 32-512 µg/mL) and distributed in sterile and disposable 96 flat bottom wells microtiter plates. The final concentration of DMSO, used in growth control, did not interfere on the bacterial/fungal growth. Furthermore, other two controls were performed: a sterility control and a quality control, performed with an ATCC reference strain, bacteria with gentamicin (Sigma-Aldrich,

Seelze, Germany) and yeast with voriconazole (kindly provided by Pfizer). Equal volumes of cell suspension and sample dilutions were added in the wells.

MICs were determined as the lowest concentrations resulting in 100% growth inhibition, in comparison to the sample-free controls. From wells showing no visible growth, 10  $\mu$ L of culture were collected and deposited on MHA plates (for bacteria) and SDA (for fungi) to evaluate the MLC, defined as the lowest concentration at which no colonies grew after an incubation of 16–18 h/35 °C for bacteria, 48 h/35 °C for yeasts, *Aspergillus* and *Mucor*, and 5 days/25 °C for dermatophytes.

The compounds were tested at least two times.

#### *Antibacterial Susceptibility Testing*

Pure cultures on MHA/24 h were used to obtain a cell suspensions in sterile saline at a MacFarland standard of 0.5 (530 nm), corresponding to  $1-5 \times 10^6$  cells/mL. The suspension was then diluted in MHB2 to get an inoculum suspension of  $1-5 \times 10^4$  CFU/mL. The plates were incubated aerobically/35 °C/24 h. Gentamicine (0.06–4  $\mu$ g/mL) and *E. coli* (ATCC 25922) were used as a quality control, results being within the recommended limits defined by CLSI.

#### *Antifungal Susceptibility Testing*

Yeast cells suspensions were prepared from pure cultures on SDA/24 h, in sterile saline solution and adjusted to MacFarland standard of 0.5 at 530 nm, corresponding to an initial suspension of  $1-5 \times 10^6$  CFU/mL. This suspension was diluted in RPMI to obtain an inoculum of  $1-5 \times 10^3$  CFU/mL. For filamentous fungi, a spore suspension was prepared from pure culture with spores in SDA (*Aspergillus* and *Mucor*) or MYC (dermatophytes) in sterile saline with one drop of TW20 added. The spores density was evaluated by the spore count and diluted in RPMI to obtain  $1-3 \times 10^3$  CFU/mL for dermatophytes and  $0.4-5 \times 10^4$  CFU/mL for *Aspergillus* and *Mucor*. The plates were incubated aerobically at 35 °C/48 h for *C. albicans*, *Aspergillus* and *Mucor*, and at 25 °C/5–7 days for the dermatophytes. Voriconazole (0.06–2  $\mu$ g/mL) and *C. krusei* ATCC 6258 were used as a quality control, results being within the recommended limits defined by CLSI.

#### References:

[1] CLSI. Clinical and Laboratory Standard Institute, Reference Method for Dilution Antimicrobial Susceptibility Tests. Wayne, PA. Clin. Lab. Stand. Inst. 28. CLSI Document M07-A8 for bacteria, M27-A3 for yeasts and M38-A2 for filamentous fungi.

## 7. SwissADME evaluation of the tryptanthrin-based Petasis adducts

5aaa

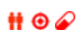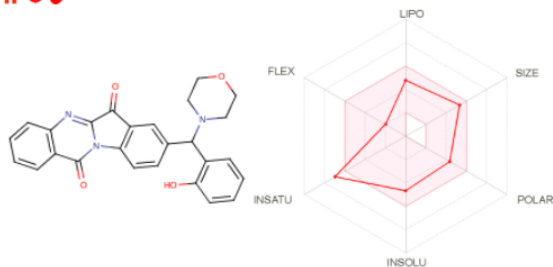

SMILES Oc1ccccc1C(c1ccc2c(c1)C(=O)c1n2c(=O)c2c(n1)cccc2)N1CCOCC1

| Physicochemical Properties       |                                                               |
|----------------------------------|---------------------------------------------------------------|
| Formula                          | C <sub>26</sub> H <sub>21</sub> N <sub>3</sub> O <sub>4</sub> |
| Molecular weight                 | 439.46 g/mol                                                  |
| Num. heavy atoms                 | 33                                                            |
| Num. arom. heavy atoms           | 22                                                            |
| Fraction Csp <sup>3</sup>        | 0.19                                                          |
| Num. rotatable bonds             | 3                                                             |
| Num. H-bond acceptors            | 6                                                             |
| Num. H-bond donors               | 1                                                             |
| Molar Refractivity               | 127.26                                                        |
| TPSA                             | 84.66 Å <sup>2</sup>                                          |
| Lipophilicity                    |                                                               |
| Log P <sub>ow</sub> (iLOGP)      | 3.23                                                          |
| Log P <sub>ow</sub> (XLOGP3)     | 2.85                                                          |
| Log P <sub>ow</sub> (WLOGP)      | 2.35                                                          |
| Log P <sub>ow</sub> (MLOGP)      | 1.90                                                          |
| Log P <sub>ow</sub> (SILICOS-IT) | 3.61                                                          |
| Consensus Log P <sub>ow</sub>    | 2.79                                                          |

| Water Solubility                     |                                 |
|--------------------------------------|---------------------------------|
| Log S (ESOL)                         | -4.66                           |
| Solubility                           | 9.71e-03 mg/ml ; 2.21e-05 mol/l |
| Class                                | Moderately soluble              |
| Log S (Ali)                          | -4.29                           |
| Solubility                           | 2.27e-02 mg/ml ; 5.17e-05 mol/l |
| Class                                | Moderately soluble              |
| Log S (SILICOS-IT)                   | -7.15                           |
| Solubility                           | 3.11e-05 mg/ml ; 7.08e-08 mol/l |
| Class                                | Poorly soluble                  |
| Pharmacokinetics                     |                                 |
| GI absorption                        | High                            |
| BBB permeant                         | No                              |
| P-gp substrate                       | Yes                             |
| CYP1A2 inhibitor                     | No                              |
| CYP2C19 inhibitor                    | No                              |
| CYP2C9 inhibitor                     | Yes                             |
| CYP2D6 inhibitor                     | No                              |
| CYP3A4 inhibitor                     | Yes                             |
| Log K <sub>p</sub> (skin permeation) | -6.96 cm/s                      |
| Druglikeness                         |                                 |
| Lipinski                             | Yes; 0 violation                |
| Ghose                                | Yes                             |
| Veber                                | Yes                             |
| Egan                                 | Yes                             |
| Muegge                               | Yes                             |
| Bioavailability Score                | 0.55                            |
| Medicinal Chemistry                  |                                 |
| PAINS                                | 1 alert: mannich_A              |
| Brenk                                | 0 alert                         |
| Leadlikeness                         | No; 1 violation: MW>350         |
| Synthetic accessibility              | 3.89                            |

5aca

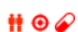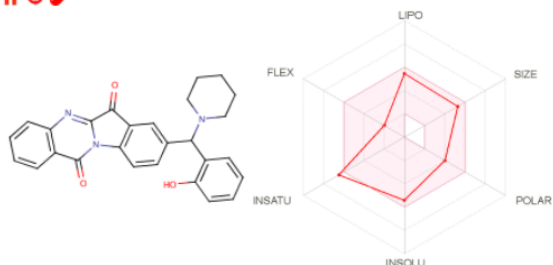

SMILES Oc1ccccc1C(c1ccc2c(c1)C(=O)c1n2c(=O)c2c(n1)cccc2)N1CCCC1

| Physicochemical Properties       |                                                               |
|----------------------------------|---------------------------------------------------------------|
| Formula                          | C <sub>27</sub> H <sub>23</sub> N <sub>3</sub> O <sub>3</sub> |
| Molecular weight                 | 437.49 g/mol                                                  |
| Num. heavy atoms                 | 33                                                            |
| Num. arom. heavy atoms           | 22                                                            |
| Fraction Csp <sup>3</sup>        | 0.22                                                          |
| Num. rotatable bonds             | 3                                                             |
| Num. H-bond acceptors            | 5                                                             |
| Num. H-bond donors               | 1                                                             |
| Molar Refractivity               | 130.98                                                        |
| TPSA                             | 75.43 Å <sup>2</sup>                                          |
| Lipophilicity                    |                                                               |
| Log P <sub>ow</sub> (iLOGP)      | 3.49                                                          |
| Log P <sub>ow</sub> (XLOGP3)     | 4.07                                                          |
| Log P <sub>ow</sub> (WLOGP)      | 3.51                                                          |
| Log P <sub>ow</sub> (MLOGP)      | 2.90                                                          |
| Log P <sub>ow</sub> (SILICOS-IT) | 4.26                                                          |
| Consensus Log P <sub>ow</sub>    | 3.65                                                          |

| Water Solubility                     |                                      |
|--------------------------------------|--------------------------------------|
| Log S (ESOL)                         | -5.41                                |
| Solubility                           | 1.69e-03 mg/ml ; 3.87e-06 mol/l      |
| Class                                | Moderately soluble                   |
| Log S (Ali)                          | -5.36                                |
| Solubility                           | 1.92e-03 mg/ml ; 4.38e-06 mol/l      |
| Class                                | Moderately soluble                   |
| Log S (SILICOS-IT)                   | -7.69                                |
| Solubility                           | 8.93e-06 mg/ml ; 2.04e-08 mol/l      |
| Class                                | Poorly soluble                       |
| Pharmacokinetics                     |                                      |
| GI absorption                        | High                                 |
| BBB permeant                         | Yes                                  |
| P-gp substrate                       | Yes                                  |
| CYP1A2 inhibitor                     | No                                   |
| CYP2C19 inhibitor                    | Yes                                  |
| CYP2C9 inhibitor                     | Yes                                  |
| CYP2D6 inhibitor                     | No                                   |
| CYP3A4 inhibitor                     | Yes                                  |
| Log K <sub>p</sub> (skin permeation) | -6.08 cm/s                           |
| Druglikeness                         |                                      |
| Lipinski                             | Yes; 0 violation                     |
| Ghose                                | No; 1 violation: MR>130              |
| Veber                                | Yes                                  |
| Egan                                 | Yes                                  |
| Muegge                               | Yes                                  |
| Bioavailability Score                | 0.55                                 |
| Medicinal Chemistry                  |                                      |
| PAINS                                | 1 alert: mannich_A                   |
| Brenk                                | 0 alert                              |
| Leadlikeness                         | No; 2 violations: MW>350, XLOGP3>3.5 |
| Synthetic accessibility              | 3.93                                 |



5ada

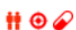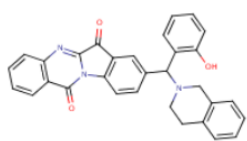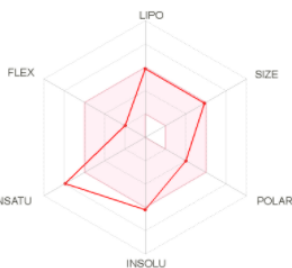

SMILES Oc1cccc1C(c1ccc2c(c1)C(=O)c1n2c(=O)c2c(n1)cccc2)N1CCc2c(C1)cccc2

| Physicochemical Properties       |                                                               |
|----------------------------------|---------------------------------------------------------------|
| Formula                          | C <sub>31</sub> H <sub>23</sub> N <sub>3</sub> O <sub>3</sub> |
| Molecular weight                 | 485.53 g/mol                                                  |
| Num. heavy atoms                 | 37                                                            |
| Num. arom. heavy atoms           | 28                                                            |
| Fraction Csp <sup>3</sup>        | 0.13                                                          |
| Num. rotatable bonds             | 3                                                             |
| Num. H-bond acceptors            | 5                                                             |
| Num. H-bond donors               | 1                                                             |
| Molar Refractivity               | 146.01                                                        |
| TPSA                             | 75.43 Å <sup>2</sup>                                          |
| Lipophilicity                    |                                                               |
| Log P <sub>ow</sub> (ILOGP)      | 3.76                                                          |
| Log P <sub>ow</sub> (XLOGP3)     | 4.76                                                          |
| Log P <sub>ow</sub> (WLOGP)      | 3.93                                                          |
| Log P <sub>ow</sub> (MLOGP)      | 3.48                                                          |
| Log P <sub>ow</sub> (SILICOS-IT) | 5.09                                                          |
| Consensus Log P <sub>ow</sub>    | 4.20                                                          |

| Water Solubility                     |                                      |
|--------------------------------------|--------------------------------------|
| Log S (ESOL)                         | -6.21                                |
| Solubility                           | 2.99e-04 mg/ml ; 6.15e-07 mol/l      |
| Class                                | Poorly soluble                       |
| Log S (Ali)                          | -6.07                                |
| Solubility                           | 4.09e-04 mg/ml ; 8.42e-07 mol/l      |
| Class                                | Poorly soluble                       |
| Log S (SILICOS-IT)                   | -9.60                                |
| Solubility                           | 1.22e-07 mg/ml ; 2.52e-10 mol/l      |
| Class                                | Poorly soluble                       |
| Pharmacokinetics                     |                                      |
| GI absorption                        | High                                 |
| BBB permeant                         | Yes                                  |
| P-gp substrate                       | No                                   |
| CYP1A2 inhibitor                     | Yes                                  |
| CYP2C19 inhibitor                    | Yes                                  |
| CYP2C9 inhibitor                     | Yes                                  |
| CYP2D6 inhibitor                     | No                                   |
| CYP3A4 inhibitor                     | No                                   |
| Log K <sub>p</sub> (skin permeation) | -5.88 cm/s                           |
| Druglikeness                         |                                      |
| Lipinski                             | Yes; 0 violation                     |
| Ghose                                | No; 2 violations: MW>480, MR>130     |
| Veber                                | Yes                                  |
| Egan                                 | Yes                                  |
| Muegge                               | Yes                                  |
| Bioavailability Score                | 0.55                                 |
| Medicinal Chemistry                  |                                      |
| PAINS                                | 1 alert: mannich_A                   |
| Brenk                                | 0 alert                              |
| Leadlikeness                         | No; 2 violations: MW>350, XLOGP3>3.5 |
| Synthetic accessibility              | 4.16                                 |

5aac

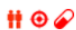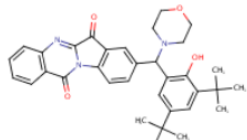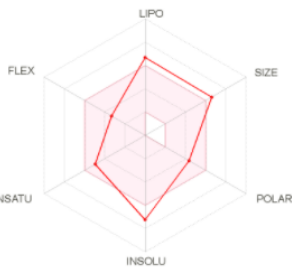

SMILES O=C1c2nc3cccc3c(=O)n2c2c1cc(cc2)C(c1cc(cc1O)C)C(C)C(C)C(C)C)N1CCOCC1

| Physicochemical Properties       |                                                               |
|----------------------------------|---------------------------------------------------------------|
| Formula                          | C <sub>34</sub> H <sub>37</sub> N <sub>3</sub> O <sub>4</sub> |
| Molecular weight                 | 551.68 g/mol                                                  |
| Num. heavy atoms                 | 41                                                            |
| Num. arom. heavy atoms           | 22                                                            |
| Fraction Csp <sup>3</sup>        | 0.38                                                          |
| Num. rotatable bonds             | 5                                                             |
| Num. H-bond acceptors            | 6                                                             |
| Num. H-bond donors               | 1                                                             |
| Molar Refractivity               | 165.80                                                        |
| TPSA                             | 84.66 Å <sup>2</sup>                                          |
| Lipophilicity                    |                                                               |
| Log P <sub>ow</sub> (ILOGP)      | 4.63                                                          |
| Log P <sub>ow</sub> (XLOGP3)     | 6.20                                                          |
| Log P <sub>ow</sub> (WLOGP)      | 4.95                                                          |
| Log P <sub>ow</sub> (MLOGP)      | 3.44                                                          |
| Log P <sub>ow</sub> (SILICOS-IT) | 6.44                                                          |
| Consensus Log P <sub>ow</sub>    | 5.13                                                          |

| Water Solubility                     |                                             |
|--------------------------------------|---------------------------------------------|
| Log S (ESOL)                         | -7.23                                       |
| Solubility                           | 3.22e-05 mg/ml ; 5.84e-08 mol/l             |
| Class                                | Poorly soluble                              |
| Log S (Ali)                          | -7.76                                       |
| Solubility                           | 9.53e-06 mg/ml ; 1.73e-08 mol/l             |
| Class                                | Poorly soluble                              |
| Log S (SILICOS-IT)                   | -9.45                                       |
| Solubility                           | 1.98e-07 mg/ml ; 3.59e-10 mol/l             |
| Class                                | Poorly soluble                              |
| Pharmacokinetics                     |                                             |
| GI absorption                        | High                                        |
| BBB permeant                         | No                                          |
| P-gp substrate                       | Yes                                         |
| CYP1A2 inhibitor                     | No                                          |
| CYP2C19 inhibitor                    | Yes                                         |
| CYP2C9 inhibitor                     | Yes                                         |
| CYP2D6 inhibitor                     | No                                          |
| CYP3A4 inhibitor                     | No                                          |
| Log K <sub>p</sub> (skin permeation) | -5.26 cm/s                                  |
| Druglikeness                         |                                             |
| Lipinski                             | Yes; 1 violation: MW>500                    |
| Ghose                                | No; 3 violations: MW>480, MR>130, #atoms>70 |
| Veber                                | Yes                                         |
| Egan                                 | Yes                                         |
| Muegge                               | No; 1 violation: XLOGP3>5                   |
| Bioavailability Score                | 0.55                                        |
| Medicinal Chemistry                  |                                             |
| PAINS                                | 1 alert: mannich_A                          |
| Brenk                                | 0 alert                                     |
| Leadlikeness                         | No; 2 violations: MW>350, XLOGP3>3.5        |
| Synthetic accessibility              | 4.84                                        |

5aad

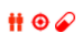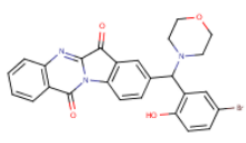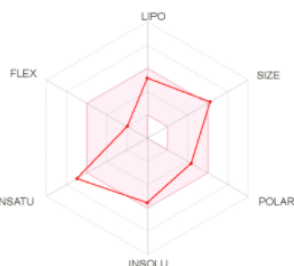

SMILES Brc1ccc(c1)C(c1ccc2c(c1)C(=O)c1n2c(=O)c2c(n1)cccc2)N1CCOCC1O

| Physicochemical Properties              |                                                                 |
|-----------------------------------------|-----------------------------------------------------------------|
| Formula                                 | C <sub>26</sub> H <sub>20</sub> BrN <sub>3</sub> O <sub>4</sub> |
| Molecular weight                        | 518.36 g/mol                                                    |
| Num. heavy atoms                        | 34                                                              |
| Num. arom. heavy atoms                  | 22                                                              |
| Fraction Csp <sup>3</sup>               | 0.19                                                            |
| Num. rotatable bonds                    | 3                                                               |
| Num. H-bond acceptors                   | 6                                                               |
| Num. H-bond donors                      | 1                                                               |
| Molar Refractivity                      | 134.96                                                          |
| TPSA                                    | 84.66 Å <sup>2</sup>                                            |
| Lipophilicity                           |                                                                 |
| Log <i>P</i> <sub>ow</sub> (iLOGP)      | 3.55                                                            |
| Log <i>P</i> <sub>ow</sub> (XLOGP3)     | 3.54                                                            |
| Log <i>P</i> <sub>ow</sub> (WLOGP)      | 3.11                                                            |
| Log <i>P</i> <sub>ow</sub> (MLOGP)      | 2.20                                                            |
| Log <i>P</i> <sub>ow</sub> (SILICOS-IT) | 4.29                                                            |
| Consensus Log <i>P</i> <sub>ow</sub>    | 3.34                                                            |

| Water Solubility                            |                                      |
|---------------------------------------------|--------------------------------------|
| Log S (ESOL)                                | -5.56                                |
| Solubility                                  | 1.41e-03 mg/ml ; 2.72e-06 mol/l      |
| Class                                       | Moderately soluble                   |
| Log S (Ali)                                 | -5.00                                |
| Solubility                                  | 5.15e-03 mg/ml ; 9.94e-06 mol/l      |
| Class                                       | Moderately soluble                   |
| Log S (SILICOS-IT)                          | -7.92                                |
| Solubility                                  | 6.28e-06 mg/ml ; 1.21e-08 mol/l      |
| Class                                       | Poorly soluble                       |
| Pharmacokinetics                            |                                      |
| GI absorption                               | High                                 |
| BBB permeant                                | No                                   |
| P-gp substrate                              | Yes                                  |
| CYP1A2 inhibitor                            | No                                   |
| CYP2C19 inhibitor                           | Yes                                  |
| CYP2C9 inhibitor                            | Yes                                  |
| CYP2D6 inhibitor                            | No                                   |
| CYP3A4 inhibitor                            | Yes                                  |
| Log <i>K</i> <sub>p</sub> (skin permeation) | -6.95 cm/s                           |
| Druglikeness                                |                                      |
| Lipinski                                    | Yes; 1 violation: MW>500             |
| Ghose                                       | No; 2 violations: MW>480, MR>130     |
| Veber                                       | Yes                                  |
| Egan                                        | Yes                                  |
| Muegge                                      | Yes                                  |
| Bioavailability Score                       | 0.55                                 |
| Medicinal Chemistry                         |                                      |
| PAINS                                       | 1 alert: mannich_A                   |
| Brenk                                       | 0 alert                              |
| Leadlikeness                                | No; 2 violations: MW>350, XLOGP3>3.5 |
| Synthetic accessibility                     | 3.95                                 |

5aaf

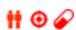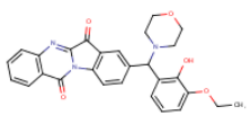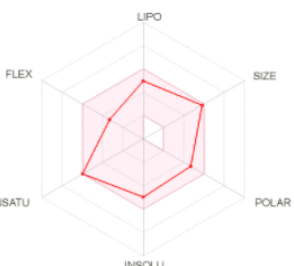

SMILES CCOC1CCCC(C1O)C(c1ccc2c(c1)C(=O)c1n2c(=O)c2c(n1)cccc2)N1CCOCC1

| Physicochemical Properties              |                                                               |
|-----------------------------------------|---------------------------------------------------------------|
| Formula                                 | C <sub>28</sub> H <sub>25</sub> N <sub>3</sub> O <sub>5</sub> |
| Molecular weight                        | 483.52 g/mol                                                  |
| Num. heavy atoms                        | 36                                                            |
| Num. arom. heavy atoms                  | 22                                                            |
| Fraction Csp <sup>3</sup>               | 0.25                                                          |
| Num. rotatable bonds                    | 5                                                             |
| Num. H-bond acceptors                   | 7                                                             |
| Num. H-bond donors                      | 1                                                             |
| Molar Refractivity                      | 138.56                                                        |
| TPSA                                    | 93.89 Å <sup>2</sup>                                          |
| Lipophilicity                           |                                                               |
| Log <i>P</i> <sub>ow</sub> (iLOGP)      | 3.70                                                          |
| Log <i>P</i> <sub>ow</sub> (XLOGP3)     | 3.19                                                          |
| Log <i>P</i> <sub>ow</sub> (WLOGP)      | 2.75                                                          |
| Log <i>P</i> <sub>ow</sub> (MLOGP)      | 1.78                                                          |
| Log <i>P</i> <sub>ow</sub> (SILICOS-IT) | 4.07                                                          |
| Consensus Log <i>P</i> <sub>ow</sub>    | 3.10                                                          |

| Water Solubility                            |                                  |
|---------------------------------------------|----------------------------------|
| Log S (ESOL)                                | -4.97                            |
| Solubility                                  | 5.18e-03 mg/ml ; 1.07e-05 mol/l  |
| Class                                       | Moderately soluble               |
| Log S (Ali)                                 | -4.83                            |
| Solubility                                  | 7.10e-03 mg/ml ; 1.47e-05 mol/l  |
| Class                                       | Moderately soluble               |
| Log S (SILICOS-IT)                          | -7.64                            |
| Solubility                                  | 1.12e-05 mg/ml ; 2.31e-08 mol/l  |
| Class                                       | Poorly soluble                   |
| Pharmacokinetics                            |                                  |
| GI absorption                               | High                             |
| BBB permeant                                | No                               |
| P-gp substrate                              | Yes                              |
| CYP1A2 inhibitor                            | No                               |
| CYP2C19 inhibitor                           | No                               |
| CYP2C9 inhibitor                            | Yes                              |
| CYP2D6 inhibitor                            | Yes                              |
| CYP3A4 inhibitor                            | Yes                              |
| Log <i>K</i> <sub>p</sub> (skin permeation) | -6.98 cm/s                       |
| Druglikeness                                |                                  |
| Lipinski                                    | Yes; 0 violation                 |
| Ghose                                       | No; 2 violations: MW>480, MR>130 |
| Veber                                       | Yes                              |
| Egan                                        | Yes                              |
| Muegge                                      | Yes                              |
| Bioavailability Score                       | 0.55                             |
| Medicinal Chemistry                         |                                  |
| PAINS                                       | 1 alert: mannich_A               |
| Brenk                                       | 0 alert                          |
| Leadlikeness                                | No; 1 violation: MW>350          |
| Synthetic accessibility                     | 4.20                             |

5aagc

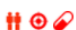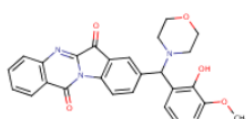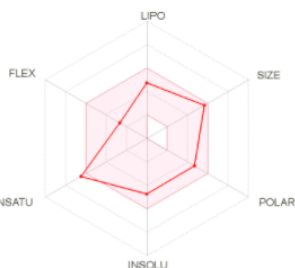

SMILES COC1CCCC(C1O)C(C1CC2C(C1)C(=O)C1N2C(=O)C2C(N1)CCCC2)N1CCOCC1

| Physicochemical Properties       |                      |
|----------------------------------|----------------------|
| Formula                          | C27H23N3O5           |
| Molecular weight                 | 469.49 g/mol         |
| Num. heavy atoms                 | 35                   |
| Num. arom. heavy atoms           | 22                   |
| Fraction Csp3                    | 0.22                 |
| Num. rotatable bonds             | 4                    |
| Num. H-bond acceptors            | 7                    |
| Num. H-bond donors               | 1                    |
| Molar Refractivity               | 133.75               |
| TPSA                             | 93.89 Å <sup>2</sup> |
| Lipophilicity                    |                      |
| Log P <sub>ow</sub> (iLOGP)      | 3.45                 |
| Log P <sub>ow</sub> (XLOGP3)     | 2.82                 |
| Log P <sub>ow</sub> (WLOGP)      | 2.36                 |
| Log P <sub>ow</sub> (MLOGP)      | 1.58                 |
| Log P <sub>ow</sub> (SILICOS-IT) | 3.67                 |
| Consensus Log P <sub>ow</sub>    | 2.78                 |

| Water Solubility                     |                                 |
|--------------------------------------|---------------------------------|
| Log S (ESOL)                         | -4.73                           |
| Solubility                           | 8.77e-03 mg/ml ; 1.87e-05 mol/l |
| Class                                | Moderately soluble              |
| Log S (Alii)                         | -4.45                           |
| Solubility                           | 1.67e-02 mg/ml ; 3.55e-05 mol/l |
| Class                                | Moderately soluble              |
| Log S (SILICOS-IT)                   | -7.25                           |
| Solubility                           | 2.66e-05 mg/ml ; 5.66e-08 mol/l |
| Class                                | Poorly soluble                  |
| Pharmacokinetics                     |                                 |
| GI absorption                        | High                            |
| BBB permeant                         | No                              |
| P-gp substrate                       | Yes                             |
| CYP1A2 inhibitor                     | No                              |
| CYP2C19 inhibitor                    | No                              |
| CYP2C9 inhibitor                     | Yes                             |
| CYP2D6 inhibitor                     | No                              |
| CYP3A4 inhibitor                     | Yes                             |
| Log K <sub>p</sub> (skin permeation) | -7.16 cm/s                      |
| Druglikeness                         |                                 |
| Lipinski                             | Yes; 0 violation                |
| Ghose                                | No; 1 violation: MR>130         |
| Veber                                | Yes                             |
| Egan                                 | Yes                             |
| Muegge                               | Yes                             |
| Bioavailability Score                | 0.55                            |
| Medicinal Chemistry                  |                                 |
| PAINS                                | 1 alert: mannich_A              |
| Brenk                                | 0 alert                         |
| Leadlikeness                         | No; 1 violation: MW>350         |
| Synthetic accessibility              | 4.08                            |

5aai

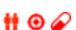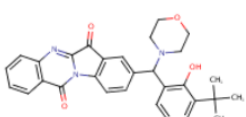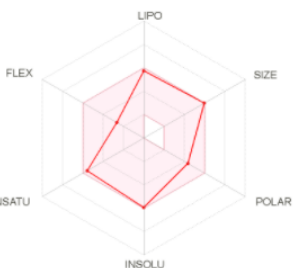

SMILES O=C1c2nc3cccc3c(=O)n2c2c1cc(cc2)C(c1cccc(c1O)C(C)(C)N1CCOCC1

| Physicochemical Properties       |                      |
|----------------------------------|----------------------|
| Formula                          | C30H29N3O4           |
| Molecular weight                 | 495.57 g/mol         |
| Num. heavy atoms                 | 37                   |
| Num. arom. heavy atoms           | 22                   |
| Fraction Csp3                    | 0.30                 |
| Num. rotatable bonds             | 4                    |
| Num. H-bond acceptors            | 6                    |
| Num. H-bond donors               | 1                    |
| Molar Refractivity               | 146.53               |
| TPSA                             | 84.66 Å <sup>2</sup> |
| Lipophilicity                    |                      |
| Log P <sub>ow</sub> (iLOGP)      | 3.99                 |
| Log P <sub>ow</sub> (XLOGP3)     | 4.53                 |
| Log P <sub>ow</sub> (WLOGP)      | 3.65                 |
| Log P <sub>ow</sub> (MLOGP)      | 2.69                 |
| Log P <sub>ow</sub> (SILICOS-IT) | 5.01                 |
| Consensus Log P <sub>ow</sub>    | 3.97                 |

| Water Solubility                     |                                      |
|--------------------------------------|--------------------------------------|
| Log S (ESOL)                         | -5.94                                |
| Solubility                           | 5.66e-04 mg/ml ; 1.14e-06 mol/l      |
| Class                                | Moderately soluble                   |
| Log S (Alii)                         | -6.03                                |
| Solubility                           | 4.63e-04 mg/ml ; 9.34e-07 mol/l      |
| Class                                | Poorly soluble                       |
| Log S (SILICOS-IT)                   | -8.30                                |
| Solubility                           | 2.48e-06 mg/ml ; 5.00e-09 mol/l      |
| Class                                | Poorly soluble                       |
| Pharmacokinetics                     |                                      |
| GI absorption                        | High                                 |
| BBB permeant                         | No                                   |
| P-gp substrate                       | Yes                                  |
| CYP1A2 inhibitor                     | No                                   |
| CYP2C19 inhibitor                    | Yes                                  |
| CYP2C9 inhibitor                     | Yes                                  |
| CYP2D6 inhibitor                     | Yes                                  |
| CYP3A4 inhibitor                     | Yes                                  |
| Log K <sub>p</sub> (skin permeation) | -6.11 cm/s                           |
| Druglikeness                         |                                      |
| Lipinski                             | Yes; 0 violation                     |
| Ghose                                | No; 2 violations: MW>480, MR>130     |
| Veber                                | Yes                                  |
| Egan                                 | Yes                                  |
| Muegge                               | Yes                                  |
| Bioavailability Score                | 0.55                                 |
| Medicinal Chemistry                  |                                      |
| PAINS                                | 1 alert: mannich_A                   |
| Brenk                                | 0 alert                              |
| Leadlikeness                         | No; 2 violations: MW>350, XLOGP3>3.5 |
| Synthetic accessibility              | 4.36                                 |

5baa

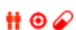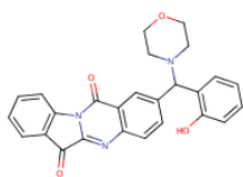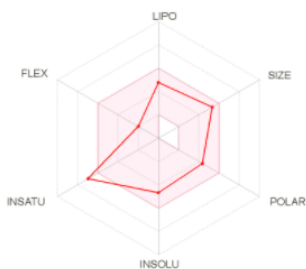

SMILES Oc1cccc1C(c1ccc2c(c1)c(=O)n1c(n2)C(=O)c2c1cccc2)N1CCOCC

| Physicochemical Properties       |                                                               |
|----------------------------------|---------------------------------------------------------------|
| Formula                          | C <sub>26</sub> H <sub>21</sub> N <sub>3</sub> O <sub>4</sub> |
| Molecular weight                 | 439.46 g/mol                                                  |
| Num. heavy atoms                 | 33                                                            |
| Num. arom. heavy atoms           | 22                                                            |
| Fraction Csp <sup>3</sup>        | 0.19                                                          |
| Num. rotatable bonds             | 3                                                             |
| Num. H-bond acceptors            | 6                                                             |
| Num. H-bond donors               | 1                                                             |
| Molar Refractivity               | 127.26                                                        |
| TPSA                             | 84.66 Å <sup>2</sup>                                          |
| Lipophilicity                    |                                                               |
| Log P <sub>ow</sub> (iLOGP)      | 3.21                                                          |
| Log P <sub>ow</sub> (XLOGP3)     | 2.85                                                          |
| Log P <sub>ow</sub> (WLOGP)      | 2.35                                                          |
| Log P <sub>ow</sub> (MLOGP)      | 2.31                                                          |
| Log P <sub>ow</sub> (SILICOS-IT) | 3.61                                                          |
| Consensus Log P <sub>ow</sub>    | 2.87                                                          |

| Water Solubility                     |                                 |
|--------------------------------------|---------------------------------|
| Log S (ESOL)                         | -4.66                           |
| Solubility                           | 9.71e-03 mg/ml ; 2.21e-05 mol/l |
| Class                                | Moderately soluble              |
| Log S (Alii)                         | -4.29                           |
| Solubility                           | 2.27e-02 mg/ml ; 5.17e-05 mol/l |
| Class                                | Moderately soluble              |
| Log S (SILICOS-IT)                   | -7.15                           |
| Solubility                           | 3.11e-05 mg/ml ; 7.08e-08 mol/l |
| Class                                | Poorly soluble                  |
| Pharmacokinetics                     |                                 |
| GI absorption                        | High                            |
| BBB permeant                         | No                              |
| P-gp substrate                       | Yes                             |
| CYP1A2 inhibitor                     | No                              |
| CYP2C19 inhibitor                    | No                              |
| CYP2C9 inhibitor                     | Yes                             |
| CYP2D6 inhibitor                     | No                              |
| CYP3A4 inhibitor                     | Yes                             |
| Log K <sub>p</sub> (skin permeation) | -6.96 cm/s                      |
| Druglikeness                         |                                 |
| Lipinski                             | Yes; 0 violation                |
| Ghose                                | Yes                             |
| Veber                                | Yes                             |
| Egan                                 | Yes                             |
| Muegge                               | Yes                             |
| Bioavailability Score                | 0.55                            |
| Medicinal Chemistry                  |                                 |
| PAINS                                | 1 alert: mannich_A              |
| Brenk                                | 0 alert                         |
| Leadlikeness                         | No; 1 violation: MW>350         |
| Synthetic accessibility              | 3.86                            |

5bca

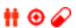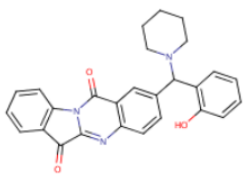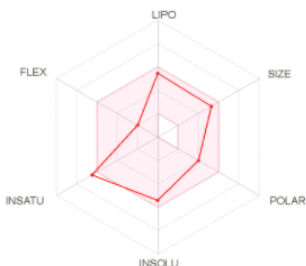

SMILES Oc1cccc1C(c1ccc2c(c1)c(=O)n1c(n2)C(=O)c2c1cccc2)N1CCCC

| Physicochemical Properties       |                                                               |
|----------------------------------|---------------------------------------------------------------|
| Formula                          | C <sub>27</sub> H <sub>23</sub> N <sub>3</sub> O <sub>3</sub> |
| Molecular weight                 | 437.49 g/mol                                                  |
| Num. heavy atoms                 | 33                                                            |
| Num. arom. heavy atoms           | 22                                                            |
| Fraction Csp <sup>3</sup>        | 0.22                                                          |
| Num. rotatable bonds             | 3                                                             |
| Num. H-bond acceptors            | 5                                                             |
| Num. H-bond donors               | 1                                                             |
| Molar Refractivity               | 130.98                                                        |
| TPSA                             | 75.43 Å <sup>2</sup>                                          |
| Lipophilicity                    |                                                               |
| Log P <sub>ow</sub> (iLOGP)      | 3.49                                                          |
| Log P <sub>ow</sub> (XLOGP3)     | 4.07                                                          |
| Log P <sub>ow</sub> (WLOGP)      | 3.51                                                          |
| Log P <sub>ow</sub> (MLOGP)      | 3.31                                                          |
| Log P <sub>ow</sub> (SILICOS-IT) | 4.26                                                          |
| Consensus Log P <sub>ow</sub>    | 3.73                                                          |

| Water Solubility                     |                                      |
|--------------------------------------|--------------------------------------|
| Log S (ESOL)                         | -5.41                                |
| Solubility                           | 1.69e-03 mg/ml ; 3.87e-06 mol/l      |
| Class                                | Moderately soluble                   |
| Log S (Alii)                         | -5.36                                |
| Solubility                           | 1.92e-03 mg/ml ; 4.38e-06 mol/l      |
| Class                                | Moderately soluble                   |
| Log S (SILICOS-IT)                   | -7.69                                |
| Solubility                           | 8.93e-06 mg/ml ; 2.04e-08 mol/l      |
| Class                                | Poorly soluble                       |
| Pharmacokinetics                     |                                      |
| GI absorption                        | High                                 |
| BBB permeant                         | Yes                                  |
| P-gp substrate                       | Yes                                  |
| CYP1A2 inhibitor                     | No                                   |
| CYP2C19 inhibitor                    | Yes                                  |
| CYP2C9 inhibitor                     | Yes                                  |
| CYP2D6 inhibitor                     | No                                   |
| CYP3A4 inhibitor                     | Yes                                  |
| Log K <sub>p</sub> (skin permeation) | -6.08 cm/s                           |
| Druglikeness                         |                                      |
| Lipinski                             | Yes; 0 violation                     |
| Ghose                                | No; 1 violation: MR>130              |
| Veber                                | Yes                                  |
| Egan                                 | Yes                                  |
| Muegge                               | Yes                                  |
| Bioavailability Score                | 0.55                                 |
| Medicinal Chemistry                  |                                      |
| PAINS                                | 1 alert: mannich_A                   |
| Brenk                                | 0 alert                              |
| Leadlikeness                         | No; 2 violations: MW>350, XLOGP3>3.5 |
| Synthetic accessibility              | 3.90                                 |

5bea

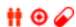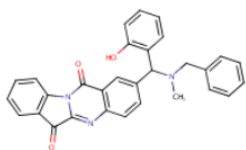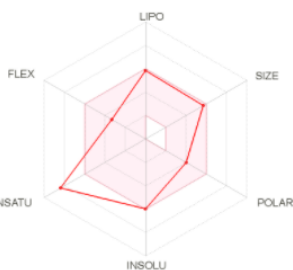

SMILES Oc1ccccc1C(c1ccc2c(c1)c(=O)n1c(n2)C(=O)c2c1ccc2)N(Cc1ccccc1)C

| Physicochemical Properties |              |
|----------------------------|--------------|
| Formula                    | C30H23N3O3   |
| Molecular weight           | 473.52 g/mol |
| Num. heavy atoms           | 36           |
| Num. arom. heavy atoms     | 28           |
| Fraction Csp3              | 0.10         |
| Num. rotatable bonds       | 5            |
| Num. H-bond acceptors      | 5            |
| Num. H-bond donors         | 1            |
| Molar Refractivity         | 139.25       |
| TPSA                       | 75.43 Å²     |
| Lipophilicity              |              |
| Log $P_{o/w}$ (ILOGP)      | 3.43         |
| Log $P_{o/w}$ (XLOGP3)     | 4.72         |
| Log $P_{o/w}$ (WLOGP)      | 4.38         |
| Log $P_{o/w}$ (MLOGP)      | 3.69         |
| Log $P_{o/w}$ (SILICOS-IT) | 4.85         |
| Consensus Log $P_{o/w}$    | 4.21         |

| Water Solubility            |                                      |
|-----------------------------|--------------------------------------|
| Log S (ESOL)                | -5.99                                |
| Solubility                  | 4.79e-04 mg/ml ; 1.01e-06 mol/l      |
| Class                       | Moderately soluble                   |
| Log S (Ali)                 | -6.03                                |
| Solubility                  | 4.39e-04 mg/ml ; 9.26e-07 mol/l      |
| Class                       | Poorly soluble                       |
| Log S (SILICOS-IT)          | -9.57                                |
| Solubility                  | 1.26e-07 mg/ml ; 2.67e-10 mol/l      |
| Class                       | Poorly soluble                       |
| Pharmacokinetics            |                                      |
| GI absorption               | High                                 |
| BBB permeant                | No                                   |
| P-gp substrate              | No                                   |
| CYP1A2 inhibitor            | No                                   |
| CYP2C19 inhibitor           | No                                   |
| CYP2C9 inhibitor            | Yes                                  |
| CYP2D6 inhibitor            | No                                   |
| CYP3A4 inhibitor            | No                                   |
| Log $K_p$ (skin permeation) | -5.84 cm/s                           |
| Druglikeness                |                                      |
| Lipinski                    | Yes; 0 violation                     |
| Ghose                       | No; 1 violation: MR>130              |
| Veber                       | Yes                                  |
| Egan                        | Yes                                  |
| Muegge                      | Yes                                  |
| Bioavailability Score       | 0.55                                 |
| Medicinal Chemistry         |                                      |
| PAINS                       | 1 alert: mannich_A                   |
| Brenk                       | 0 alert                              |
| Leadlikeness                | No; 2 violations: MW>350, XLOGP3>3.5 |
| Synthetic accessibility     | 4.05                                 |

5bac

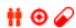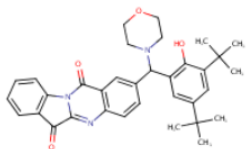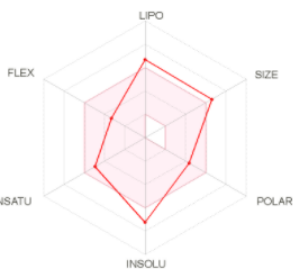

SMILES O=C1c2nc3ccc(cc3c(=O)n2c2c1ccc2)C(c1cc(cc1O)C(C)(C)C(C)(C)C)N1CCOCC1

| Physicochemical Properties |              |
|----------------------------|--------------|
| Formula                    | C34H37N3O4   |
| Molecular weight           | 551.68 g/mol |
| Num. heavy atoms           | 41           |
| Num. arom. heavy atoms     | 22           |
| Fraction Csp3              | 0.38         |
| Num. rotatable bonds       | 5            |
| Num. H-bond acceptors      | 6            |
| Num. H-bond donors         | 1            |
| Molar Refractivity         | 165.80       |
| TPSA                       | 84.66 Å²     |
| Lipophilicity              |              |
| Log $P_{o/w}$ (ILOGP)      | 4.72         |
| Log $P_{o/w}$ (XLOGP3)     | 6.20         |
| Log $P_{o/w}$ (WLOGP)      | 4.95         |
| Log $P_{o/w}$ (MLOGP)      | 3.84         |
| Log $P_{o/w}$ (SILICOS-IT) | 6.44         |
| Consensus Log $P_{o/w}$    | 5.23         |

| Water Solubility            |                                             |
|-----------------------------|---------------------------------------------|
| Log S (ESOL)                | -7.23                                       |
| Solubility                  | 3.22e-05 mg/ml ; 5.84e-08 mol/l             |
| Class                       | Poorly soluble                              |
| Log S (Ali)                 | -7.76                                       |
| Solubility                  | 9.53e-06 mg/ml ; 1.73e-08 mol/l             |
| Class                       | Poorly soluble                              |
| Log S (SILICOS-IT)          | -9.45                                       |
| Solubility                  | 1.98e-07 mg/ml ; 3.59e-10 mol/l             |
| Class                       | Poorly soluble                              |
| Pharmacokinetics            |                                             |
| GI absorption               | High                                        |
| BBB permeant                | No                                          |
| P-gp substrate              | Yes                                         |
| CYP1A2 inhibitor            | No                                          |
| CYP2C19 inhibitor           | No                                          |
| CYP2C9 inhibitor            | Yes                                         |
| CYP2D6 inhibitor            | Yes                                         |
| CYP3A4 inhibitor            | No                                          |
| Log $K_p$ (skin permeation) | -5.26 cm/s                                  |
| Druglikeness                |                                             |
| Lipinski                    | Yes; 1 violation: MW>500                    |
| Ghose                       | No; 3 violations: MW>480, MR>130, #atoms>70 |
| Veber                       | Yes                                         |
| Egan                        | Yes                                         |
| Muegge                      | No; 1 violation: XLOGP3>5                   |
| Bioavailability Score       | 0.55                                        |
| Medicinal Chemistry         |                                             |
| PAINS                       | 1 alert: mannich_A                          |
| Brenk                       | 0 alert                                     |
| Leadlikeness                | No; 2 violations: MW>350, XLOGP3>3.5        |
| Synthetic accessibility     | 4.84                                        |

**5bad**

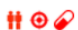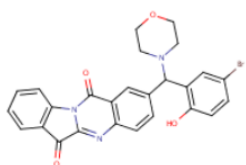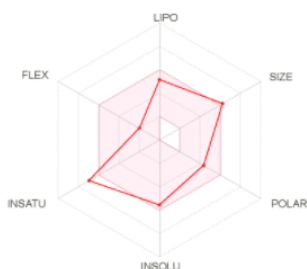

SMILES Brc1ccc(c(c1)C(c1ccc2c(c1)c(=O)n1c(n2)C(=O)c2c1cccc2)N1CCOCC1)O

| Physicochemical Properties       |                                                                 |
|----------------------------------|-----------------------------------------------------------------|
| Formula                          | C <sub>26</sub> H <sub>20</sub> BrN <sub>3</sub> O <sub>4</sub> |
| Molecular weight                 | 518.36 g/mol                                                    |
| Num. heavy atoms                 | 34                                                              |
| Num. arom. heavy atoms           | 22                                                              |
| Fraction Csp <sup>3</sup>        | 0.19                                                            |
| Num. rotatable bonds             | 3                                                               |
| Num. H-bond acceptors            | 6                                                               |
| Num. H-bond donors               | 1                                                               |
| Molar Refractivity               | 134.96                                                          |
| TPSA                             | 84.66 Å <sup>2</sup>                                            |
| Lipophilicity                    |                                                                 |
| Log P <sub>ow</sub> (ILOGP)      | 3.61                                                            |
| Log P <sub>ow</sub> (XLOGP3)     | 3.54                                                            |
| Log P <sub>ow</sub> (WLOGP)      | 3.11                                                            |
| Log P <sub>ow</sub> (MLOGP)      | 2.88                                                            |
| Log P <sub>ow</sub> (SILICOS-IT) | 4.29                                                            |
| Consensus Log P <sub>ow</sub>    | 3.49                                                            |

| Water Solubility                     |                                      |
|--------------------------------------|--------------------------------------|
| Log S (ESOL)                         | -5.56                                |
| Solubility                           | 1.41e-03 mg/ml ; 2.72e-06 mol/l      |
| Class                                | Moderately soluble                   |
| Log S (Ali)                          | -5.00                                |
| Solubility                           | 5.15e-03 mg/ml ; 9.94e-06 mol/l      |
| Class                                | Moderately soluble                   |
| Log S (SILICOS-IT)                   | -7.92                                |
| Solubility                           | 6.28e-06 mg/ml ; 1.21e-08 mol/l      |
| Class                                | Poorly soluble                       |
| Pharmacokinetics                     |                                      |
| GI absorption                        | High                                 |
| BBB permeant                         | No                                   |
| P-gp substrate                       | Yes                                  |
| CYP1A2 inhibitor                     | No                                   |
| CYP2C19 inhibitor                    | Yes                                  |
| CYP2C9 inhibitor                     | Yes                                  |
| CYP2D6 inhibitor                     | No                                   |
| CYP3A4 inhibitor                     | Yes                                  |
| Log K <sub>p</sub> (skin permeation) | -6.95 cm/s                           |
| Druglikeness                         |                                      |
| Lipinski                             | Yes; 1 violation: MW>500             |
| Ghose                                | No; 2 violations: MW>480, MR>130     |
| Veber                                | Yes                                  |
| Egan                                 | Yes                                  |
| Muegge                               | Yes                                  |
| Bioavailability Score                | 0.55                                 |
| Medicinal Chemistry                  |                                      |
| PAINS                                | 1 alert: mannich_A                   |
| Brenk                                | 0 alert                              |
| Leadlikeness                         | No; 2 violations: MW>350, XLOGP3>3.5 |
| Synthetic accessibility              | 3.92                                 |

**5baf**

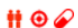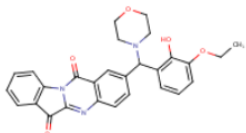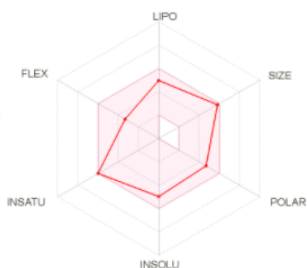

SMILES CCOC1CCCC(C1)C(C1CCC2C(C1)C(=O)N1C(N2)C(=O)C2C1CCCC2)N1C(CO)C1

| Physicochemical Properties       |                                                               |
|----------------------------------|---------------------------------------------------------------|
| Formula                          | C <sub>28</sub> H <sub>25</sub> N <sub>3</sub> O <sub>5</sub> |
| Molecular weight                 | 483.52 g/mol                                                  |
| Num. heavy atoms                 | 36                                                            |
| Num. arom. heavy atoms           | 22                                                            |
| Fraction Csp <sup>3</sup>        | 0.25                                                          |
| Num. rotatable bonds             | 5                                                             |
| Num. H-bond acceptors            | 7                                                             |
| Num. H-bond donors               | 1                                                             |
| Molar Refractivity               | 138.56                                                        |
| TPSA                             | 93.89 Å <sup>2</sup>                                          |
| Lipophilicity                    |                                                               |
| Log P <sub>ow</sub> (ILOGP)      | 3.73                                                          |
| Log P <sub>ow</sub> (XLOGP3)     | 3.19                                                          |
| Log P <sub>ow</sub> (WLOGP)      | 2.75                                                          |
| Log P <sub>ow</sub> (MLOGP)      | 2.19                                                          |
| Log P <sub>ow</sub> (SILICOS-IT) | 4.07                                                          |
| Consensus Log P <sub>ow</sub>    | 3.19                                                          |

| Water Solubility                     |                                  |
|--------------------------------------|----------------------------------|
| Log S (ESOL)                         | -4.97                            |
| Solubility                           | 5.18e-03 mg/ml ; 1.07e-05 mol/l  |
| Class                                | Moderately soluble               |
| Log S (Ali)                          | -4.83                            |
| Solubility                           | 7.10e-03 mg/ml ; 1.47e-05 mol/l  |
| Class                                | Moderately soluble               |
| Log S (SILICOS-IT)                   | -7.64                            |
| Solubility                           | 1.12e-05 mg/ml ; 2.31e-08 mol/l  |
| Class                                | Poorly soluble                   |
| Pharmacokinetics                     |                                  |
| GI absorption                        | High                             |
| BBB permeant                         | No                               |
| P-gp substrate                       | Yes                              |
| CYP1A2 inhibitor                     | No                               |
| CYP2C19 inhibitor                    | No                               |
| CYP2C9 inhibitor                     | Yes                              |
| CYP2D6 inhibitor                     | Yes                              |
| CYP3A4 inhibitor                     | Yes                              |
| Log K <sub>p</sub> (skin permeation) | -6.98 cm/s                       |
| Druglikeness                         |                                  |
| Lipinski                             | Yes; 0 violation                 |
| Ghose                                | No; 2 violations: MW>480, MR>130 |
| Veber                                | Yes                              |
| Egan                                 | Yes                              |
| Muegge                               | Yes                              |
| Bioavailability Score                | 0.55                             |
| Medicinal Chemistry                  |                                  |
| PAINS                                | 1 alert: mannich_A               |
| Brenk                                | 0 alert                          |
| Leadlikeness                         | No; 1 violation: MW>350          |
| Synthetic accessibility              | 4.17                             |

5bag

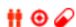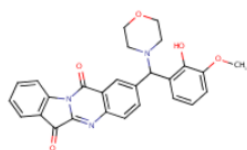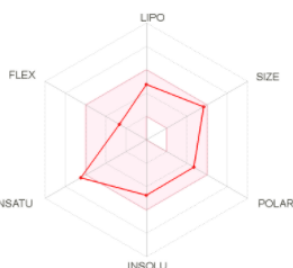

SMILES COc1cccc(c1O)C(c1ccc2c(c1)c(=O)n1c(n2)C(=O)c2c1cccc2)N1CCOCC1

| Physicochemical Properties |                      |
|----------------------------|----------------------|
| Formula                    | C27H23N3O5           |
| Molecular weight           | 469.49 g/mol         |
| Num. heavy atoms           | 35                   |
| Num. arom. heavy atoms     | 22                   |
| Fraction Csp3              | 0.22                 |
| Num. rotatable bonds       | 4                    |
| Num. H-bond acceptors      | 7                    |
| Num. H-bond donors         | 1                    |
| Molar Refractivity         | 133.75               |
| TPSA                       | 93.89 Å <sup>2</sup> |
| Lipophilicity              |                      |
| Log $P_{ow}$ (iLOGP)       | 3.39                 |
| Log $P_{ow}$ (XLOGP3)      | 2.82                 |
| Log $P_{ow}$ (WLOGP)       | 2.36                 |
| Log $P_{ow}$ (MLOGP)       | 1.99                 |
| Log $P_{ow}$ (SILICOS-IT)  | 3.67                 |
| Consensus Log $P_{ow}$     | 2.85                 |

| Water Solubility            |                                 |
|-----------------------------|---------------------------------|
| Log S (ESOL)                | -4.73                           |
| Solubility                  | 8.77e-03 mg/ml ; 1.87e-05 mol/l |
| Class                       | Moderately soluble              |
| Log S (Ali)                 | -4.45                           |
| Solubility                  | 1.67e-02 mg/ml ; 3.55e-05 mol/l |
| Class                       | Moderately soluble              |
| Log S (SILICOS-IT)          | -7.25                           |
| Solubility                  | 2.66e-05 mg/ml ; 5.66e-08 mol/l |
| Class                       | Poorly soluble                  |
| Pharmacokinetics            |                                 |
| GI absorption               | High                            |
| BBB permeant                | No                              |
| P-gp substrate              | Yes                             |
| CYP1A2 inhibitor            | No                              |
| CYP2C19 inhibitor           | No                              |
| CYP2C9 inhibitor            | Yes                             |
| CYP2D6 inhibitor            | Yes                             |
| CYP3A4 inhibitor            | Yes                             |
| Log $K_p$ (skin permeation) | -7.16 cm/s                      |
| Druglikeness                |                                 |
| Lipinski                    | Yes; 0 violation                |
| Ghose                       | No; 1 violation: MR>130         |
| Veber                       | Yes                             |
| Egan                        | Yes                             |
| Muegge                      | Yes                             |
| Bioavailability Score       | 0.55                            |
| Medicinal Chemistry         |                                 |
| PAINS                       | 1 alert: mannich_A              |
| Brenk                       | 0 alert                         |
| Leadlikeness                | No; 1 violation: MW>350         |
| Synthetic accessibility     | 4.05                            |

5caa

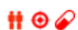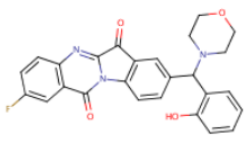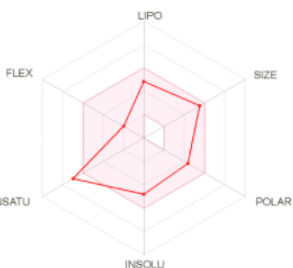

SMILES Fc1ccc2c(c1)c(=O)n1c(n2)C(=O)c2c1ccc(c2)C1c1cccc1O)N1CCOCC1

| Physicochemical Properties |                      |
|----------------------------|----------------------|
| Formula                    | C26H20FN3O4          |
| Molecular weight           | 457.45 g/mol         |
| Num. heavy atoms           | 34                   |
| Num. arom. heavy atoms     | 22                   |
| Fraction Csp3              | 0.19                 |
| Num. rotatable bonds       | 3                    |
| Num. H-bond acceptors      | 7                    |
| Num. H-bond donors         | 1                    |
| Molar Refractivity         | 127.22               |
| TPSA                       | 84.66 Å <sup>2</sup> |
| Lipophilicity              |                      |
| Log $P_{ow}$ (iLOGP)       | 3.29                 |
| Log $P_{ow}$ (XLOGP3)      | 2.95                 |
| Log $P_{ow}$ (WLOGP)       | 2.91                 |
| Log $P_{ow}$ (MLOGP)       | 2.27                 |
| Log $P_{ow}$ (SILICOS-IT)  | 4.03                 |
| Consensus Log $P_{ow}$     | 3.09                 |

| Water Solubility            |                                 |
|-----------------------------|---------------------------------|
| Log S (ESOL)                | -4.82                           |
| Solubility                  | 7.00e-03 mg/ml ; 1.53e-05 mol/l |
| Class                       | Moderately soluble              |
| Log S (Ali)                 | -4.39                           |
| Solubility                  | 1.86e-02 mg/ml ; 4.07e-05 mol/l |
| Class                       | Moderately soluble              |
| Log S (SILICOS-IT)          | -7.41                           |
| Solubility                  | 1.78e-05 mg/ml ; 3.88e-08 mol/l |
| Class                       | Poorly soluble                  |
| Pharmacokinetics            |                                 |
| GI absorption               | High                            |
| BBB permeant                | No                              |
| P-gp substrate              | Yes                             |
| CYP1A2 inhibitor            | No                              |
| CYP2C19 inhibitor           | No                              |
| CYP2C9 inhibitor            | Yes                             |
| CYP2D6 inhibitor            | No                              |
| CYP3A4 inhibitor            | Yes                             |
| Log $K_p$ (skin permeation) | -7.00 cm/s                      |
| Druglikeness                |                                 |
| Lipinski                    | Yes; 0 violation                |
| Ghose                       | Yes                             |
| Veber                       | Yes                             |
| Egan                        | Yes                             |
| Muegge                      | Yes                             |
| Bioavailability Score       | 0.55                            |
| Medicinal Chemistry         |                                 |
| PAINS                       | 1 alert: mannich_A              |
| Brenk                       | 0 alert                         |
| Leadlikeness                | No; 1 violation: MW>350         |
| Synthetic accessibility     | 3.92                            |

5cai

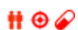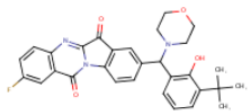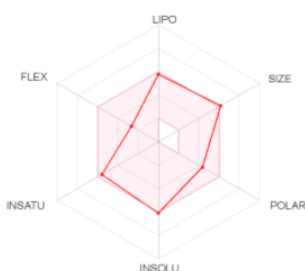

SMILES Fc1ccc2c(c1)c(=O)n1c(n2)C(=O)c2c1ccc(c2)C(c1cccc(c1O)C(C)(C)N1CCOCC1

| Physicochemical Properties |              |
|----------------------------|--------------|
| Formula                    | C30H28FN3O4  |
| Molecular weight           | 513.56 g/mol |
| Num. heavy atoms           | 38           |
| Num. arom. heavy atoms     | 22           |
| Fraction Csp3              | 0.30         |
| Num. rotatable bonds       | 4            |
| Num. H-bond acceptors      | 7            |
| Num. H-bond donors         | 1            |
| Molar Refractivity         | 146.49       |
| TPSA                       | 84.66 Å²     |
| Lipophilicity              |              |
| Log $P_{o/w}$ (ILOGP)      | 4.03         |
| Log $P_{o/w}$ (XLOGP3)     | 4.63         |
| Log $P_{o/w}$ (WLOGP)      | 4.21         |
| Log $P_{o/w}$ (MLOGP)      | 3.05         |
| Log $P_{o/w}$ (SILICOS-IT) | 5.43         |
| Consensus Log $P_{o/w}$    | 4.27         |

| Water Solubility            |                                      |
|-----------------------------|--------------------------------------|
| Log S (ESOL)                | -6.11                                |
| Solubility                  | 4.03e-04 mg/ml ; 7.85e-07 mol/l      |
| Class                       | Poorly soluble                       |
| Log S (Ali)                 | -6.13                                |
| Solubility                  | 3.78e-04 mg/ml ; 7.35e-07 mol/l      |
| Class                       | Poorly soluble                       |
| Log S (SILICOS-IT)          | -8.56                                |
| Solubility                  | 1.41e-06 mg/ml ; 2.75e-09 mol/l      |
| Class                       | Poorly soluble                       |
| Pharmacokinetics            |                                      |
| GI absorption               | High                                 |
| BBB permeant                | No                                   |
| P-gp substrate              | Yes                                  |
| CYP1A2 inhibitor            | No                                   |
| CYP2C19 inhibitor           | Yes                                  |
| CYP2C9 inhibitor            | Yes                                  |
| CYP2D6 inhibitor            | Yes                                  |
| CYP3A4 inhibitor            | Yes                                  |
| Log $K_p$ (skin permeation) | -6.15 cm/s                           |
| Druglikeness                |                                      |
| Lipinski                    | Yes; 1 violation: MW>500             |
| Ghose                       | No; 2 violations: MW>480, MR>130     |
| Veber                       | Yes                                  |
| Egan                        | Yes                                  |
| Muegge                      | Yes                                  |
| Bioavailability Score       | 0.55                                 |
| Medicinal Chemistry         |                                      |
| PAINS                       | 1 alert: mannich_A                   |
| Brenk                       | 0 alert                              |
| Leadlikeness                | No; 2 violations: MW>350, XLOGP3>3.5 |
| Synthetic accessibility     | 4.39                                 |

5daa

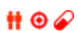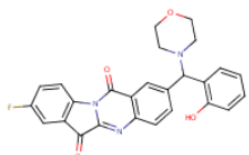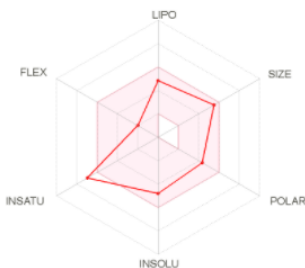

SMILES Fc1ccc2c(c1)C(=O)c1n2c(=O)c2c(n1)ccc(c2)C(c1cccc1O)N1CCOCC1

| Physicochemical Properties |              |
|----------------------------|--------------|
| Formula                    | C26H20FN3O4  |
| Molecular weight           | 457.45 g/mol |
| Num. heavy atoms           | 34           |
| Num. arom. heavy atoms     | 22           |
| Fraction Csp3              | 0.19         |
| Num. rotatable bonds       | 3            |
| Num. H-bond acceptors      | 7            |
| Num. H-bond donors         | 1            |
| Molar Refractivity         | 127.22       |
| TPSA                       | 84.66 Å²     |
| Lipophilicity              |              |
| Log $P_{o/w}$ (ILOGP)      | 3.31         |
| Log $P_{o/w}$ (XLOGP3)     | 2.95         |
| Log $P_{o/w}$ (WLOGP)      | 2.91         |
| Log $P_{o/w}$ (MLOGP)      | 2.68         |
| Log $P_{o/w}$ (SILICOS-IT) | 4.03         |
| Consensus Log $P_{o/w}$    | 3.17         |

| Water Solubility            |                                 |
|-----------------------------|---------------------------------|
| Log S (ESOL)                | -4.82                           |
| Solubility                  | 7.00e-03 mg/ml ; 1.53e-05 mol/l |
| Class                       | Moderately soluble              |
| Log S (Ali)                 | -4.39                           |
| Solubility                  | 1.86e-02 mg/ml ; 4.07e-05 mol/l |
| Class                       | Moderately soluble              |
| Log S (SILICOS-IT)          | -7.41                           |
| Solubility                  | 1.78e-05 mg/ml ; 3.88e-08 mol/l |
| Class                       | Poorly soluble                  |
| Pharmacokinetics            |                                 |
| GI absorption               | High                            |
| BBB permeant                | No                              |
| P-gp substrate              | Yes                             |
| CYP1A2 inhibitor            | No                              |
| CYP2C19 inhibitor           | No                              |
| CYP2C9 inhibitor            | Yes                             |
| CYP2D6 inhibitor            | No                              |
| CYP3A4 inhibitor            | Yes                             |
| Log $K_p$ (skin permeation) | -7.00 cm/s                      |
| Druglikeness                |                                 |
| Lipinski                    | Yes; 0 violation                |
| Ghose                       | Yes                             |
| Veber                       | Yes                             |
| Egan                        | Yes                             |
| Muegge                      | Yes                             |
| Bioavailability Score       | 0.55                            |
| Medicinal Chemistry         |                                 |
| PAINS                       | 1 alert: mannich_A              |
| Brenk                       | 0 alert                         |
| Leadlikeness                | No; 1 violation: MW>350         |
| Synthetic accessibility     | 3.89                            |



5dca

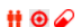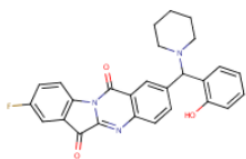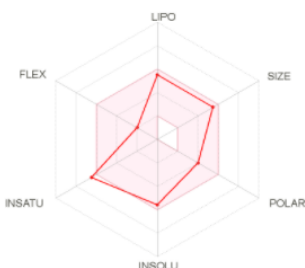

SMILES Fc1ccc2c(c1)C(=O)c1n2c(=O)c2c(n1)ccc(c2)C(c1cccc1O)N1CCC  
CC1

Physicochemical Properties

|                        |              |
|------------------------|--------------|
| Formula                | C27H22FN3O3  |
| Molecular weight       | 455.48 g/mol |
| Num. heavy atoms       | 34           |
| Num. arom. heavy atoms | 22           |
| Fraction Csp3          | 0.22         |
| Num. rotatable bonds   | 3            |
| Num. H-bond acceptors  | 6            |
| Num. H-bond donors     | 1            |
| Molar Refractivity     | 130.94       |
| TPSA                   | 75.43 Å²     |

Lipophilicity

|                           |      |
|---------------------------|------|
| Log $P_{ow}$ (ILOGP)      | 3.60 |
| Log $P_{ow}$ (XLOGP3)     | 4.17 |
| Log $P_{ow}$ (WLOGP)      | 4.07 |
| Log $P_{ow}$ (MLOGP)      | 3.68 |
| Log $P_{ow}$ (SILICOS-IT) | 4.67 |
| Consensus Log $P_{ow}$    | 4.04 |

Water Solubility

|                    |                                 |
|--------------------|---------------------------------|
| Log S (ESOL)       | -5.57                           |
| Solubility         | 1.22e-03 mg/ml ; 2.68e-06 mol/l |
| Class              | Moderately soluble              |
| Log S (Ali)        | -5.46                           |
| Solubility         | 1.57e-03 mg/ml ; 3.45e-06 mol/l |
| Class              | Moderately soluble              |
| Log S (SILICOS-IT) | -7.95                           |
| Solubility         | 5.09e-06 mg/ml ; 1.12e-08 mol/l |
| Class              | Poorly soluble                  |

Pharmacokinetics

|                             |            |
|-----------------------------|------------|
| GI absorption               | High       |
| BBB permeant                | Yes        |
| P-gp substrate              | Yes        |
| CYP1A2 inhibitor            | No         |
| CYP2C19 inhibitor           | Yes        |
| CYP2C9 inhibitor            | Yes        |
| CYP2D6 inhibitor            | No         |
| CYP3A4 inhibitor            | No         |
| Log $K_p$ (skin permeation) | -6.12 cm/s |

Druglikeness

|                       |                         |
|-----------------------|-------------------------|
| Lipinski              | Yes; 0 violation        |
| Ghose                 | No; 1 violation: MR>130 |
| Veber                 | Yes                     |
| Egan                  | Yes                     |
| Muegge                | Yes                     |
| Bioavailability Score | 0.55                    |

Medicinal Chemistry

|                         |                                      |
|-------------------------|--------------------------------------|
| PAINS                   | 1 alert: mannich_A                   |
| Brenk                   | 0 alert                              |
| Leadlikeness            | No; 2 violations: MW>350, XLOGP3>3.5 |
| Synthetic accessibility | 3.93                                 |

5dad

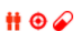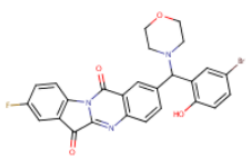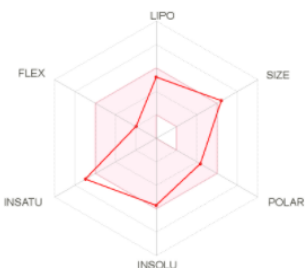

SMILES Fc1ccc2c(c1)C(=O)c1n2c(=O)c2c(n1)ccc(c2)C(c1cc(Br)ccc1O)N1C  
COCC1

Physicochemical Properties

|                        |               |
|------------------------|---------------|
| Formula                | C26H19BrFN3O4 |
| Molecular weight       | 536.35 g/mol  |
| Num. heavy atoms       | 35            |
| Num. arom. heavy atoms | 22            |
| Fraction Csp3          | 0.19          |
| Num. rotatable bonds   | 3             |
| Num. H-bond acceptors  | 7             |
| Num. H-bond donors     | 1             |
| Molar Refractivity     | 134.92        |
| TPSA                   | 84.66 Å²      |

Lipophilicity

|                           |      |
|---------------------------|------|
| Log $P_{ow}$ (ILOGP)      | 3.70 |
| Log $P_{ow}$ (XLOGP3)     | 3.65 |
| Log $P_{ow}$ (WLOGP)      | 3.67 |
| Log $P_{ow}$ (MLOGP)      | 3.24 |
| Log $P_{ow}$ (SILICOS-IT) | 4.70 |
| Consensus Log $P_{ow}$    | 3.79 |

Water Solubility

|                    |                                 |
|--------------------|---------------------------------|
| Log S (ESOL)       | -5.73                           |
| Solubility         | 9.94e-04 mg/ml ; 1.85e-06 mol/l |
| Class              | Moderately soluble              |
| Log S (Ali)        | -5.12                           |
| Solubility         | 4.10e-03 mg/ml ; 7.64e-06 mol/l |
| Class              | Moderately soluble              |
| Log S (SILICOS-IT) | -8.18                           |
| Solubility         | 3.58e-06 mg/ml ; 6.68e-09 mol/l |
| Class              | Poorly soluble                  |

Pharmacokinetics

|                             |            |
|-----------------------------|------------|
| GI absorption               | High       |
| BBB permeant                | No         |
| P-gp substrate              | Yes        |
| CYP1A2 inhibitor            | No         |
| CYP2C19 inhibitor           | Yes        |
| CYP2C9 inhibitor            | Yes        |
| CYP2D6 inhibitor            | No         |
| CYP3A4 inhibitor            | Yes        |
| Log $K_p$ (skin permeation) | -6.98 cm/s |

Druglikeness

|                       |                                  |
|-----------------------|----------------------------------|
| Lipinski              | Yes; 1 violation: MW>500         |
| Ghose                 | No; 2 violations: MW>480, MR>130 |
| Veber                 | Yes                              |
| Egan                  | Yes                              |
| Muegge                | Yes                              |
| Bioavailability Score | 0.55                             |

Medicinal Chemistry

|                         |                                      |
|-------------------------|--------------------------------------|
| PAINS                   | 1 alert: mannich_A                   |
| Brenk                   | 0 alert                              |
| Leadlikeness            | No; 2 violations: MW>350, XLOGP3>3.5 |
| Synthetic accessibility | 3.95                                 |
